# Supplementary material for: Distal regulation, silencers, and a shared combinatorial syntax are hallmarks of animal embryogenesis
Source: PubMed Central journal article supplement — Genome Res. 2022 Mar;32(3):474–87. doi: 10.1101/gr.275864.121 (PMC8896464; doi:10.1101/gr.275864.121), 2022-03
Supplement: supp_gr.275864.121_Supplemental_Material_.pdf [file supp_gr.275864.121_Supplemental_Material_.pdf]

## **Supplementary material**

### **Distal regulation, silencers and a shared combinatorial syntax are hallmarks of animal embryogenesis**

Paola Cornejo-Páramo<sup>1,2</sup>, Kathrein Roper<sup>3</sup>, Sandie M Degnan<sup>3</sup>, Bernard M Degnan<sup>3</sup>, Emily S Wong<sup>1,3,4\*</sup>

\*correspondence to  
[e.wong@victorchang.edu.au](mailto:e.wong@victorchang.edu.au)

## Table of Contents

|                                                                                                                                                                                                                                                       |    |
|-------------------------------------------------------------------------------------------------------------------------------------------------------------------------------------------------------------------------------------------------------|----|
| Supplemental Fig. S1. Pearson’s correlation of ATAC-seq data across <i>Amphimedon</i> developmental stages .....                                                                                                                                      | 3  |
| Supplemental Fig. S2. Irreproducible Discovery Rate (IDR) of <i>Amphimedon</i> ATAC-seq libraries .....                                                                                                                                               | 4  |
| Supplemental Fig. S3. Density of insert fragment size in <i>Amphimedon</i> ATAC-seq libraries .....                                                                                                                                                   | 5  |
| Supplemental Fig. S4. Distribution of <i>Amphimedon</i> ATAC-seq peaks in multiple genomic features by developmental stage.....                                                                                                                       | 6  |
| Supplemental Fig. S5. Distribution of <i>Amphimedon</i> , worm, fruit fly, human and <i>Capsaspora</i> <i>cis</i> -regulatory regions into multiple genomic features .....                                                                            | 7  |
| Supplemental Fig. S6. Little change to chromatin accessibility around the TSS with and without more variable samples.....                                                                                                                             | 8  |
| Supplemental Fig. S7. KEGG functional categories of genes proximal to ATAC-seq peaks.....                                                                                                                                                             | 9  |
| Supplemental Fig. S8. <i>Amphimedon de novo</i> <i>k</i> -mers .....                                                                                                                                                                                  | 10 |
| Supplemental Fig. S9. Extreme gradient boosting machine (XGB) pipeline for the prediction of distal <i>cis</i> -regulatory regions against proximal <i>cis</i> -regulatory regions using known and <i>de novo</i> PMWs in <i>Amphimedon</i> data..... | 12 |
| Supplemental Fig. S10. TF families and classes of the most predictive motifs of <i>Amphimedon</i> distal ATAC-seq peaks compared to the JASPAR reference set .....                                                                                    | 14 |
| Supplemental Fig. S11. Width of <i>cis</i> -regulatory regions across species .....                                                                                                                                                                   | 15 |
| Supplemental Fig. S12. Receiver Operating Characteristic (ROC) curves and SHAP values of XGB models trained to distinguish distal <i>cis</i> -regulatory regions from background .....                                                                | 16 |
| Supplemental Fig. S13. Receiver Operating Characteristic (ROC) curves and SHAP values of XGB models trained to distinguish proximal <i>cis</i> -regulatory regions from background .....                                                              | 17 |
| Supplemental Fig. S14. Frequencies of motifs per peak for the top four most predictive motifs in <i>Amphimedon</i> distal regions .....                                                                                                               | 18 |
| Supplemental Fig. S15. ROC curves of the prediction of distal <i>cis</i> -regulatory regions on PWMs counts normalised by peak width.....                                                                                                             | 19 |
| Supplemental Fig. S16. dAUC values of most predictive motifs of <i>Amphimedon</i> distal <i>cis</i> -regulatory regions .....                                                                                                                         | 20 |
| Legends for Supplementary Tables.....                                                                                                                                                                                                                 | 21 |

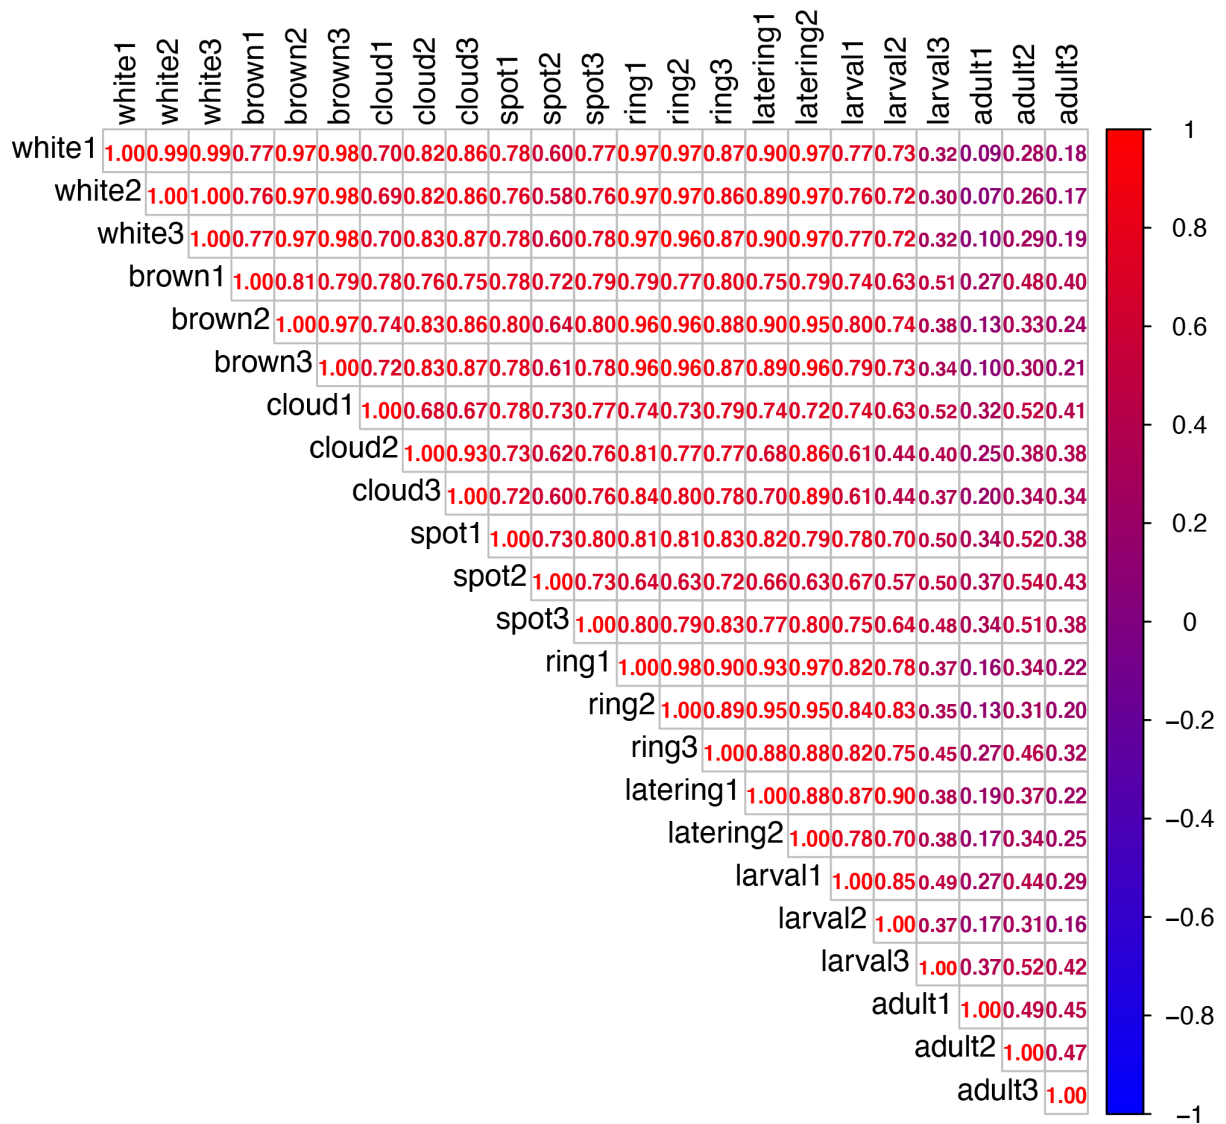

**Supplemental Fig. S1. Pearson's correlation of ATAC-seq data across *Amphimedon* developmental stages** Pearson's correlation of normalised ATAC-seq counts is shown for all *Amphimedon* ATAC-seq libraries (n = 23 libraries) across developmental stages (n = 3, n = 2, n = 3, and n = 3 libraries for white, brown, cloud, spot, ring, late ring, larval and adult stages respectively).

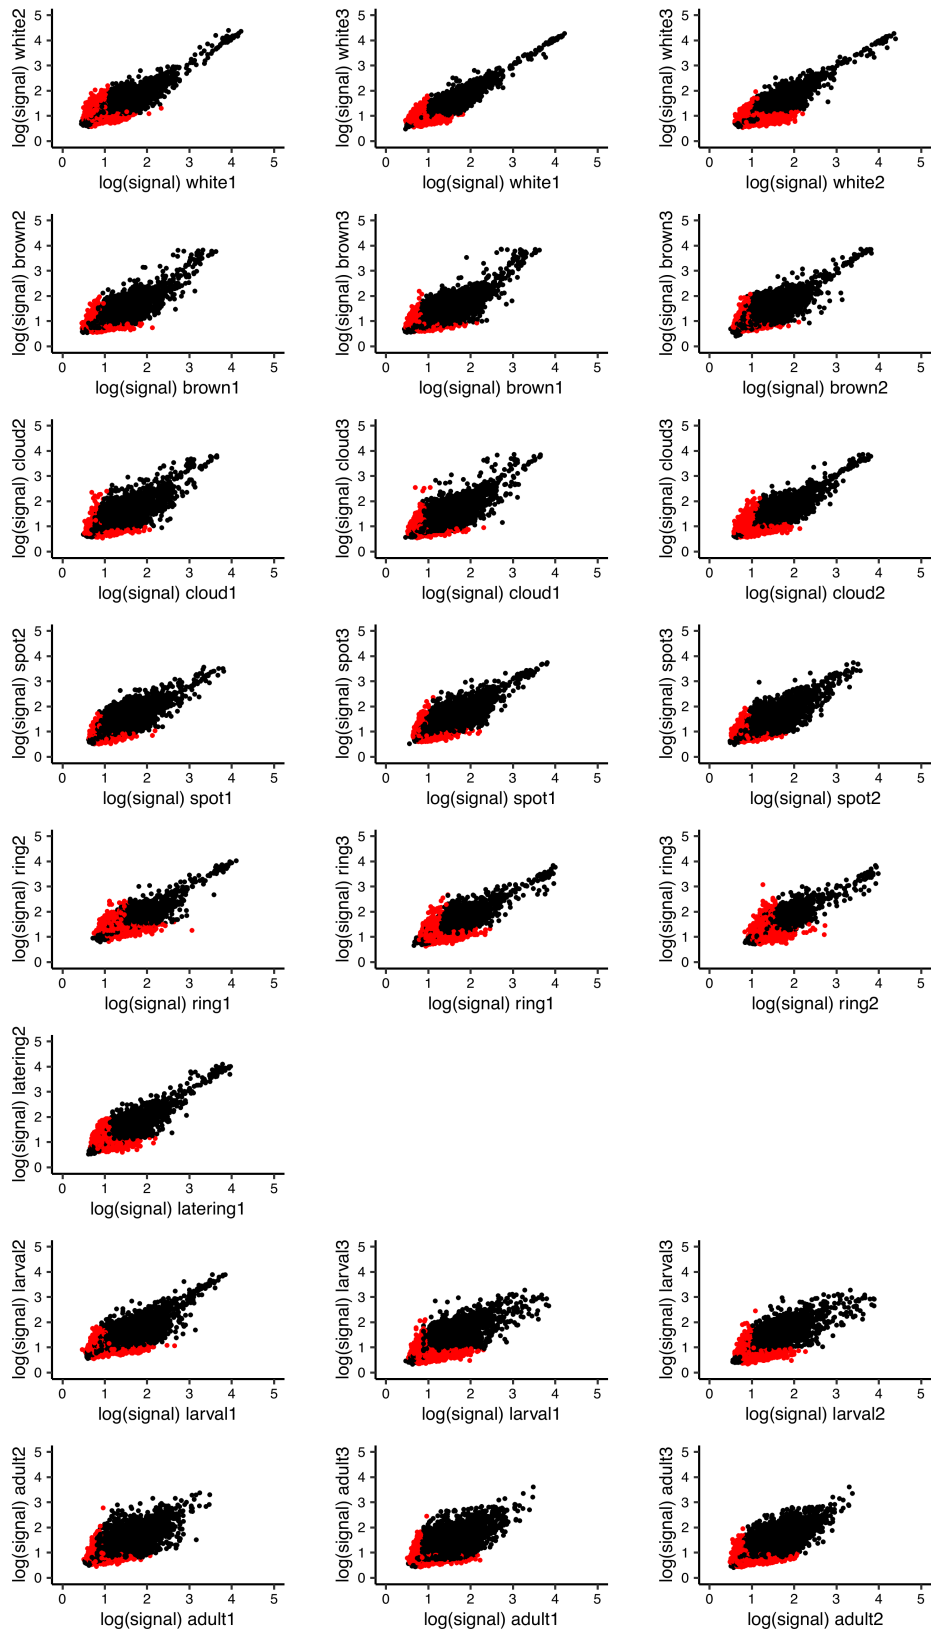

**Supplemental Fig. S2. Irreproducible Discovery Rate (IDR) of *Amphimedon* ATAC-seq libraries** Pairwise IDR of *Amphimedon* ATAC-seq libraries of every developmental stage is shown. Overlapping peaks with IDR  $\leq 10\%$  are illustrated in black.

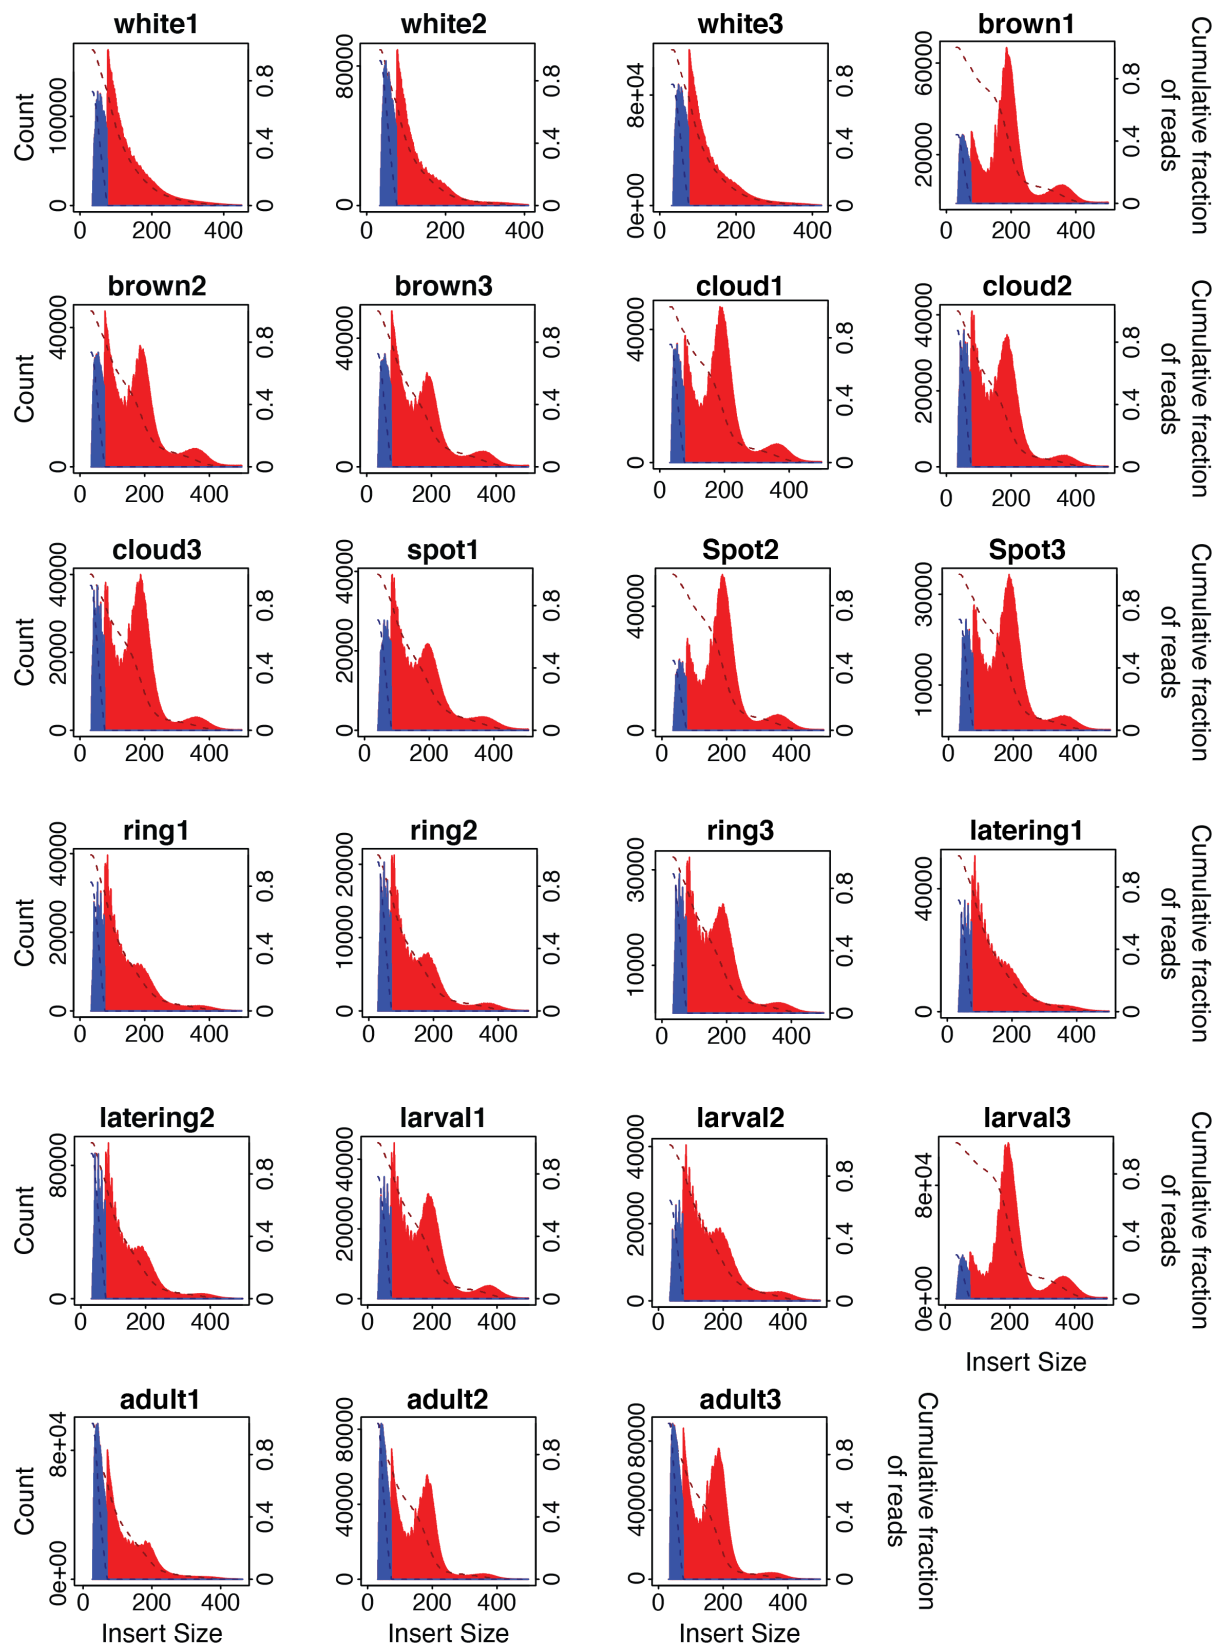

**Supplemental Fig. S3. Density of insert fragment size in *Amphimedon* ATAC-seq libraries**  
 Forward to reverse (FR) fragments are shown in red and reverse to forward (RF) fragments are shown in blue.

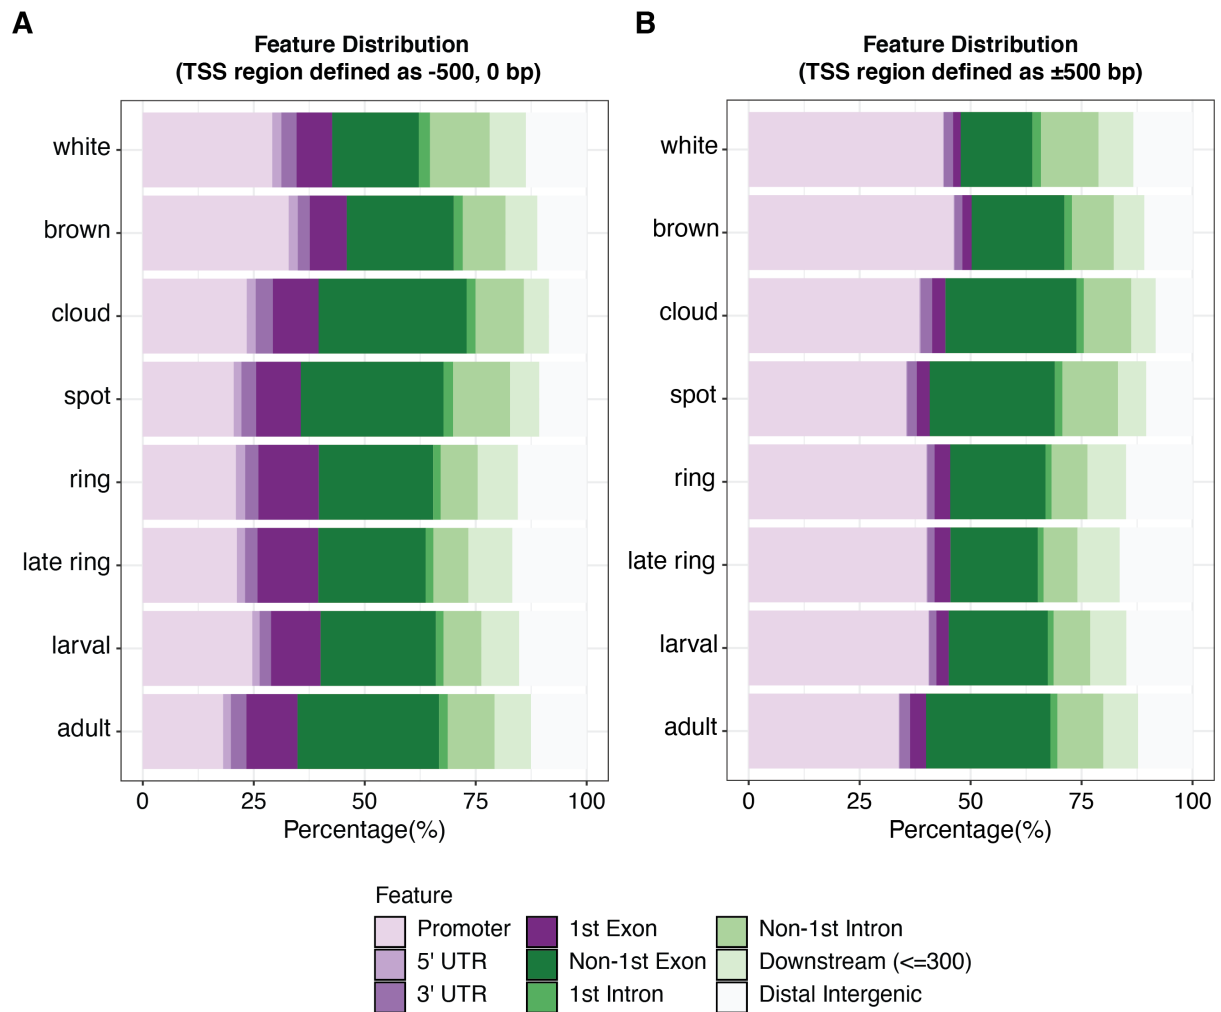

**Supplemental Fig. S4. Distribution of *Amphimedon* ATAC-seq peaks in multiple genomic features by developmental stage** *Amphimedon* developmental stages are indicated in chronological order (top to bottom), the colour code represents different genomic features. The TSS region was defined as -500 to 0 bp (A) and as  $\pm 500$  bp (B).

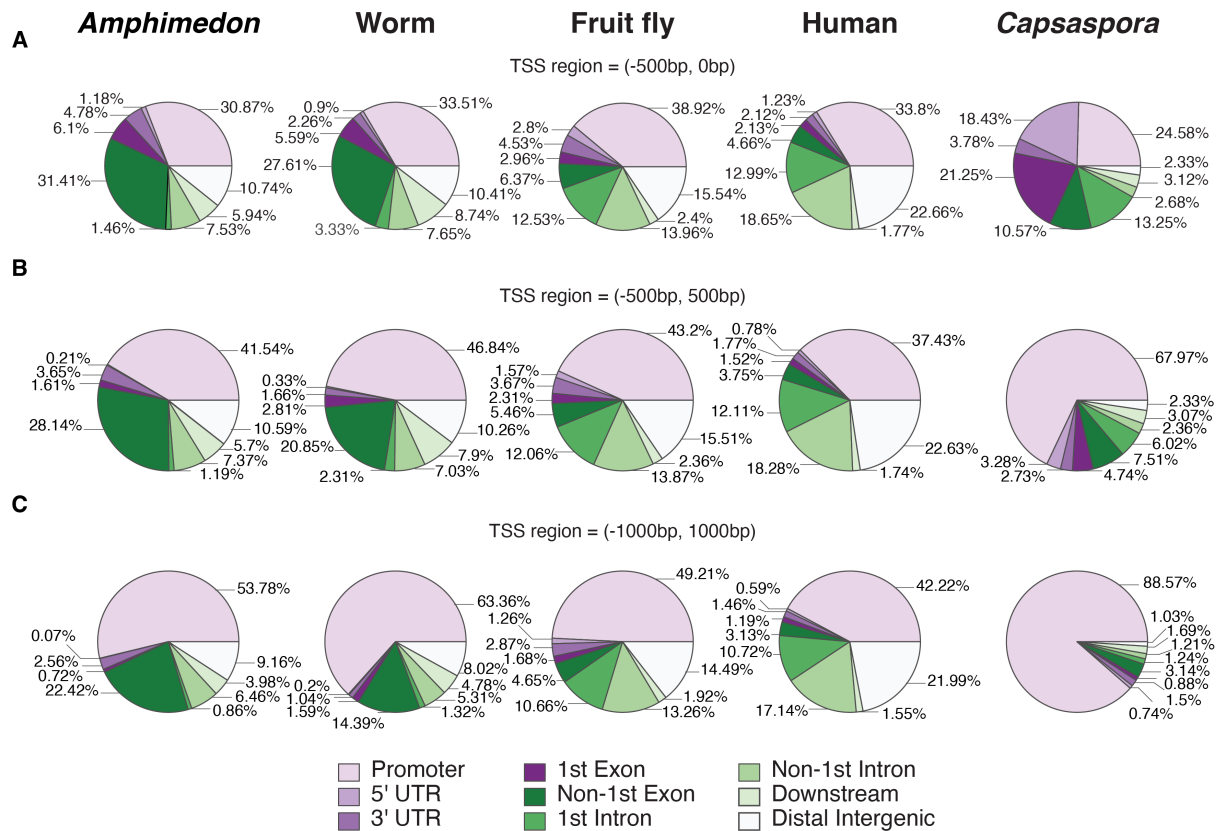

**Supplemental Fig. S5. Distribution of *Amphimedon*, worm, fruit fly, human and *Capsaspora* cis-regulatory regions into multiple genomic features** Transcription start site (TSS) region was defined from -500 to 0 bp from the TSS (A), from -500 to 500 bp (B) and from -1000 to 1000 bp (C).

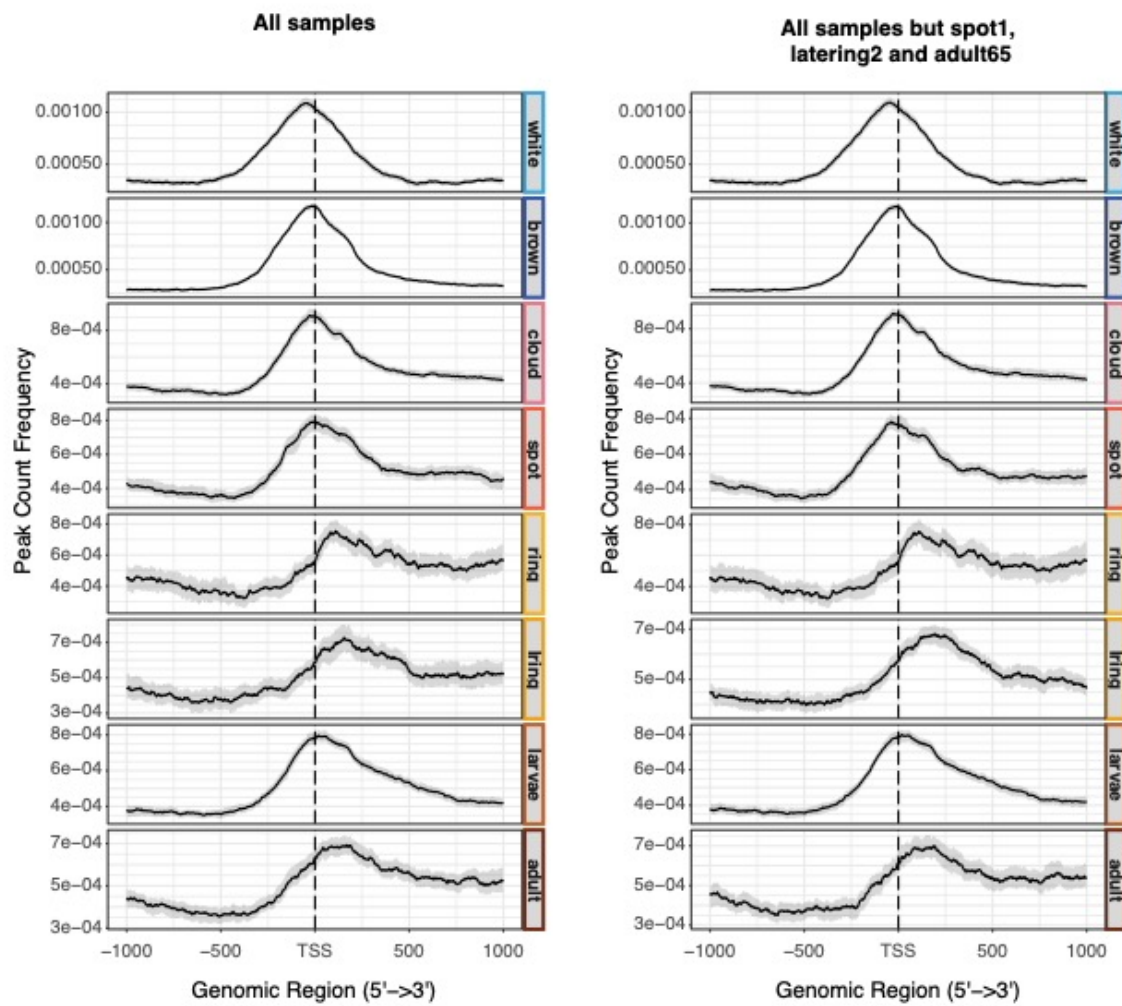

**Supplemental Fig. S6. Little change to chromatin accessibility around the TSS with and without more variable samples** Peaks were used only if at least 50% of bases overlapped across biological replicates.



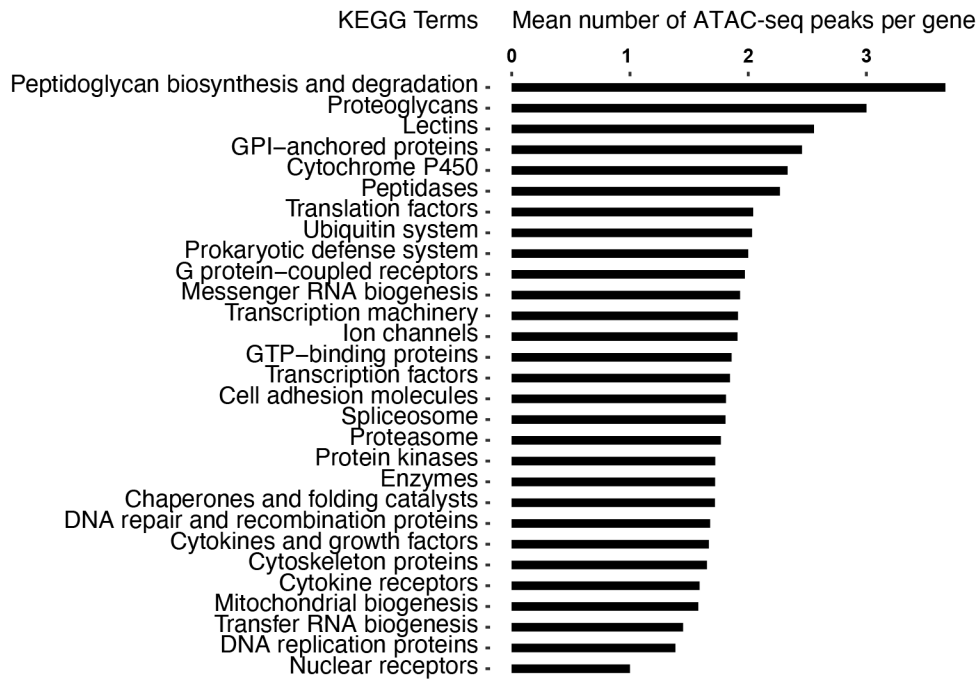

**Supplemental Fig. S7. KEGG functional categories of genes proximal to ATAC-seq peaks**  
Mean number of ATAC-seq peaks proximal to *Amphimedon* genes grouped by KEGG functional categories. Proximity defined as  $\pm 500$  bp from TSS.

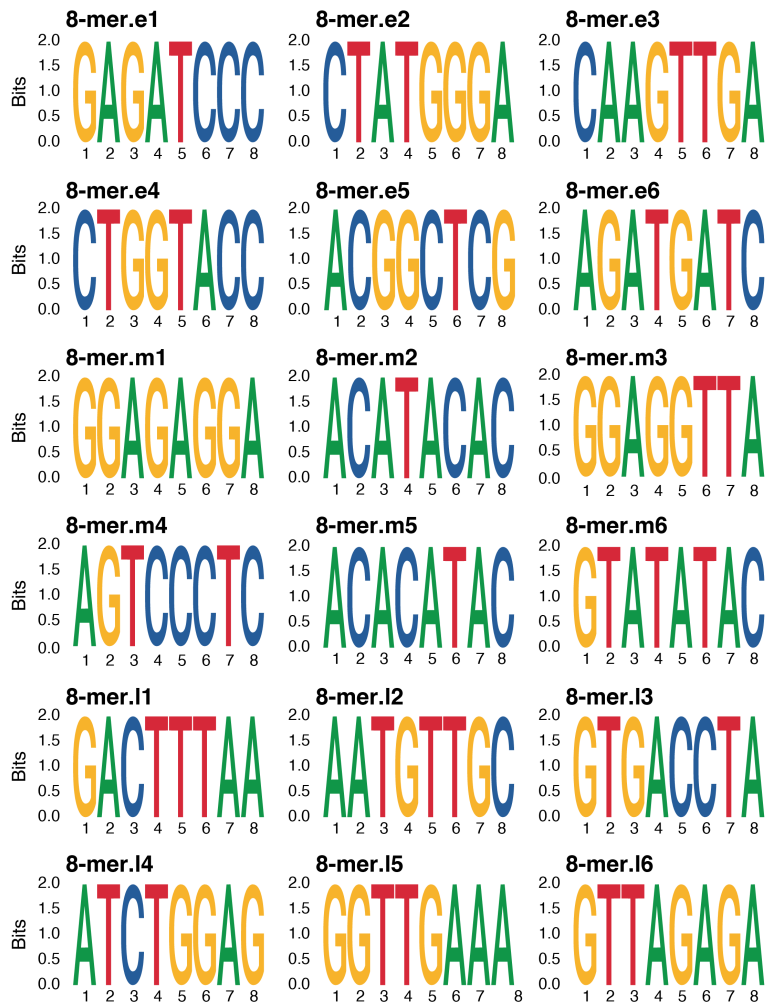

**Supplemental Fig. S8. *Amphimedon de novo k-mers*** *De novo* 8-mers that demarcate each broad developmental stage in *Amphimedon*, denoted as early: 8-mer.e, mid: 8-mer.m, late: 8-mer.l. List of 8-mers and their significance levels are shown in Table S6. Similarity of 8-mers and JASPAR motifs is shown in Table S7.

### A Motif enrichment (HOMER) and motif count

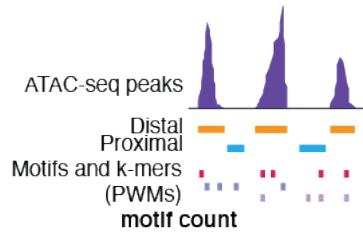

### B

#### Get balanced subset

|                 | PWM1 | PWM2 |   | PWM1            | PWM2 | ... | is.distal | Distal |
|-----------------|------|------|---|-----------------|------|-----|-----------|--------|
| Distal peak 1   | 0    | 1    | → | Distal peak 1   | 0    | 1   | ...       | 1      |
| Distal peak 2   | 8    | 0    |   | Distal peak 2   | 8    | 0   | ...       | 1      |
| ...             |      |      |   | ...             |      |     |           |        |
| Proximal peak 1 | 0    | 1    |   | Proximal peak 1 | 0    | 1   | ...       | 0      |
| Proximal peak 2 | 2    | 0    |   | Proximal peak 2 | 2    | 1   | ...       | 0      |
| ...             |      |      |   | ...             |      |     |           |        |

Distal ATAC-seq peak = 1  
Proximal ATAC-seq peak = 0

### C Split data into training and test datasets

| Training dataset (70% peaks) |      |      |     | Test dataset (30% peaks) |                 |      |      |     |           |
|------------------------------|------|------|-----|--------------------------|-----------------|------|------|-----|-----------|
|                              | PWM1 | PWM2 | ... | is.distal                |                 | PWM1 | PWM2 | ... | is.distal |
| Distal peak 1                | 0    | 1    | ... | 1                        | Distal peak 2   | 0    | 1    | ... | 1         |
| Proximal peak 1              | 8    | 0    | ... | 0                        | Proximal peak 2 | 0    | 4    | ... | 0         |
| ...                          |      |      |     |                          | ...             |      |      |     |           |

### D Train XGB model

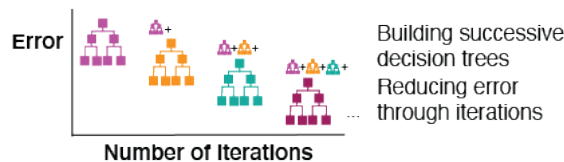

### E Predictions

|                 | PWM1 | PWM2 | ... | is.distal | Raw predicted probabilities | Predicted classes |
|-----------------|------|------|-----|-----------|-----------------------------|-------------------|
| Distal peak 1   | 0    | 1    | ... | 1         | 0.03                        | 0                 |
| Proximal peak 1 | 8    | 2    | ... | 0         | 0.16                        | 0                 |
| Distal peak 2   | 6    | 4    | ... | 1         | 0.67                        | 1                 |
| Proximal peak 2 | 0    | 0    | ... | 0         | 0.01                        | 0                 |
| ...             |      |      |     |           |                             |                   |

Prediction with same species: test dataset (30%) of peaks  
Prediction with other species: whole dataset

### F Evaluate model and predictions

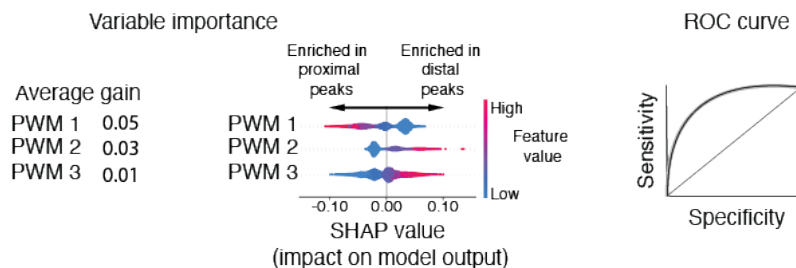

**Supplemental Fig. S9. Extreme gradient boosting machine (XGB) pipeline for the prediction of distal *cis*-regulatory regions against proximal *cis*-regulatory regions using known and *de novo* PMWs in *Amphimedon* data** (A) Motif enrichment of *Amphimedon* distal and proximal *cis*-regulatory regions. Peak state is codified in a binary variable (distal *cis*-regulatory regions = 1, proximal *cis*-regulatory regions = 0). (B) Selection of a balanced dataset of peaks (same number of distal and proximal *cis*-regulatory regions). (C) Splitting of data into ‘training’ and ‘test’ datasets. (D) training of XGB model. (E) Prediction of peaks states with *Amphimedon* test dataset and datasets of other species. (F) Evaluation of prediction performance by assessing the variable importance (average gain and SHAP values) of motifs and by analyzing ROC curves.

**A**

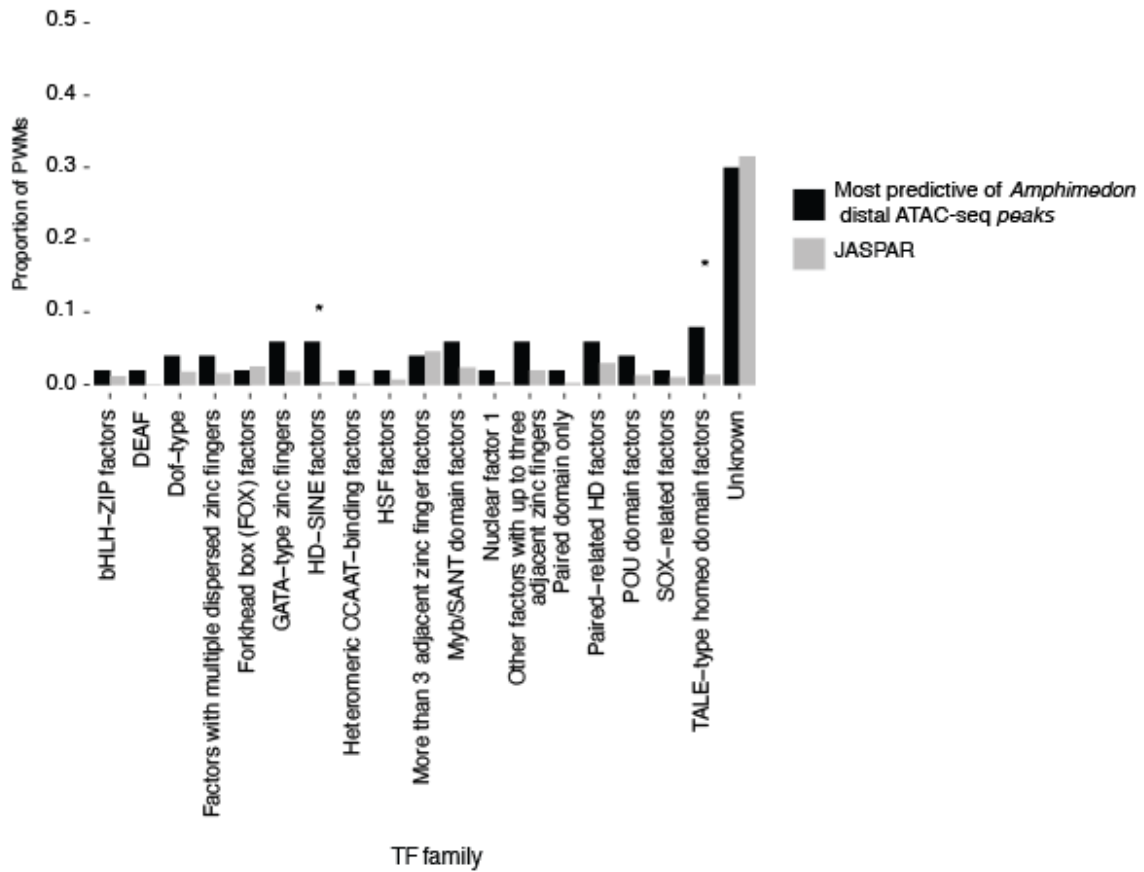

**B**

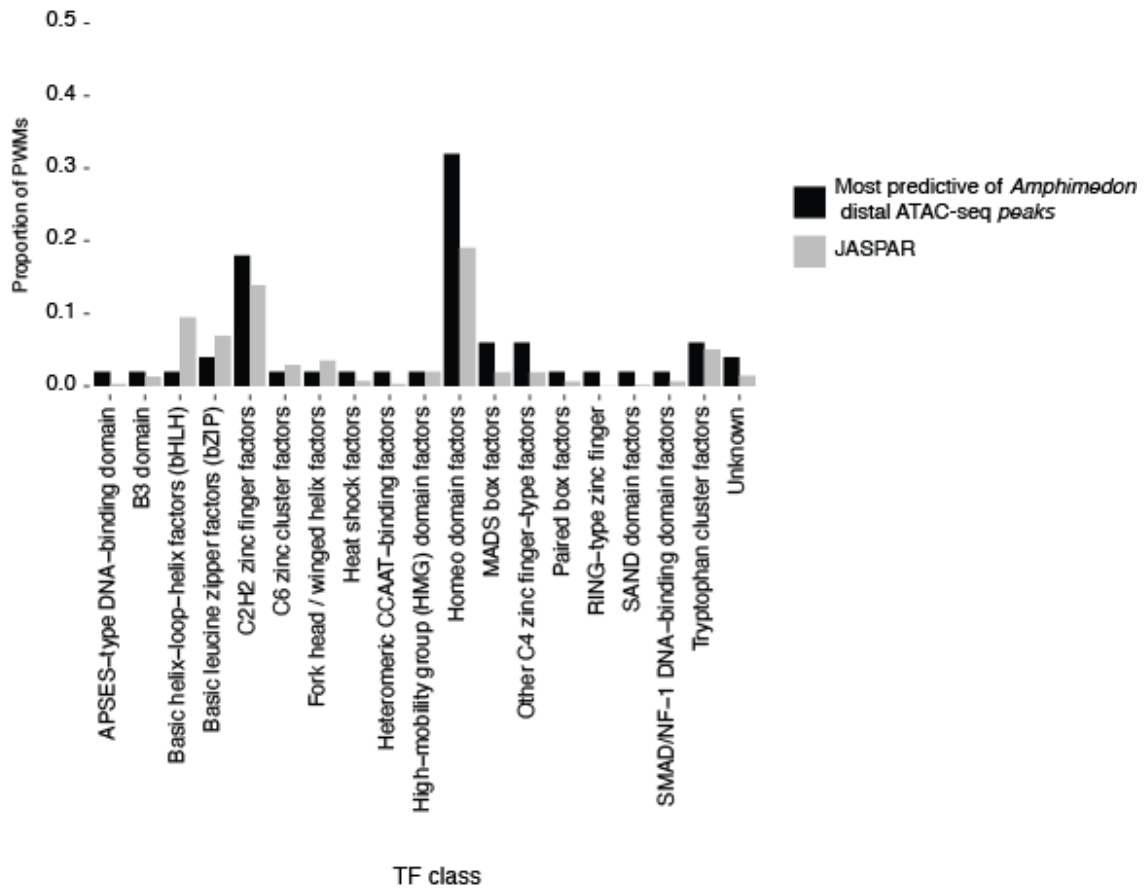

**Supplemental Fig. S10. TF families and classes of the most predictive motifs of *Amphimedon* distal ATAC-seq peaks compared to the JASPAR reference set** Proportion of unique PWMs belonging to different TF families (**A**) and classes (**B**) among the top 50 most predictive motifs of *Amphimedon* distal *cis*-regulatory regions (selected based on the greatest difference in TF motif numbers between ATAC-seq peaks and genome-wide background peak). The proportions of PWMs of the same classes and families in JASPAR database are shown (n = 1646 PWMs in JASPAR database). HD-SINE and TALE-type homeo domain factors were enriched among the most predictive motifs of distal *cis*-regulatory regions (FDR = 0.009 and FDR = 0.04, respectively).

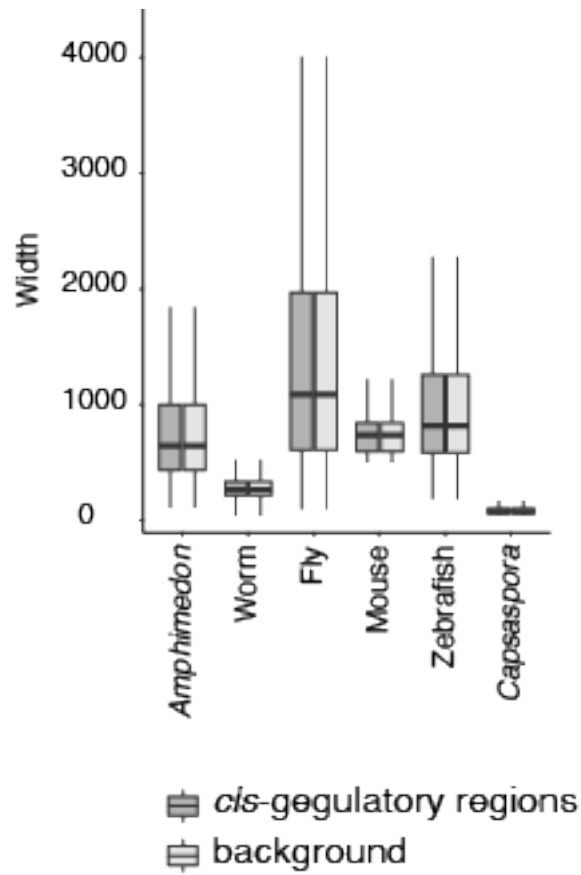

**Supplemental Fig. S11. Width of *cis*-regulatory regions across species** Width of *cis*-regulatory regions is shown for *Amphimedon*, worm, fly, mouse, zebrafish and *Capsaspora* (black) along with the corresponding background sequences (grey).

A

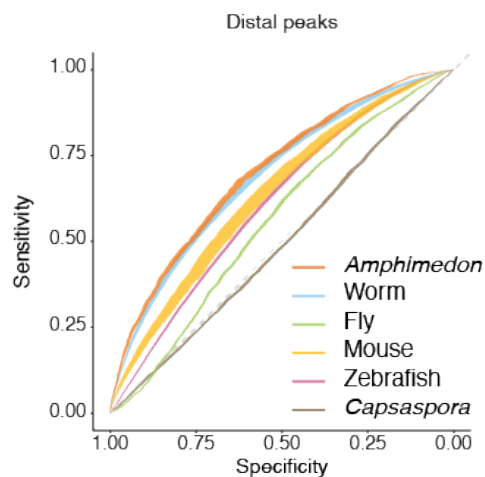

B

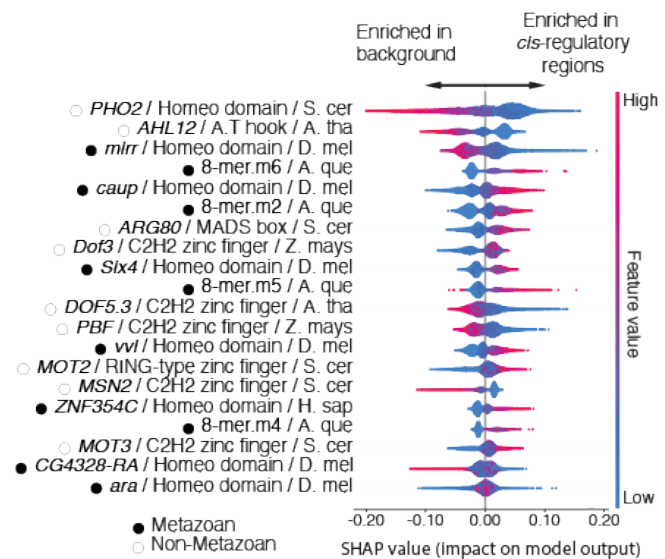

**Supplemental Fig. S12. Receiver Operating Characteristic (ROC) curves and SHAP values of XGB models trained to distinguish distal *cis*-regulatory regions from background (A) ROC curves with 95% confidence intervals of the prediction of distal *cis*-regulatory regions from background sequences in *Amphimedon*, worm, fly, mouse, zebrafish and *Capsaspora* using JASPAR motifs and *Amphimedon* 8-mers counts (n = 10 XGB models). (B) SHAP values of most important motifs and 8-mers for the prediction of distal *cis*-regulatory regions (selected based on SHAP values, n = 1 XGB model). The plot shows motif importance and effect. Motifs are ordered according to their importance. Each dot reflects the motif at a peak. Colours reflect the count of the motif and the SHAP value show the impact on the prediction. S.cer = *S. cerevisiae*, A. tha = *A. thaliana*, D. mel = *D. melanogaster*, A. que = *A. queenslandica*, Z. mays = *Z. mays*, and H. sap = *H. sapiens*. Metazoan and non-metazoan PWMs are indicated with back filled and black outlined circles, respectively.**



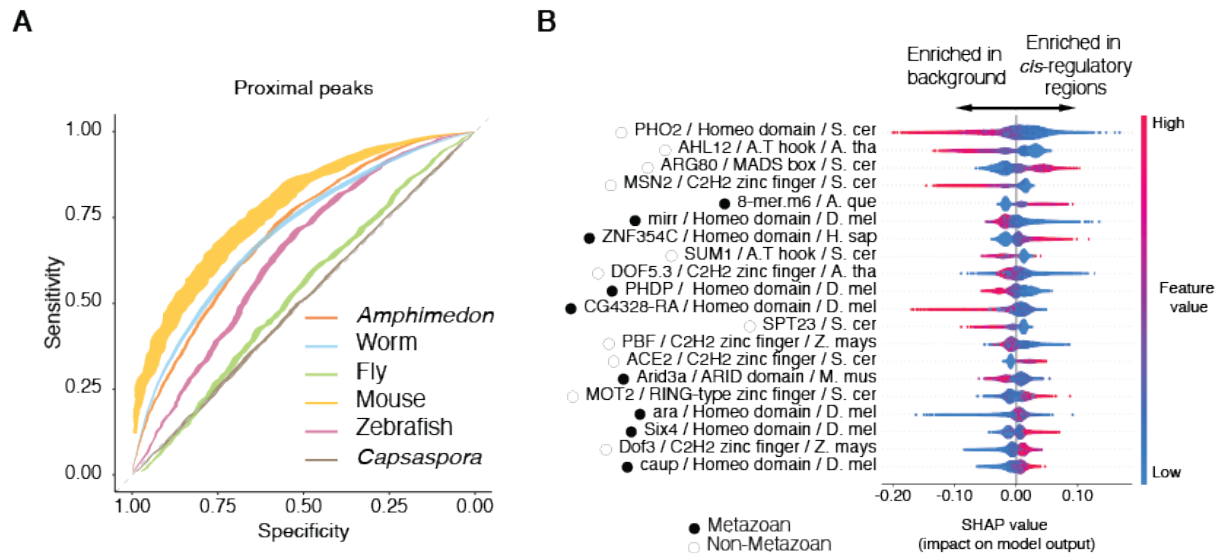

**Supplemental Fig. S13. Receiver Operating Characteristic (ROC) curves and SHAP values of XGB models trained to distinguish proximal *cis*-regulatory regions from background (A) ROC curves with 95% confidence intervals of the prediction of proximal *cis*-regulatory regions from background sequences in *Amphimedon*, worm, fly, mouse, zebrafish and *Capsaspora* using JASPAR motifs and *Amphimedon* 8-mers counts (n = 10 XGB models). (B) SHAP values of most important motifs and 8-mers for the prediction of proximal *cis*-regulatory regions (selected based on SHAP values, n = 1 XGB model). The plot shows motif importance and effect. Motifs are ordered according to their importance. Each dot reflects the motif at a peak. Colours reflect the count of the motif and the SHAP value show the impact on the prediction. *S.cer* = *S. cerevisiae*, *A. tha* = *A. thaliana*, *A. que* = *A. queenslandica*, *D. mel* = *D. melanogaster*, *H. sap* = *H. sapiens*, *Z. mays* = *Z. mays* and *M. mus* = *M. musculus*. Metazoan and non-metazoan PWMs are indicated with back filled and black outlined circles, respectively.**

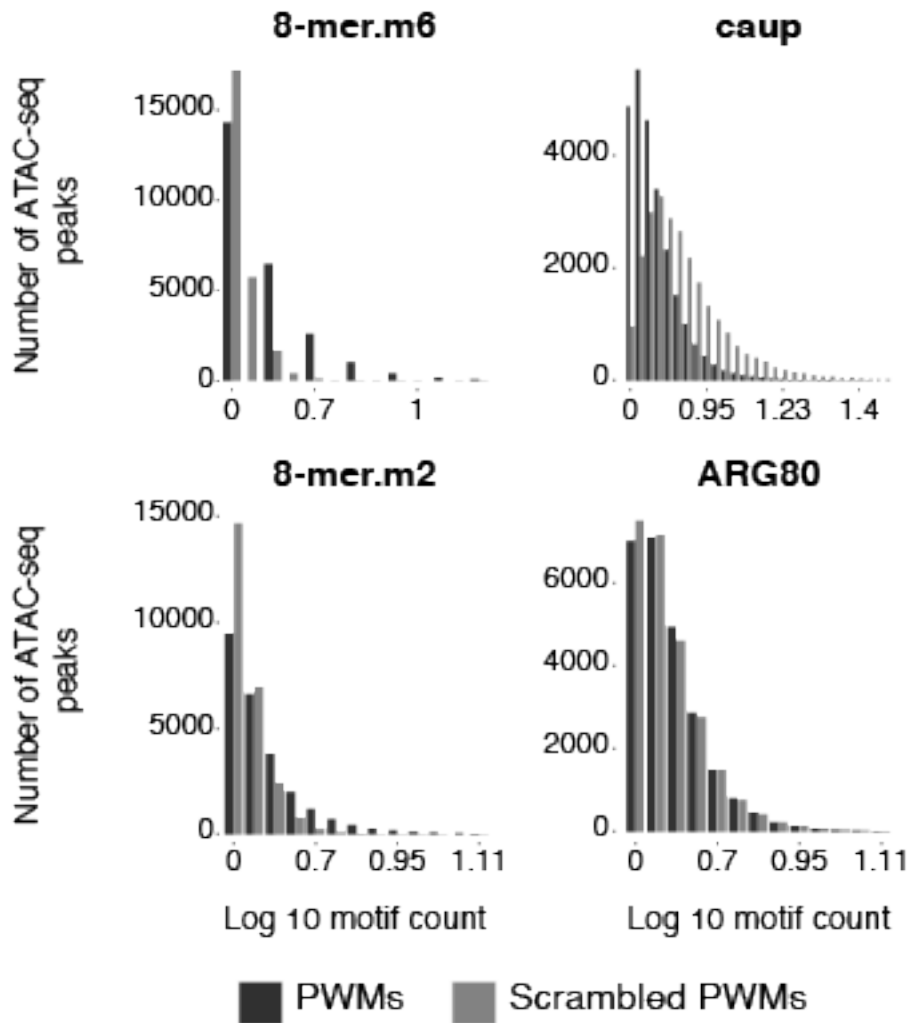

**Supplemental Fig. S14. Frequencies of motifs per peak for the top four most predictive motifs in *Amphimedon* distal regions** JASPAR and 8-mers (black) and scrambled (grey) PWMs were used to identify motifs in *Amphimedon* distal ATAC-seq peaks and motif frequency per peak is shown. Counts were transformed by base 10 logarithm ( $\log_{10}(\text{counts} + 1)$ ). Bar plots were truncated to remove values with low frequency.

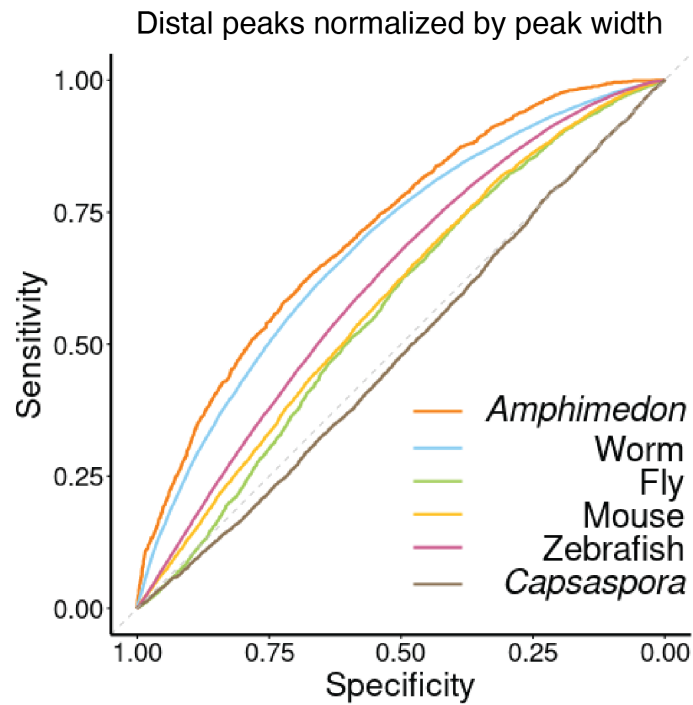

**Supplemental Fig. S15. ROC curves of the prediction of distal *cis*-regulatory regions on PWMs counts normalised by peak width** ROC curves of the prediction of distal *cis*-regulatory regions with an XGB model trained on the frequencies of JASPAR motifs plus *Amphimedon* 8-mers. These counts were adjusted for peak width by dividing the motif counts by peak width (bp) and multiplying by 10,000.

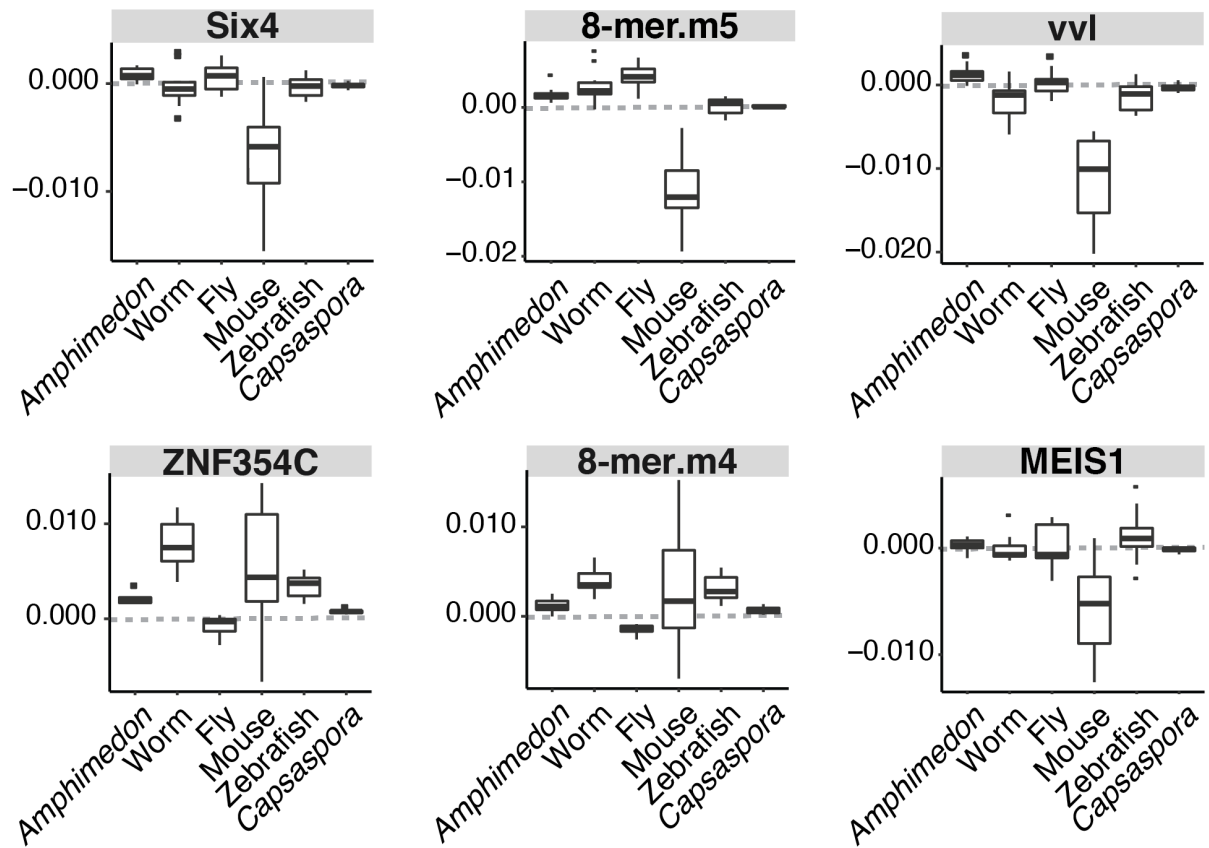

**Supplemental Fig. S16. dAUC values of most predictive motifs of *Amphimedon* distal *cis*-regulatory regions** dAUC values of highly predictive motifs and 8-mers of *Amphimedon* distal *cis*-regulatory regions (most predictive motifs shown in **Fig 5F**). Motifs were selected based on their SHAP values and their enrichment in *cis*-regulatory peak (Mann-Whitney  $U$ , FDR < 0.05).

## Legends for Supplementary Tables

**Supplemental Table S1.** Alignment statistics of *Amphimedon* ATAC-seq libraries.

**Supplemental Table S2.** FRiP scores of *Amphimedon* ATAC-seq libraries.

**Supplemental Table S3.** Number of peaks, mean peak width and mean insert size in *Amphimedon* ATAC-seq libraries.

**Supplemental Table S4.** Gene ontology (GO) process of genes neighbouring distal *Amphimedon* *cis*-regulatory regions that align to the human genome.

**Supplemental Table S5.** Accessibility deviation scores of JASPAR motifs across *Amphimedon* developmental stages.

**Supplemental Table S6.** Top *de novo* motifs (8-mers) enriched in *Amphimedon* broad developmental stages (early, mid and late).

**Supplemental Table S7.** Similarity of *Amphimedon* 8-mers and known PMWs from JASPAR database.

**Supplemental Table S8.** Pairwise synergy of top 10 motifs enriched in every broad *Amphimedon* developmental stage.

**Supplemental Table S9.** Pairwise correlation coefficients of top motifs enriched in *Amphimedon* broad developmental stages at non-co-locating peaks.

**Supplemental Table S10.** Performance statistics of 10 XGB models trained on known motifs and *de novo* *Amphimedon* *k*-mers to distinguish distal from proximal *Amphimedon* *cis*-regulatory regions.

**Supplemental Table S11.** Variable importance (average gain) of known motifs and *de novo* *Amphimedon* *k*-mers across 10 XGB models trained to distinguish *Amphimedon* distal from proximal *cis*-regulatory regions.

**Supplemental Table S12.** Pearson's correlation of average gain values across XGB models trained on known motifs and *de novo* *Amphimedon* 8-mers to distinguish *Amphimedon* distal from proximal *cis*-regulatory regions.

**Supplemental Table S13.** Enrichment of motifs in distal *cis*-regulatory regions and background peaks of *Amphimedon*, worm, fly, mouse, zebrafish and *Capsaspora* (Mann-Whitney *U* test).

**Supplemental Table S14.** Variable importance (average gain) of known motifs and *de novo* *Amphimedon* *k*-mers across 10 XGB models trained to distinguish *Amphimedon* distal *cis*-regulatory regions.

**Supplemental Table S15.** Pearson's correlation of average gain values across XGB models trained on known motifs and *de novo Amphimedon* 8-mers to distinguish *Amphimedon* distal *cis*-regulatory regions.

**Supplemental Table S16.** Variable importance (average gain) of known motifs and *de novo Amphimedon* *k*-mers across 10 XGB models trained to distinguish *Amphimedon* proximal *cis*-regulatory regions.

**Supplemental Table S17.** Pearson's correlation of average gain values across XGB models trained on known motifs and *de novo Amphimedon* 8-mers to distinguish *Amphimedon* proximal *cis*-regulatory regions.

**Supplemental Table S18.** Performance statistics of 10 XGB models trained on known motifs and *de novo Amphimedon* *k*-mers on *Amphimedon* distal *cis*-regulatory regions and background sequences.

**Supplemental Table S19.** Performance statistics of 10 XGB models trained on known motifs and *de novo Amphimedon* *k*-mers on *Amphimedon* proximal *cis*-regulatory regions and background sequences.

**Supplemental Table S20.** Metazoan motifs not found in *Amphimedon* *cis*-regulatory regions using HOMER.
