# Supplementary material for: Distal regulation, silencers, and a shared combinatorial syntax are hallmarks of animal embryogenesis
Source: HighWire-hosted journal article supplement (doi:10.1101/gr.275864.121), 2022-01-19
Supplement: Supplemental_Tables.xlsx [file Supplemental_Tables.xlsx]

## Sheet: Supplemental Table S1
Supplemental Table S1. Alignmnent statistics of Amphimedon ATAC-seq libraries.
	total_sum	duplicates_sum	mapped_sum	paired.in.sequencing_sum	read1_sum	read2_sum	properly.paired_sum	singletons_sum	with.itself.and.mate.mapped_sum	with.mate.mapped.to.a.different.chr_sum	duplicates.perc_sum	mapped.perc_sum	paired.in.sequencing.perc_sum	properly.paired.perc_sum	with.itself.and.mate.mapped.perc_sum	with.mate.mapped.to.a.different.chr.perc_sum	total_mean	duplicates_mean	mapped_mean	paired.in.sequencing_mean	read1_mean	read2_mean	properly.paired_mean	singletons_mean	with.itself.and.mate.mapped_mean	with.mate.mapped.to.a.different.chr_mean
white1_S4	132373400	0	80073329	132373400	66186700	66186700	73861684	4091617	75981712	1380974	0	60.4905	100	55.798	57.3995	1.04324	33093350	0	2.00183e+07	33093350	16546675	16546675	18465421	1.0229e+06	18995428	345244
white2_S5	69446120	0	39675450	69446120	34723060	34723060	36720816	1914676	37760774	638720	0	57.1313	100	52.8767	54.3742	0.919735	17361530	0	9.91886e+06	17361530	8680765	8680765	9180204	478669	9.44019e+06	159680
white3_S6	71678868	0	46906761	71678868	35839434	35839434	43988534	1861105	45045656	589058	0	65.4402	100	61.3689	62.8437	0.821801	17919717	0	1.17267e+07	17919717	8.95986e+06	8.95986e+06	1.09971e+07	465276	11261414	147264
brown1_S7	36292982	0	29714326	36292982	18146491	18146491	27849618	1138670	28575656	479836	0	81.8735	100	76.7355	78.736	1.32212	9.07325e+06	0	7.42858e+06	9.07325e+06	4.53662e+06	4.53662e+06	6.9624e+06	284668	7143914	119959
brown2_S8	36425774	0	27017325	36425774	18212887	18212887	25313390	1033895	25983430	410056	0	74.1709	100	69.4931	71.3325	1.12573	9.10644e+06	0	6.75433e+06	9.10644e+06	4.55322e+06	4.55322e+06	6.32835e+06	258474	6.49586e+06	102514
brown3_S9	39164444	0	26699697	39164444	19582222	19582222	24934694	1071053	25628644	422428	0	68.1733	100	63.6667	65.4385	1.0786	9791111	0	6.67492e+06	9791111	4.89556e+06	4.89556e+06	6.23367e+06	267763	6407161	105607
cloud1_S21	35738374	0	28709365	35738374	17869187	17869187	27038408	1006695	27702670	422480	0	80.332	100	75.6565	77.5152	1.18215	8.93459e+06	0	7.17734e+06	8.93459e+06	4.4673e+06	4.4673e+06	6759602	251674	6.92567e+06	105620
cloud2_S22	30914954	0	25290131	30914954	15457477	15457477	23893272	865117	24425014	316752	0	81.8055	100	77.2871	79.0071	1.02459	7.72874e+06	0	6.32253e+06	7.72874e+06	3.86437e+06	3.86437e+06	5973318	216279	6.10625e+06	79188
cloud3_S23	32004860	0	25900572	32004860	16002430	16002430	24402672	928576	24971996	346012	0	80.927	100	76.2468	78.0256	1.08112	8001215	0	6475143	8001215	4.00061e+06	4.00061e+06	6100668	232144	6242999	86503
spot1_S10	25572224	0	21024708	25572224	12786112	12786112	19858176	689666	20335042	280280	0	82.217	100	77.6553	79.52	1.09603	6393056	0	5256177	6393056	3196528	3196528	4964544	172416	5.08376e+06	70070
spot2_S11	31172990	0	25702706	31172990	15586495	15586495	24119188	991330	24711376	408494	0	82.4518	100	77.3721	79.2718	1.31041	7.79325e+06	0	6.42568e+06	7.79325e+06	3.89662e+06	3.89662e+06	6029797	247832	6177844	102124
spot3_S12	25828768	0	20682627	25828768	12914384	12914384	19483456	738643	19943984	301800	0	80.0759	100	75.4332	77.2162	1.16846	6457192	0	5.17066e+06	6457192	3228596	3228596	4870864	184661	4985996	75450
ring1_S13	22165098	0	17223259	22165098	11082549	11082549	16351544	524951	16698308	191484	0	77.7044	100	73.7716	75.336	0.863899	5.54127e+06	0	4.30581e+06	5.54127e+06	2.77064e+06	2.77064e+06	4087886	131238	4174577	47871
ring2_S14	13316528	0	10135423	13316528	6658264	6658264	9612288	309237	9826186	117738	0	76.1116	100	72.1831	73.7894	0.884149	3329132	0	2.53386e+06	3329132	1664566	1664566	2403072	77309.2	2.45655e+06	29434.5
ring3_S15	24006512	0	18554782	24006512	12003256	12003256	17571616	602568	17952214	225718	0	77.2906	100	73.1952	74.7806	0.940237	6001628	0	4.6387e+06	6001628	3000814	3000814	4392904	150642	4.48805e+06	56429.5
latering1	27816762	0	21789417	27816762	13908381	13908381	20683248	668149	21121268	246306	0	78.332	100	74.3553	75.93	0.885459	6.95419e+06	0	5.44735e+06	6.95419e+06	3.4771e+06	3.4771e+06	5170812	167037	5280317	61576.5
latering2	55164550	0	43381028	55164550	27582275	27582275	41087000	1350958	42030070	501222	0	78.6393	100	74.4808	76.1904	0.908594	1.37911e+07	0	10845257	1.37911e+07	6.89557e+06	6.89557e+06	10271750	337740	1.05075e+07	125306
larvae1_S1	30308346	0	24038530	30308346	15154173	15154173	22681048	808966	23229564	329084	0	79.3132	100	74.8343	76.6441	1.08579	7.57709e+06	0	6.00963e+06	7.57709e+06	3.78854e+06	3.78854e+06	5670262	202242	5807391	82271
larvae2_S2	26043994	0	19471035	26043994	13021997	13021997	18284352	720543	18750492	300452	0	74.7621	100	70.2056	71.9955	1.15363	6.511e+06	0	4.86776e+06	6.511e+06	3.2555e+06	3.2555e+06	4571088	180136	4687623	75113
larvae3_S3	55737050	0	45913326	55737050	27868525	27868525	42663228	1913700	43999626	954226	0	82.3749	100	76.5437	78.9414	1.71201	1.39343e+07	0	1.14783e+07	1.39343e+07	6.96713e+06	6.96713e+06	10665807	478425	1.09999e+07	238556
adult54_S19	46689304	0	38412841	46689304	23344652	23344652	36909196	847847	37564994	260114	0	82.2733	100	79.0528	80.4574	0.557117	11672326	0	9.60321e+06	11672326	5836163	5836163	9227299	211962	9.39125e+06	65028.5
adult61_S20	49644004	0	39686223	49644004	24822002	24822002	37949804	1065595	38620628	343660	0	79.9416	100	76.4439	77.7952	0.692249	12411001	0	9.92156e+06	12411001	6.2055e+06	6.2055e+06	9487451	266399	9655157	85915
adult65_S24	64758664	0	51724947	64758664	32379332	32379332	49292814	1465265	50259682	466298	0	79.8734	100	76.1177	77.6107	0.720055	16189666	0	1.29312e+07	16189666	8094833	8094833	1.23232e+07	366316	1.25649e+07	116574
Undetermined_S0	40107198	0	19290159	40107198	20053599	20053599	16246176	2300249	16989910	262444	0	48.0965	100	40.5069	42.3612	0.654356	1.00268e+07	0	4.82254e+06	1.00268e+07	5.0134e+06	5.0134e+06	4061544	575062	4.24748e+06	65611

## Sheet: Supplemental Table S2
Supplemental Table S2. FRiP scores of Amphimedon ATAC-seq libraries.
stage	aligned_reads	total_reads	FRiP
white1	21697049	51729344	0.419434
white2	10359569	25663412	0.403671
white3	9161504	30965356	0.295863
brown1	5319769	20252128	0.262677
brown2	4487995	18144726	0.247344
brown3	5209811	17934008	0.290499
cloud1	4268201	19425866	0.219717
cloud2	3356701	16961318	0.197903
cloud3	3443358	17408528	0.197797
spot1	2127377	14143588	0.150413
spot2	3910069	17208564	0.227216
spot3	2686338	13786748	0.194849
ring1	1544137	11501306	0.134258
ring2	738281	6815382	0.108326
ring3	1744201	12630132	0.138098
latering1	1777664	14732088	0.120666
latering2	5726613	28767228	0.199067
larvae1	3505962	16297708	0.21512
larvae2	2685416	13187220	0.203638
larvae3	11787206	31239180	0.377321
adult54	4237545	25929572	0.163425
adult61	5267365	27262530	0.193209
adult65	10566566	35393808	0.298543

## Sheet: Supplemental Table S3
Supplemental Table S3. Number of peaks, mean peak width and mean insert size in Amphimedon ATAC-seq libraries.
Library	Number of peaks	Mean peak width	Mean insert size
white1	26163	284.049	121.795
white2	14535	284.888	110.322
white3	17689	255.272	114.578
brown1	25240	416.117	180.303
brown2	21139	360.394	161.06
brown3	18448	365.625	155.126
cloud1	22925	386.807	169.268
cloud2	19670	335.902	153.231
cloud3	18222	338.053	156.511
spot1	15474	337.742	158.07
spot2	22063	407.296	176.09
spot3	19225	360.13	166.022
ring1	10255	280.146	134.503
ring2	6160	275.932	138.183
ring3	13502	314.019	151.842
latering1	11526	302.803	141.751
latering2	18753	320.991	133.618
larvae1	21194	363.636	158.695
larvae2	17399	367.188	155.647
larvae3	32690	537.642	200.433
adult54	23930	259.725	116.437
adult61	26833	301.033	137.193
adult65	38263	342.165	139.902

## Sheet: Supplemental Table S4
Supplemental Table S4. Gene ontology (GO) process of genes neighbouring distal Amphimedon cis-regulatory regions that align to the human genome.
GO Term	Description	P-value	FDR q-value	Enrichment	N	B	n	b	Genes
GO:0071310	cellular response to organic substance	1.82e-13	2.02e-09	2.63	5073	339	359	63	[PRKACA - protein kinase, camp-dependent, catalytic, alpha, MTOR - mechanistic target of rapamycin (serine/threonine kinase), ABCA1 - atp-binding cassette, sub-family a (abc1), member 1, CDC34 - cell division cycle 34, XRN1 - 5'-3' exoribonuclease 1, MARS - methionyl-trna synthetase, ABL1 - c-abl oncogene 1, non-receptor tyrosine kinase, DSTYK - dual serine/threonine and tyrosine protein kinase, …
GO:0070887	cellular response to chemical stimulus	3.84e-13	2.14e-09	2.39	5073	426	359	72	[MTR - 5-methyltetrahydrofolate-homocysteine methyltransferase, PRKACA - protein kinase, camp-dependent, catalytic, alpha, MTOR - mechanistic target of rapamycin (serine/threonine kinase), ABCA1 - atp-binding cassette, sub-family a (abc1), member 1, CDC34 - cell division cycle 34, XRN1 - 5'-3' exoribonuclease 1, MARS - methionyl-trna synthetase, ABL1 - c-abl oncogene 1, non-receptor tyrosine kina…
GO:0010033	response to organic substance	5.51e-12	2.05e-08	2.11	5073	557	359	83	[RGS19 - regulator of g-protein signaling 19, PRKACA - protein kinase, camp-dependent, catalytic, alpha, MTOR - mechanistic target of rapamycin (serine/threonine kinase), ABCA1 - atp-binding cassette, sub-family a (abc1), member 1, CDC34 - cell division cycle 34, XRN1 - 5'-3' exoribonuclease 1, ANXA7 - annexin a7, MARS - methionyl-trna synthetase, AGL - amylo-alpha-1, 6-glucosidase, 4-alpha-gluca…
GO:0042221	response to chemical	6e-12	1.67e-08	1.95	5073	703	359	97	[RGS19 - regulator of g-protein signaling 19, ABCA1 - atp-binding cassette, sub-family a (abc1), member 1, CDC34 - cell division cycle 34, ANXA7 - annexin a7, XRN1 - 5'-3' exoribonuclease 1, SCAP - srebf chaperone, ABL1 - c-abl oncogene 1, non-receptor tyrosine kinase, IQGAP1 - iq motif containing gtpase activating protein 1, HTRA2 - htra serine peptidase 2, C2CD5 - c2 calcium-dependent domain co…
GO:0051716	cellular response to stimulus	1.88e-11	4.2e-08	1.76	5073	949	359	118	[REV3L - rev3-like, polymerase (dna directed), zeta, catalytic subunit, ABCA1 - atp-binding cassette, sub-family a (abc1), member 1, CDC34 - cell division cycle 34, XRN1 - 5'-3' exoribonuclease 1, SCAP - srebf chaperone, ABL1 - c-abl oncogene 1, non-receptor tyrosine kinase, IQGAP1 - iq motif containing gtpase activating protein 1, HTRA2 - htra serine peptidase 2, C2CD5 - c2 calcium-dependent dom…
GO:0071495	cellular response to endogenous stimulus	2.75e-11	5.11e-08	3.08	5073	188	359	41	[DDX18 - dead (asp-glu-ala-asp) box polypeptide 18, PRKACA - protein kinase, camp-dependent, catalytic, alpha, ACVR2A - activin a receptor, type iia, EEF1A1 - eukaryotic translation elongation factor 1 alpha 1, MTOR - mechanistic target of rapamycin (serine/threonine kinase), DAB2IP - dab2 interacting protein, XRN1 - 5'-3' exoribonuclease 1, MARS - methionyl-trna synthetase, EIF4A3 - eukaryotic t…
GO:0050896	response to stimulus	4.91e-11	7.82e-08	1.58	5073	1344	359	150	[RGS19 - regulator of g-protein signaling 19, SLC4A10 - solute carrier family 4, sodium bicarbonate transporter, member 10, REV3L - rev3-like, polymerase (dna directed), zeta, catalytic subunit, ABCA1 - atp-binding cassette, sub-family a (abc1), member 1, CDC34 - cell division cycle 34, ANXA7 - annexin a7, XRN1 - 5'-3' exoribonuclease 1, SCAP - srebf chaperone, ABL1 - c-abl oncogene 1, non-recept…
GO:1901701	cellular response to oxygen-containing compound	6.61e-11	9.21e-08	2.91	5073	209	359	43	[MTR - 5-methyltetrahydrofolate-homocysteine methyltransferase, DDX18 - dead (asp-glu-ala-asp) box polypeptide 18, PRKACA - protein kinase, camp-dependent, catalytic, alpha, MTOR - mechanistic target of rapamycin (serine/threonine kinase), ABCA1 - atp-binding cassette, sub-family a (abc1), member 1, CTR9 - ctr9, paf1/rna polymerase ii complex component, CDC73 - cell division cycle 73, MARS - meth…
GO:0009719	response to endogenous stimulus	5.99e-10	7.41e-07	2.52	5073	275	359	49	[PRKACA - protein kinase, camp-dependent, catalytic, alpha, MTOR - mechanistic target of rapamycin (serine/threonine kinase), ABCA1 - atp-binding cassette, sub-family a (abc1), member 1, XRN1 - 5'-3' exoribonuclease 1, MARS - methionyl-trna synthetase, AGL - amylo-alpha-1, 6-glucosidase, 4-alpha-glucanotransferase, SCAP - srebf chaperone, ABL1 - c-abl oncogene 1, non-receptor tyrosine kinase, DST…
GO:0009987	cellular process	1.16e-09	1.29e-06	1.12	5073	4260	359	338	[RGS19 - regulator of g-protein signaling 19, MEX3C - mex-3 rna binding family member c, MAPRE3 - microtubule-associated protein, rp/eb family, member 3, MCCC1 - methylcrotonoyl-coa carboxylase 1 (alpha), REV3L - rev3-like, polymerase (dna directed), zeta, catalytic subunit, SUCLA2 - succinate-coa ligase, adp-forming, beta subunit, SUCLG1 - succinate-coa ligase, alpha subunit, ELOF1 - elongation …
GO:1901700	response to oxygen-containing compound	1.18e-09	1.19e-06	2.28	5073	354	359	57	[RGS19 - regulator of g-protein signaling 19, MTR - 5-methyltetrahydrofolate-homocysteine methyltransferase, PRKACA - protein kinase, camp-dependent, catalytic, alpha, MTOR - mechanistic target of rapamycin (serine/threonine kinase), ABCA1 - atp-binding cassette, sub-family a (abc1), member 1, XRN1 - 5'-3' exoribonuclease 1, MARS - methionyl-trna synthetase, SCAP - srebf chaperone, ABL1 - c-abl o…
GO:0044238	primary metabolic process	2.63e-09	2.44e-06	1.27	5073	2728	359	246	[MEX3C - mex-3 rna binding family member c, MCCC1 - methylcrotonoyl-coa carboxylase 1 (alpha), REV3L - rev3-like, polymerase (dna directed), zeta, catalytic subunit, SUCLA2 - succinate-coa ligase, adp-forming, beta subunit, SUCLG1 - succinate-coa ligase, alpha subunit, ELOF1 - elongation factor 1 homolog (s. cerevisiae), ABCA1 - atp-binding cassette, sub-family a (abc1), member 1, GFM2 - g elonga…
GO:0071704	organic substance metabolic process	8.61e-09	7.38e-06	1.25	5073	2859	359	253	[MEX3C - mex-3 rna binding family member c, MCCC1 - methylcrotonoyl-coa carboxylase 1 (alpha), REV3L - rev3-like, polymerase (dna directed), zeta, catalytic subunit, SUCLA2 - succinate-coa ligase, adp-forming, beta subunit, SUCLG1 - succinate-coa ligase, alpha subunit, ELOF1 - elongation factor 1 homolog (s. cerevisiae), ABCA1 - atp-binding cassette, sub-family a (abc1), member 1, GFM2 - g elonga…
GO:0044237	cellular metabolic process	9.21e-09	7.33e-06	1.24	5073	2921	359	257	[RGS19 - regulator of g-protein signaling 19, MEX3C - mex-3 rna binding family member c, MCCC1 - methylcrotonoyl-coa carboxylase 1 (alpha), REV3L - rev3-like, polymerase (dna directed), zeta, catalytic subunit, SUCLA2 - succinate-coa ligase, adp-forming, beta subunit, SUCLG1 - succinate-coa ligase, alpha subunit, ELOF1 - elongation factor 1 homolog (s. cerevisiae), ABCA1 - atp-binding cassette, s…
GO:0048511	rhythmic process	2.4e-08	1.78e-05	3.96	5073	75	359	21	[BTBD9 - btb (poz) domain containing 9, MAPK9 - mitogen-activated protein kinase 9, CDK5 - cyclin-dependent kinase 5, USP9X - ubiquitin specific peptidase 9, x-linked, OGT - o-linked n-acetylglucosamine (glcnac) transferase, DYRK1A - dual-specificity tyrosine-(y)-phosphorylation regulated kinase 1a, MTOR - mechanistic target of rapamycin (serine/threonine kinase), KDM5A - lysine (k)-specific deme…
GO:0008152	metabolic process	3.16e-08	2.2e-05	1.22	5073	3087	359	266	[RGS19 - regulator of g-protein signaling 19, MEX3C - mex-3 rna binding family member c, MCCC1 - methylcrotonoyl-coa carboxylase 1 (alpha), REV3L - rev3-like, polymerase (dna directed), zeta, catalytic subunit, SUCLA2 - succinate-coa ligase, adp-forming, beta subunit, SUCLG1 - succinate-coa ligase, alpha subunit, ELOF1 - elongation factor 1 homolog (s. cerevisiae), ABCA1 - atp-binding cassette, s…
GO:0006807	nitrogen compound metabolic process	6.43e-08	4.22e-05	1.26	5073	2595	359	232	[MEX3C - mex-3 rna binding family member c, MCCC1 - methylcrotonoyl-coa carboxylase 1 (alpha), REV3L - rev3-like, polymerase (dna directed), zeta, catalytic subunit, SUCLA2 - succinate-coa ligase, adp-forming, beta subunit, ABCA1 - atp-binding cassette, sub-family a (abc1), member 1, ELOF1 - elongation factor 1 homolog (s. cerevisiae), GFM2 - g elongation factor, mitochondrial 2, DYRK4 - dual-spe…
GO:0071363	cellular response to growth factor stimulus	7.79e-08	4.82e-05	3.87	5073	73	359	20	[CAD - carbamoyl-phosphate synthetase 2, aspartate transcarbamylase, and dihydroorotase, ACVR2A - activin a receptor, type iia, EEF1A1 - eukaryotic translation elongation factor 1 alpha 1, MARS - methionyl-trna synthetase, DAB2IP - dab2 interacting protein, EIF4A3 - eukaryotic translation initiation factor 4a3, HTRA2 - htra serine peptidase 2, DSTYK - dual serine/threonine and tyrosine protein ki…
GO:0018105	peptidyl-serine phosphorylation	9.06e-08	5.31e-05	4.01	5073	67	359	19	[MAPK9 - mitogen-activated protein kinase 9, CDK5 - cyclin-dependent kinase 5, PCK1 - phosphoenolpyruvate carboxykinase 1 (soluble), PRKACA - protein kinase, camp-dependent, catalytic, alpha, DYRK1A - dual-specificity tyrosine-(y)-phosphorylation regulated kinase 1a, MTOR - mechanistic target of rapamycin (serine/threonine kinase), DYRK4 - dual-specificity tyrosine-(y)-phosphorylation regulated k…
GO:0051172	negative regulation of nitrogen compound metabolic process	1.04e-07	5.8e-05	1.77	5073	632	359	79	[XDH - xanthine dehydrogenase, MTOR - mechanistic target of rapamycin (serine/threonine kinase), XPO1 - exportin 1 (crm1 homolog, yeast), KDM2B - lysine (k)-specific demethylase 2b, RPL11 - ribosomal protein l11, XRN1 - 5'-3' exoribonuclease 1, VPS35 - vacuolar protein sorting 35 homolog (s. cerevisiae), ABL1 - c-abl oncogene 1, non-receptor tyrosine kinase, TNKS - tankyrase, trf1-interacting ank…
GO:0070848	response to growth factor	1.31e-07	6.97e-05	3.62	5073	82	359	21	[CAD - carbamoyl-phosphate synthetase 2, aspartate transcarbamylase, and dihydroorotase, ACVR2A - activin a receptor, type iia, EEF1A1 - eukaryotic translation elongation factor 1 alpha 1, CDC34 - cell division cycle 34, MARS - methionyl-trna synthetase, DAB2IP - dab2 interacting protein, EIF4A3 - eukaryotic translation initiation factor 4a3, HTRA2 - htra serine peptidase 2, DSTYK - dual serine/t…
GO:0018209	peptidyl-serine modification	4.02e-07	0.000204	3.68	5073	73	359	19	[CDK5 - cyclin-dependent kinase 5, MAPK9 - mitogen-activated protein kinase 9, PCK1 - phosphoenolpyruvate carboxykinase 1 (soluble), PRKACA - protein kinase, camp-dependent, catalytic, alpha, DYRK1A - dual-specificity tyrosine-(y)-phosphorylation regulated kinase 1a, MTOR - mechanistic target of rapamycin (serine/threonine kinase), DYRK4 - dual-specificity tyrosine-(y)-phosphorylation regulated k…
GO:0006928	movement of cell or subcellular component	4.54e-07	0.00022	2.03	5073	355	359	51	[USH2A - usher syndrome 2a (autosomal recessive, mild), ABL1 - c-abl oncogene 1, non-receptor tyrosine kinase, IQGAP1 - iq motif containing gtpase activating protein 1, DNAH3 - dynein, axonemal, heavy chain 3, DYNC2H1 - dynein, cytoplasmic 2, heavy chain 1, FBXO45 - f-box protein 45, DNAH7 - dynein, axonemal, heavy chain 7, NOTCH1 - notch 1, AP3B2 - adaptor-related protein complex 3, beta 2 subun…
GO:0031324	negative regulation of cellular metabolic process	5.62e-07	0.000261	1.68	5073	691	359	82	[XDH - xanthine dehydrogenase, MTOR - mechanistic target of rapamycin (serine/threonine kinase), XPO1 - exportin 1 (crm1 homolog, yeast), KDM2B - lysine (k)-specific demethylase 2b, RPL11 - ribosomal protein l11, XRN1 - 5'-3' exoribonuclease 1, VPS35 - vacuolar protein sorting 35 homolog (s. cerevisiae), ABL1 - c-abl oncogene 1, non-receptor tyrosine kinase, HTRA2 - htra serine peptidase 2, IQGAP…
GO:0009890	negative regulation of biosynthetic process	9.39e-07	0.000418	1.94	5073	394	359	54	[XPO1 - exportin 1 (crm1 homolog, yeast), KDM2B - lysine (k)-specific demethylase 2b, XRN1 - 5'-3' exoribonuclease 1, SCAP - srebf chaperone, UPF1 - upf1 regulator of nonsense transcripts homolog (yeast), NOTCH1 - notch 1, ACADVL - acyl-coa dehydrogenase, very long chain, WT1 - wilms tumor 1, TBL1XR1 - transducin (beta)-like 1 x-linked receptor 1, AGO2 - argonaute risc catalytic component 2, WWP2…
GO:0009891	positive regulation of biosynthetic process	1.33e-06	0.00057	1.76	5073	537	359	67	[MAPRE3 - microtubule-associated protein, rp/eb family, member 3, MTOR - mechanistic target of rapamycin (serine/threonine kinase), ELOF1 - elongation factor 1 homolog (s. cerevisiae), MARS - methionyl-trna synthetase, VPS35 - vacuolar protein sorting 35 homolog (s. cerevisiae), SCAP - srebf chaperone, EIF3D - eukaryotic translation initiation factor 3, subunit d, ABL1 - c-abl oncogene 1, non-rec…
GO:0009889	regulation of biosynthetic process	1.49e-06	0.000613	1.48	5073	1100	359	115	[MAPRE3 - microtubule-associated protein, rp/eb family, member 3, ELOF1 - elongation factor 1 homolog (s. cerevisiae), XRN1 - 5'-3' exoribonuclease 1, SCAP - srebf chaperone, ABL1 - c-abl oncogene 1, non-receptor tyrosine kinase, UPF1 - upf1 regulator of nonsense transcripts homolog (yeast), PSMA2 - proteasome (prosome, macropain) subunit, alpha type, 2, GTF2B - general transcription factor iib, …
GO:0010628	positive regulation of gene expression	1.49e-06	0.000594	1.79	5073	506	359	64	[MAPRE3 - microtubule-associated protein, rp/eb family, member 3, MTOR - mechanistic target of rapamycin (serine/threonine kinase), ELOF1 - elongation factor 1 homolog (s. cerevisiae), RPL11 - ribosomal protein l11, MARS - methionyl-trna synthetase, VPS35 - vacuolar protein sorting 35 homolog (s. cerevisiae), SCAP - srebf chaperone, EIF3D - eukaryotic translation initiation factor 3, subunit d, A…
GO:0071396	cellular response to lipid	1.5e-06	0.000577	3.4	5073	79	359	19	[DDX18 - dead (asp-glu-ala-asp) box polypeptide 18, PCK1 - phosphoenolpyruvate carboxykinase 1 (soluble), ABCA1 - atp-binding cassette, sub-family a (abc1), member 1, CTR9 - ctr9, paf1/rna polymerase ii complex component, CDC73 - cell division cycle 73, PHB2 - prohibitin 2, DAB2IP - dab2 interacting protein, CACTIN - cactin, spliceosome c complex subunit, ABL1 - c-abl oncogene 1, non-receptor tyr…
GO:0031328	positive regulation of cellular biosynthetic process	1.52e-06	0.000564	1.77	5073	528	359	66	[MAPRE3 - microtubule-associated protein, rp/eb family, member 3, MTOR - mechanistic target of rapamycin (serine/threonine kinase), ELOF1 - elongation factor 1 homolog (s. cerevisiae), MARS - methionyl-trna synthetase, VPS35 - vacuolar protein sorting 35 homolog (s. cerevisiae), SCAP - srebf chaperone, EIF3D - eukaryotic translation initiation factor 3, subunit d, ABL1 - c-abl oncogene 1, non-rec…
GO:0010558	negative regulation of macromolecule biosynthetic process	1.52e-06	0.000547	1.95	5073	369	359	51	[XPO1 - exportin 1 (crm1 homolog, yeast), KDM2B - lysine (k)-specific demethylase 2b, XRN1 - 5'-3' exoribonuclease 1, UPF1 - upf1 regulator of nonsense transcripts homolog (yeast), NOTCH1 - notch 1, WT1 - wilms tumor 1, TBL1XR1 - transducin (beta)-like 1 x-linked receptor 1, AGO2 - argonaute risc catalytic component 2, WWP2 - ww domain containing e3 ubiquitin protein ligase 2, GTPBP4 - gtp bindin…
GO:0065008	regulation of biological quality	1.6e-06	0.000557	1.5	5073	1028	359	109	[MEX3C - mex-3 rna binding family member c, SLC4A10 - solute carrier family 4, sodium bicarbonate transporter, member 10, ABCA1 - atp-binding cassette, sub-family a (abc1), member 1, ANXA7 - annexin a7, XRN1 - 5'-3' exoribonuclease 1, ABCB7 - atp-binding cassette, sub-family b (mdr/tap), member 7, ABL1 - c-abl oncogene 1, non-receptor tyrosine kinase, RDX - radixin, UPF1 - upf1 regulator of nonse…
GO:0010557	positive regulation of macromolecule biosynthetic process	1.72e-06	0.00058	1.78	5073	508	359	64	[MAPRE3 - microtubule-associated protein, rp/eb family, member 3, MTOR - mechanistic target of rapamycin (serine/threonine kinase), ELOF1 - elongation factor 1 homolog (s. cerevisiae), MARS - methionyl-trna synthetase, SCAP - srebf chaperone, EIF3D - eukaryotic translation initiation factor 3, subunit d, ABL1 - c-abl oncogene 1, non-receptor tyrosine kinase, FOXJ3 - forkhead box j3, TNKS - tankyr…
GO:0006468	protein phosphorylation	1.79e-06	0.000588	2.14	5073	271	359	41	[GRK5 - g protein-coupled receptor kinase 5, TEC - tec protein tyrosine kinase, PRKACA - protein kinase, camp-dependent, catalytic, alpha, ACVR2A - activin a receptor, type iia, CCNE1 - cyclin e1, MTOR - mechanistic target of rapamycin (serine/threonine kinase), CDK14 - cyclin-dependent kinase 14, RIOK1 - rio kinase 1, DYRK4 - dual-specificity tyrosine-(y)-phosphorylation regulated kinase 4, DAB2…
GO:1901698	response to nitrogen compound	1.79e-06	0.000571	2.14	5073	271	359	41	[MTR - 5-methyltetrahydrofolate-homocysteine methyltransferase, PRKACA - protein kinase, camp-dependent, catalytic, alpha, MTOR - mechanistic target of rapamycin (serine/threonine kinase), ABCA1 - atp-binding cassette, sub-family a (abc1), member 1, MARS - methionyl-trna synthetase, XRN1 - 5'-3' exoribonuclease 1, SCAP - srebf chaperone, ABL1 - c-abl oncogene 1, non-receptor tyrosine kinase, IQGA…
GO:0045934	negative regulation of nucleobase-containing compound metabolic process	1.9e-06	0.000588	1.92	5073	382	359	52	[MTOR - mechanistic target of rapamycin (serine/threonine kinase), XPO1 - exportin 1 (crm1 homolog, yeast), KDM2B - lysine (k)-specific demethylase 2b, XRN1 - 5'-3' exoribonuclease 1, TNKS - tankyrase, trf1-interacting ankyrin-related adp-ribose polymerase, NOTCH1 - notch 1, WT1 - wilms tumor 1, TBL1XR1 - transducin (beta)-like 1 x-linked receptor 1, PPP3CA - protein phosphatase 3, catalytic subu…
GO:0051173	positive regulation of nitrogen compound metabolic process	1.9e-06	0.000573	1.56	5073	863	359	95	[XDH - xanthine dehydrogenase, MAPRE3 - microtubule-associated protein, rp/eb family, member 3, PRKACA - protein kinase, camp-dependent, catalytic, alpha, MTOR - mechanistic target of rapamycin (serine/threonine kinase), ELOF1 - elongation factor 1 homolog (s. cerevisiae), MARS - methionyl-trna synthetase, VPS35 - vacuolar protein sorting 35 homolog (s. cerevisiae), SCAP - srebf chaperone, EIF3D …
GO:0051254	positive regulation of RNA metabolic process	2e-06	0.000586	1.85	5073	435	359	57	[MAPRE3 - microtubule-associated protein, rp/eb family, member 3, MTOR - mechanistic target of rapamycin (serine/threonine kinase), ELOF1 - elongation factor 1 homolog (s. cerevisiae), MARS - methionyl-trna synthetase, SCAP - srebf chaperone, ABL1 - c-abl oncogene 1, non-receptor tyrosine kinase, FOXJ3 - forkhead box j3, TNKS - tankyrase, trf1-interacting ankyrin-related adp-ribose polymerase, UP…
GO:0033993	response to lipid	2.01e-06	0.000576	2.49	5073	170	359	30	[DDX18 - dead (asp-glu-ala-asp) box polypeptide 18, ABCA1 - atp-binding cassette, sub-family a (abc1), member 1, CTR9 - ctr9, paf1/rna polymerase ii complex component, CDC73 - cell division cycle 73, DAB2IP - dab2 interacting protein, XRN1 - 5'-3' exoribonuclease 1, AGL - amylo-alpha-1, 6-glucosidase, 4-alpha-glucanotransferase, ABL1 - c-abl oncogene 1, non-receptor tyrosine kinase, HTRA2 - htra …
GO:0043279	response to alkaloid	2.23e-06	0.00062	5.89	5073	24	359	10	[RAD51 - rad51 recombinase, EFTUD2 - elongation factor tu gtp binding domain containing 2, CAD - carbamoyl-phosphate synthetase 2, aspartate transcarbamylase, and dihydroorotase, HDAC2 - histone deacetylase 2, PRKCE - protein kinase c, epsilon, PPP2R2A - protein phosphatase 2, regulatory subunit b, alpha, HSPA5 - heat shock 70kda protein 5 (glucose-regulated protein, 78kda), DNMT3A - dna (cytosin…
GO:0010243	response to organonitrogen compound	2.25e-06	0.000611	2.17	5073	254	359	39	[PRKACA - protein kinase, camp-dependent, catalytic, alpha, MTOR - mechanistic target of rapamycin (serine/threonine kinase), ABCA1 - atp-binding cassette, sub-family a (abc1), member 1, MARS - methionyl-trna synthetase, XRN1 - 5'-3' exoribonuclease 1, SCAP - srebf chaperone, ABL1 - c-abl oncogene 1, non-receptor tyrosine kinase, IQGAP1 - iq motif containing gtpase activating protein 1, C2CD5 - c…
GO:1901360	organic cyclic compound metabolic process	2.28e-06	0.000604	1.38	5073	1463	359	143	[MCCC1 - methylcrotonoyl-coa carboxylase 1 (alpha), REV3L - rev3-like, polymerase (dna directed), zeta, catalytic subunit, SUCLA2 - succinate-coa ligase, adp-forming, beta subunit, ABCA1 - atp-binding cassette, sub-family a (abc1), member 1, ELOF1 - elongation factor 1 homolog (s. cerevisiae), CDC34 - cell division cycle 34, XRN1 - 5'-3' exoribonuclease 1, SCAP - srebf chaperone, ABL1 - c-abl onc…
GO:0008150	biological_process	2.29e-06	0.000594	1.05	5073	4773	359	355	[RGS19 - regulator of g-protein signaling 19, MEX3C - mex-3 rna binding family member c, MAPRE3 - microtubule-associated protein, rp/eb family, member 3, MCCC1 - methylcrotonoyl-coa carboxylase 1 (alpha), REV3L - rev3-like, polymerase (dna directed), zeta, catalytic subunit, SUCLA2 - succinate-coa ligase, adp-forming, beta subunit, SUCLG1 - succinate-coa ligase, alpha subunit, ELOF1 - elongation …
GO:0031327	negative regulation of cellular biosynthetic process	2.42e-06	0.000612	1.91	5073	385	359	52	[XPO1 - exportin 1 (crm1 homolog, yeast), KDM2B - lysine (k)-specific demethylase 2b, XRN1 - 5'-3' exoribonuclease 1, UPF1 - upf1 regulator of nonsense transcripts homolog (yeast), NOTCH1 - notch 1, ACADVL - acyl-coa dehydrogenase, very long chain, WT1 - wilms tumor 1, TBL1XR1 - transducin (beta)-like 1 x-linked receptor 1, AGO2 - argonaute risc catalytic component 2, WWP2 - ww domain containing …
GO:0051253	negative regulation of RNA metabolic process	2.5e-06	0.000618	2.01	5073	324	359	46	[CNOT1 - ccr4-not transcription complex, subunit 1, ABCE1 - atp-binding cassette, sub-family e (oabp), member 1, CCNE1 - cyclin e1, PABPC1 - poly(a) binding protein, cytoplasmic 1, MTOR - mechanistic target of rapamycin (serine/threonine kinase), XPO1 - exportin 1 (crm1 homolog, yeast), CTR9 - ctr9, paf1/rna polymerase ii complex component, KDM2B - lysine (k)-specific demethylase 2b, CDC73 - cell…
GO:0042493	response to drug	2.53e-06	0.000612	2.31	5073	208	359	34	[RGS19 - regulator of g-protein signaling 19, MTR - 5-methyltetrahydrofolate-homocysteine methyltransferase, RAD54L - rad54-like (s. cerevisiae), MTOR - mechanistic target of rapamycin (serine/threonine kinase), XPO1 - exportin 1 (crm1 homolog, yeast), ABCA1 - atp-binding cassette, sub-family a (abc1), member 1, XRN1 - 5'-3' exoribonuclease 1, ABL1 - c-abl oncogene 1, non-receptor tyrosine kinase…
GO:0043170	macromolecule metabolic process	2.72e-06	0.000644	1.26	5073	2262	359	202	[MEX3C - mex-3 rna binding family member c, REV3L - rev3-like, polymerase (dna directed), zeta, catalytic subunit, ABCA1 - atp-binding cassette, sub-family a (abc1), member 1, ELOF1 - elongation factor 1 homolog (s. cerevisiae), GFM2 - g elongation factor, mitochondrial 2, DYRK4 - dual-specificity tyrosine-(y)-phosphorylation regulated kinase 4, ABL1 - c-abl oncogene 1, non-receptor tyrosine kina…
GO:0014070	response to organic cyclic compound	2.94e-06	0.000682	2.37	5073	191	359	32	[DDX18 - dead (asp-glu-ala-asp) box polypeptide 18, PRKACA - protein kinase, camp-dependent, catalytic, alpha, MTOR - mechanistic target of rapamycin (serine/threonine kinase), ABCA1 - atp-binding cassette, sub-family a (abc1), member 1, XRN1 - 5'-3' exoribonuclease 1, ANXA7 - annexin a7, EIF4A3 - eukaryotic translation initiation factor 4a3, AGL - amylo-alpha-1, 6-glucosidase, 4-alpha-glucanotra…
GO:0009725	response to hormone	3.33e-06	0.000757	2.39	5073	183	359	31	[DDX18 - dead (asp-glu-ala-asp) box polypeptide 18, PRKACA - protein kinase, camp-dependent, catalytic, alpha, MTOR - mechanistic target of rapamycin (serine/threonine kinase), MARS - methionyl-trna synthetase, XRN1 - 5'-3' exoribonuclease 1, SCAP - srebf chaperone, AGL - amylo-alpha-1, 6-glucosidase, 4-alpha-glucanotransferase, IQGAP1 - iq motif containing gtpase activating protein 1, C2CD5 - c2…
GO:1901564	organonitrogen compound metabolic process	3.39e-06	0.000755	1.32	5073	1802	359	168	[MEX3C - mex-3 rna binding family member c, MCCC1 - methylcrotonoyl-coa carboxylase 1 (alpha), SUCLA2 - succinate-coa ligase, adp-forming, beta subunit, ABCA1 - atp-binding cassette, sub-family a (abc1), member 1, GFM2 - g elongation factor, mitochondrial 2, CDC34 - cell division cycle 34, DYRK4 - dual-specificity tyrosine-(y)-phosphorylation regulated kinase 4, ABL1 - c-abl oncogene 1, non-recep…
GO:0031326	regulation of cellular biosynthetic process	3.56e-06	0.000778	1.47	5073	1069	359	111	[MAPRE3 - microtubule-associated protein, rp/eb family, member 3, ELOF1 - elongation factor 1 homolog (s. cerevisiae), XRN1 - 5'-3' exoribonuclease 1, SCAP - srebf chaperone, ABL1 - c-abl oncogene 1, non-receptor tyrosine kinase, UPF1 - upf1 regulator of nonsense transcripts homolog (yeast), PSMA2 - proteasome (prosome, macropain) subunit, alpha type, 2, GTF2B - general transcription factor iib, …
GO:0045944	positive regulation of transcription by RNA polymerase II	4.15e-06	0.00089	2.09	5073	270	359	40	[ACVR2A - activin a receptor, type iia, SUPT16H - suppressor of ty 16 homolog (s. cerevisiae), CDC73 - cell division cycle 73, TFDP1 - transcription factor dp-1, DAB2IP - dab2 interacting protein, SCAP - srebf chaperone, ABL1 - c-abl oncogene 1, non-receptor tyrosine kinase, FOXJ3 - forkhead box j3, TNKS - tankyrase, trf1-interacting ankyrin-related adp-ribose polymerase, RPS6KA3 - ribosomal prot…
GO:2000113	negative regulation of cellular macromolecule biosynthetic process	4.73e-06	0.000995	1.93	5073	352	359	48	[CNOT1 - ccr4-not transcription complex, subunit 1, NAT10 - n-acetyltransferase 10 (gcn5-related), CCNE1 - cyclin e1, XPO1 - exportin 1 (crm1 homolog, yeast), YTHDF2 - yth domain family, member 2, CTR9 - ctr9, paf1/rna polymerase ii complex component, KDM2B - lysine (k)-specific demethylase 2b, CDC73 - cell division cycle 73, XRN1 - 5'-3' exoribonuclease 1, DAB2IP - dab2 interacting protein, EIF4…
GO:0009892	negative regulation of metabolic process	4.79e-06	0.000987	1.54	5073	833	359	91	[XDH - xanthine dehydrogenase, GTPBP2 - gtp binding protein 2, MTOR - mechanistic target of rapamycin (serine/threonine kinase), XPO1 - exportin 1 (crm1 homolog, yeast), KDM2B - lysine (k)-specific demethylase 2b, RPL11 - ribosomal protein l11, ANXA7 - annexin a7, VPS35 - vacuolar protein sorting 35 homolog (s. cerevisiae), XRN1 - 5'-3' exoribonuclease 1, SCAP - srebf chaperone, ABL1 - c-abl onco…
GO:0010604	positive regulation of macromolecule metabolic process	4.86e-06	0.000985	1.51	5073	905	359	97	[MAPRE3 - microtubule-associated protein, rp/eb family, member 3, ELOF1 - elongation factor 1 homolog (s. cerevisiae), SCAP - srebf chaperone, ABL1 - c-abl oncogene 1, non-receptor tyrosine kinase, HTRA2 - htra serine peptidase 2, IQGAP1 - iq motif containing gtpase activating protein 1, RDX - radixin, UPF1 - upf1 regulator of nonsense transcripts homolog (yeast), GTF2B - general transcription fa…
GO:0010605	negative regulation of macromolecule metabolic process	5.18e-06	0.00103	1.58	5073	752	359	84	[XDH - xanthine dehydrogenase, GTPBP2 - gtp binding protein 2, MTOR - mechanistic target of rapamycin (serine/threonine kinase), XPO1 - exportin 1 (crm1 homolog, yeast), KDM2B - lysine (k)-specific demethylase 2b, RPL11 - ribosomal protein l11, XRN1 - 5'-3' exoribonuclease 1, ANXA7 - annexin a7, VPS35 - vacuolar protein sorting 35 homolog (s. cerevisiae), ABL1 - c-abl oncogene 1, non-receptor tyr…
GO:0045893	positive regulation of transcription, DNA-templated	5.84e-06	0.00114	1.9	5073	365	359	49	[MAPRE3 - microtubule-associated protein, rp/eb family, member 3, MTOR - mechanistic target of rapamycin (serine/threonine kinase), ELOF1 - elongation factor 1 homolog (s. cerevisiae), MARS - methionyl-trna synthetase, SCAP - srebf chaperone, ABL1 - c-abl oncogene 1, non-receptor tyrosine kinase, FOXJ3 - forkhead box j3, TNKS - tankyrase, trf1-interacting ankyrin-related adp-ribose polymerase, GT…
GO:0031325	positive regulation of cellular metabolic process	5.93e-06	0.00114	1.51	5073	909	359	97	[MAPRE3 - microtubule-associated protein, rp/eb family, member 3, ELOF1 - elongation factor 1 homolog (s. cerevisiae), SCAP - srebf chaperone, ABL1 - c-abl oncogene 1, non-receptor tyrosine kinase, HTRA2 - htra serine peptidase 2, IQGAP1 - iq motif containing gtpase activating protein 1, RDX - radixin, UPF1 - upf1 regulator of nonsense transcripts homolog (yeast), GTF2B - general transcription fa…
GO:0009893	positive regulation of metabolic process	5.96e-06	0.00112	1.48	5073	994	359	104	[MAPRE3 - microtubule-associated protein, rp/eb family, member 3, ELOF1 - elongation factor 1 homolog (s. cerevisiae), SCAP - srebf chaperone, ABL1 - c-abl oncogene 1, non-receptor tyrosine kinase, IQGAP1 - iq motif containing gtpase activating protein 1, HTRA2 - htra serine peptidase 2, RDX - radixin, UPF1 - upf1 regulator of nonsense transcripts homolog (yeast), GCH1 - gtp cyclohydrolase 1, GTF…
GO:1901699	cellular response to nitrogen compound	6.54e-06	0.00122	2.67	5073	127	359	24	[CDK5 - cyclin-dependent kinase 5, MTR - 5-methyltetrahydrofolate-homocysteine methyltransferase, SNX6 - sorting nexin 6, PRKACA - protein kinase, camp-dependent, catalytic, alpha, PCK1 - phosphoenolpyruvate carboxykinase 1 (soluble), DNMT3A - dna (cytosine-5-)-methyltransferase 3 alpha, MTOR - mechanistic target of rapamycin (serine/threonine kinase), RAD51 - rad51 recombinase, MARS - methionyl-…
GO:1902679	negative regulation of RNA biosynthetic process	8.65e-06	0.00158	2.01	5073	288	359	41	[CNOT1 - ccr4-not transcription complex, subunit 1, CCNE1 - cyclin e1, XPO1 - exportin 1 (crm1 homolog, yeast), CTR9 - ctr9, paf1/rna polymerase ii complex component, KDM2B - lysine (k)-specific demethylase 2b, CDC73 - cell division cycle 73, DAB2IP - dab2 interacting protein, RPS14 - ribosomal protein s14, GCLC - glutamate-cysteine ligase, catalytic subunit, CRYM - crystallin, mu, NOTCH1 - notch…
GO:1903507	negative regulation of nucleic acid-templated transcription	8.65e-06	0.00155	2.01	5073	288	359	41	[CNOT1 - ccr4-not transcription complex, subunit 1, CCNE1 - cyclin e1, XPO1 - exportin 1 (crm1 homolog, yeast), CTR9 - ctr9, paf1/rna polymerase ii complex component, KDM2B - lysine (k)-specific demethylase 2b, CDC73 - cell division cycle 73, DAB2IP - dab2 interacting protein, RPS14 - ribosomal protein s14, GCLC - glutamate-cysteine ligase, catalytic subunit, CRYM - crystallin, mu, NOTCH1 - notch…
GO:0007623	circadian rhythm	8.97e-06	0.00159	4.71	5073	33	359	11	[CSNK1E - casein kinase 1, epsilon, BTBD9 - btb (poz) domain containing 9, MYCBP2 - myc binding protein 2, e3 ubiquitin protein ligase, HDAC2 - histone deacetylase 2, OGT - o-linked n-acetylglucosamine (glcnac) transferase, DYRK1A - dual-specificity tyrosine-(y)-phosphorylation regulated kinase 1a, PRMT5 - protein arginine methyltransferase 5, IMPDH2 - imp (inosine 5'-monophosphate) dehydrogenase…
GO:0010556	regulation of macromolecule biosynthetic process	9.4e-06	0.00164	1.46	5073	1016	359	105	[MAPRE3 - microtubule-associated protein, rp/eb family, member 3, ELOF1 - elongation factor 1 homolog (s. cerevisiae), XRN1 - 5'-3' exoribonuclease 1, SCAP - srebf chaperone, ABL1 - c-abl oncogene 1, non-receptor tyrosine kinase, PSMA2 - proteasome (prosome, macropain) subunit, alpha type, 2, UPF1 - upf1 regulator of nonsense transcripts homolog (yeast), GTF2B - general transcription factor iib, …
GO:0071417	cellular response to organonitrogen compound	9.71e-06	0.00167	2.75	5073	113	359	22	[CDK5 - cyclin-dependent kinase 5, SNX6 - sorting nexin 6, PCK1 - phosphoenolpyruvate carboxykinase 1 (soluble), PRKACA - protein kinase, camp-dependent, catalytic, alpha, DNMT3A - dna (cytosine-5-)-methyltransferase 3 alpha, MTOR - mechanistic target of rapamycin (serine/threonine kinase), RAD51 - rad51 recombinase, MARS - methionyl-trna synthetase, XRN1 - 5'-3' exoribonuclease 1, ABL1 - c-abl o…
GO:0072347	response to anesthetic	9.92e-06	0.00167	7.61	5073	13	359	7	[EFTUD2 - elongation factor tu gtp binding domain containing 2, PRKCE - protein kinase c, epsilon, HDAC2 - histone deacetylase 2, PPP2R2A - protein phosphatase 2, regulatory subunit b, alpha, HSPA5 - heat shock 70kda protein 5 (glucose-regulated protein, 78kda), DNMT3A - dna (cytosine-5-)-methyltransferase 3 alpha, MTOR - mechanistic target of rapamycin (serine/threonine kinase)]
GO:0048518	positive regulation of biological process	1.12e-05	0.00186	1.33	5073	1607	359	151	[MAPRE3 - microtubule-associated protein, rp/eb family, member 3, ELOF1 - elongation factor 1 homolog (s. cerevisiae), ABCA1 - atp-binding cassette, sub-family a (abc1), member 1, CDC34 - cell division cycle 34, SCAP - srebf chaperone, ABL1 - c-abl oncogene 1, non-receptor tyrosine kinase, HTRA2 - htra serine peptidase 2, IQGAP1 - iq motif containing gtpase activating protein 1, C2CD5 - c2 calciu…
GO:0045935	positive regulation of nucleobase-containing compound metabolic process	1.18e-05	0.00193	1.7	5073	515	359	62	[MAPRE3 - microtubule-associated protein, rp/eb family, member 3, MTOR - mechanistic target of rapamycin (serine/threonine kinase), ELOF1 - elongation factor 1 homolog (s. cerevisiae), MARS - methionyl-trna synthetase, SCAP - srebf chaperone, ABL1 - c-abl oncogene 1, non-receptor tyrosine kinase, FOXJ3 - forkhead box j3, TNKS - tankyrase, trf1-interacting ankyrin-related adp-ribose polymerase, UP…
GO:0006725	cellular aromatic compound metabolic process	1.2e-05	0.00194	1.36	5073	1400	359	135	[REV3L - rev3-like, polymerase (dna directed), zeta, catalytic subunit, SUCLA2 - succinate-coa ligase, adp-forming, beta subunit, ELOF1 - elongation factor 1 homolog (s. cerevisiae), CDC34 - cell division cycle 34, XRN1 - 5'-3' exoribonuclease 1, ABL1 - c-abl oncogene 1, non-receptor tyrosine kinase, COX10 - cytochrome c oxidase assembly homolog 10 (yeast), RECQL - recq protein-like (dna helicase…
GO:0051171	regulation of nitrogen compound metabolic process	1.24e-05	0.00197	1.33	5073	1557	359	147	[MAPRE3 - microtubule-associated protein, rp/eb family, member 3, ELOF1 - elongation factor 1 homolog (s. cerevisiae), XRN1 - 5'-3' exoribonuclease 1, SCAP - srebf chaperone, ABL1 - c-abl oncogene 1, non-receptor tyrosine kinase, HTRA2 - htra serine peptidase 2, IQGAP1 - iq motif containing gtpase activating protein 1, RDX - radixin, PSMA2 - proteasome (prosome, macropain) subunit, alpha type, 2,…
GO:0032502	developmental process	1.3e-05	0.00204	1.4	5073	1223	359	121	[MEX3C - mex-3 rna binding family member c, SLC4A10 - solute carrier family 4, sodium bicarbonate transporter, member 10, SDHA - succinate dehydrogenase complex, subunit a, flavoprotein (fp), ANXA7 - annexin a7, SCAP - srebf chaperone, ABL1 - c-abl oncogene 1, non-receptor tyrosine kinase, IQGAP1 - iq motif containing gtpase activating protein 1, HTRA2 - htra serine peptidase 2, DYNC2H1 - dynein,…
GO:0032501	multicellular organismal process	1.33e-05	0.00205	1.57	5073	711	359	79	[MEX3C - mex-3 rna binding family member c, ATP2A1 - atpase, ca++ transporting, cardiac muscle, fast twitch 1, SLC4A10 - solute carrier family 4, sodium bicarbonate transporter, member 10, PRKACA - protein kinase, camp-dependent, catalytic, alpha, MTOR - mechanistic target of rapamycin (serine/threonine kinase), ABCA1 - atp-binding cassette, sub-family a (abc1), member 1, USH2A - usher syndrome 2…
GO:0070555	response to interleukin-1	1.36e-05	0.00207	6.28	5073	18	359	8	[DAB2IP - dab2 interacting protein, CACTIN - cactin, spliceosome c complex subunit, PRKCI - protein kinase c, iota, PCK1 - phosphoenolpyruvate carboxykinase 1 (soluble), GCLC - glutamate-cysteine ligase, catalytic subunit, UPF1 - upf1 regulator of nonsense transcripts homolog (yeast), ETS1 - v-ets avian erythroblastosis virus e26 oncogene homolog 1, YY1 - yy1 transcription factor]
GO:2000112	regulation of cellular macromolecule biosynthetic process	1.64e-05	0.00246	1.46	5073	979	359	101	[MAPRE3 - microtubule-associated protein, rp/eb family, member 3, ELOF1 - elongation factor 1 homolog (s. cerevisiae), XRN1 - 5'-3' exoribonuclease 1, SCAP - srebf chaperone, ABL1 - c-abl oncogene 1, non-receptor tyrosine kinase, PSMA2 - proteasome (prosome, macropain) subunit, alpha type, 2, UPF1 - upf1 regulator of nonsense transcripts homolog (yeast), GTF2B - general transcription factor iib, …
GO:1903508	positive regulation of nucleic acid-templated transcription	1.64e-05	0.00244	1.8	5073	400	359	51	[MAPRE3 - microtubule-associated protein, rp/eb family, member 3, MTOR - mechanistic target of rapamycin (serine/threonine kinase), ELOF1 - elongation factor 1 homolog (s. cerevisiae), MARS - methionyl-trna synthetase, SCAP - srebf chaperone, ABL1 - c-abl oncogene 1, non-receptor tyrosine kinase, FOXJ3 - forkhead box j3, TNKS - tankyrase, trf1-interacting ankyrin-related adp-ribose polymerase, GT…
GO:0045892	negative regulation of transcription, DNA-templated	1.74e-05	0.00256	2	5073	276	359	39	[CNOT1 - ccr4-not transcription complex, subunit 1, CCNE1 - cyclin e1, XPO1 - exportin 1 (crm1 homolog, yeast), CTR9 - ctr9, paf1/rna polymerase ii complex component, KDM2B - lysine (k)-specific demethylase 2b, CDC73 - cell division cycle 73, DAB2IP - dab2 interacting protein, RPS14 - ribosomal protein s14, GCLC - glutamate-cysteine ligase, catalytic subunit, CRYM - crystallin, mu, NOTCH1 - notch…
GO:1902680	positive regulation of RNA biosynthetic process	1.76e-05	0.00255	1.8	5073	401	359	51	[MAPRE3 - microtubule-associated protein, rp/eb family, member 3, MTOR - mechanistic target of rapamycin (serine/threonine kinase), ELOF1 - elongation factor 1 homolog (s. cerevisiae), MARS - methionyl-trna synthetase, SCAP - srebf chaperone, ABL1 - c-abl oncogene 1, non-receptor tyrosine kinase, FOXJ3 - forkhead box j3, TNKS - tankyrase, trf1-interacting ankyrin-related adp-ribose polymerase, GT…
GO:0002237	response to molecule of bacterial origin	1.8e-05	0.00257	3.42	5073	62	359	15	[PCK1 - phosphoenolpyruvate carboxykinase 1 (soluble), ABCA1 - atp-binding cassette, sub-family a (abc1), member 1, CTR9 - ctr9, paf1/rna polymerase ii complex component, CDC73 - cell division cycle 73, DAB2IP - dab2 interacting protein, DMBT1 - deleted in malignant brain tumors 1, ABL1 - c-abl oncogene 1, non-receptor tyrosine kinase, CACTIN - cactin, spliceosome c complex subunit, HDAC2 - histo…
GO:0080090	regulation of primary metabolic process	1.83e-05	0.00258	1.32	5073	1620	359	151	[MAPRE3 - microtubule-associated protein, rp/eb family, member 3, ELOF1 - elongation factor 1 homolog (s. cerevisiae), ABCA1 - atp-binding cassette, sub-family a (abc1), member 1, XRN1 - 5'-3' exoribonuclease 1, SCAP - srebf chaperone, ABL1 - c-abl oncogene 1, non-receptor tyrosine kinase, HTRA2 - htra serine peptidase 2, IQGAP1 - iq motif containing gtpase activating protein 1, RDX - radixin, PS…
GO:0018193	peptidyl-amino acid modification	1.9e-05	0.00264	1.86	5073	349	359	46	[TEC - tec protein tyrosine kinase, PRKACA - protein kinase, camp-dependent, catalytic, alpha, MTOR - mechanistic target of rapamycin (serine/threonine kinase), CTR9 - ctr9, paf1/rna polymerase ii complex component, FBXO11 - f-box protein 11, DYRK4 - dual-specificity tyrosine-(y)-phosphorylation regulated kinase 4, PPWD1 - peptidylprolyl isomerase domain and wd repeat containing 1, MARK3 - map/mi…
GO:0046483	heterocycle metabolic process	1.92e-05	0.00264	1.36	5073	1386	359	133	[MCCC1 - methylcrotonoyl-coa carboxylase 1 (alpha), REV3L - rev3-like, polymerase (dna directed), zeta, catalytic subunit, SUCLA2 - succinate-coa ligase, adp-forming, beta subunit, ELOF1 - elongation factor 1 homolog (s. cerevisiae), CDC34 - cell division cycle 34, XRN1 - 5'-3' exoribonuclease 1, ABL1 - c-abl oncogene 1, non-receptor tyrosine kinase, COX10 - cytochrome c oxidase assembly homolog …
GO:0071407	cellular response to organic cyclic compound	1.94e-05	0.00264	2.89	5073	93	359	19	[DDX18 - dead (asp-glu-ala-asp) box polypeptide 18, PRKACA - protein kinase, camp-dependent, catalytic, alpha, PCK1 - phosphoenolpyruvate carboxykinase 1 (soluble), RAE1 - rae1 rna export 1 homolog (s. pombe), ABCA1 - atp-binding cassette, sub-family a (abc1), member 1, XRN1 - 5'-3' exoribonuclease 1, RAD51 - rad51 recombinase, ABL1 - c-abl oncogene 1, non-receptor tyrosine kinase, HDAC2 - histon…
GO:0006950	response to stress	1.98e-05	0.00265	1.47	5073	922	359	96	[ATP2A1 - atpase, ca++ transporting, cardiac muscle, fast twitch 1, MTR - 5-methyltetrahydrofolate-homocysteine methyltransferase, PRKACA - protein kinase, camp-dependent, catalytic, alpha, REV3L - rev3-like, polymerase (dna directed), zeta, catalytic subunit, MTOR - mechanistic target of rapamycin (serine/threonine kinase), ABCA1 - atp-binding cassette, sub-family a (abc1), member 1, MARS - meth…
GO:0006101	citrate metabolic process	2.03e-05	0.00269	5.3	5073	24	359	9	[NNT - nicotinamide nucleotide transhydrogenase, DLD - dihydrolipoamide dehydrogenase, ACLY - atp citrate lyase, ACO1 - aconitase 1, soluble, SUCLA2 - succinate-coa ligase, adp-forming, beta subunit, FH - fumarate hydratase, SUCLG1 - succinate-coa ligase, alpha subunit, SDHA - succinate dehydrogenase complex, subunit a, flavoprotein (fp), CS - citrate synthase]
GO:0009894	regulation of catabolic process	2.36e-05	0.00309	1.77	5073	416	359	52	[PRKACA - protein kinase, camp-dependent, catalytic, alpha, MTOR - mechanistic target of rapamycin (serine/threonine kinase), XPO1 - exportin 1 (crm1 homolog, yeast), ABCB11 - atp-binding cassette, sub-family b (mdr/tap), member 11, RPL11 - ribosomal protein l11, VPS35 - vacuolar protein sorting 35 homolog (s. cerevisiae), XRN1 - 5'-3' exoribonuclease 1, ABL1 - c-abl oncogene 1, non-receptor tyro…
GO:0048583	regulation of response to stimulus	2.59e-05	0.00336	1.42	5073	1076	359	108	[RGS19 - regulator of g-protein signaling 19, ABCA1 - atp-binding cassette, sub-family a (abc1), member 1, CDC34 - cell division cycle 34, ABL1 - c-abl oncogene 1, non-receptor tyrosine kinase, HTRA2 - htra serine peptidase 2, IQGAP1 - iq motif containing gtpase activating protein 1, DYNC2H1 - dynein, cytoplasmic 2, heavy chain 1, RDX - radixin, PDE11A - phosphodiesterase 11a, GCH1 - gtp cyclohyd…
GO:0010468	regulation of gene expression	3e-05	0.00384	1.39	5073	1180	359	116	[MAPRE3 - microtubule-associated protein, rp/eb family, member 3, ELOF1 - elongation factor 1 homolog (s. cerevisiae), ANXA7 - annexin a7, XRN1 - 5'-3' exoribonuclease 1, SCAP - srebf chaperone, ABL1 - c-abl oncogene 1, non-receptor tyrosine kinase, RDX - radixin, UPF1 - upf1 regulator of nonsense transcripts homolog (yeast), PSMA2 - proteasome (prosome, macropain) subunit, alpha type, 2, GTF2B -…
GO:0009410	response to xenobiotic stimulus	3.06e-05	0.00387	4.2	5073	37	359	11	[EFTUD2 - elongation factor tu gtp binding domain containing 2, CAD - carbamoyl-phosphate synthetase 2, aspartate transcarbamylase, and dihydroorotase, PRKCE - protein kinase c, epsilon, HDAC2 - histone deacetylase 2, PCK1 - phosphoenolpyruvate carboxykinase 1 (soluble), PPP3CA - protein phosphatase 3, catalytic subunit, alpha isozyme, PPP2R2A - protein phosphatase 2, regulatory subunit b, alpha,…
GO:0051246	regulation of protein metabolic process	3.14e-05	0.00393	1.49	5073	835	359	88	[XDH - xanthine dehydrogenase, MAPRE3 - microtubule-associated protein, rp/eb family, member 3, GTPBP2 - gtp binding protein 2, PRKACA - protein kinase, camp-dependent, catalytic, alpha, MTOR - mechanistic target of rapamycin (serine/threonine kinase), XPO1 - exportin 1 (crm1 homolog, yeast), RPL11 - ribosomal protein l11, VPS35 - vacuolar protein sorting 35 homolog (s. cerevisiae), XRN1 - 5'-3' …
GO:0060255	regulation of macromolecule metabolic process	3.18e-05	0.00394	1.3	5073	1675	359	154	[MAPRE3 - microtubule-associated protein, rp/eb family, member 3, ELOF1 - elongation factor 1 homolog (s. cerevisiae), XRN1 - 5'-3' exoribonuclease 1, ANXA7 - annexin a7, SCAP - srebf chaperone, ABL1 - c-abl oncogene 1, non-receptor tyrosine kinase, HTRA2 - htra serine peptidase 2, IQGAP1 - iq motif containing gtpase activating protein 1, RDX - radixin, PSMA2 - proteasome (prosome, macropain) sub…
GO:0032922	circadian regulation of gene expression	3.28e-05	0.00402	6.59	5073	15	359	7	[CSNK1E - casein kinase 1, epsilon, MYCBP2 - myc binding protein 2, e3 ubiquitin protein ligase, HDAC2 - histone deacetylase 2, OGT - o-linked n-acetylglucosamine (glcnac) transferase, PRMT5 - protein arginine methyltransferase 5, PPP1CC - protein phosphatase 1, catalytic subunit, gamma isozyme, KDM5A - lysine (k)-specific demethylase 5a]
GO:0031323	regulation of cellular metabolic process	3.37e-05	0.00409	1.3	5073	1690	359	155	[MAPRE3 - microtubule-associated protein, rp/eb family, member 3, ELOF1 - elongation factor 1 homolog (s. cerevisiae), XRN1 - 5'-3' exoribonuclease 1, SCAP - srebf chaperone, ABL1 - c-abl oncogene 1, non-receptor tyrosine kinase, HTRA2 - htra serine peptidase 2, IQGAP1 - iq motif containing gtpase activating protein 1, RDX - radixin, GCH1 - gtp cyclohydrolase 1, PSMA2 - proteasome (prosome, macro…
GO:0000122	negative regulation of transcription by RNA polymerase II	3.42e-05	0.0041	2.17	5073	195	359	30	[CNOT1 - ccr4-not transcription complex, subunit 1, CCNE1 - cyclin e1, XPO1 - exportin 1 (crm1 homolog, yeast), KDM2B - lysine (k)-specific demethylase 2b, CTR9 - ctr9, paf1/rna polymerase ii complex component, CDC73 - cell division cycle 73, DAB2IP - dab2 interacting protein, RPS14 - ribosomal protein s14, CRYM - crystallin, mu, NOTCH1 - notch 1, WT1 - wilms tumor 1, USP9X - ubiquitin specific p…
GO:0032496	response to lipopolysaccharide	3.53e-05	0.00418	3.41	5073	58	359	14	[PCK1 - phosphoenolpyruvate carboxykinase 1 (soluble), ABCA1 - atp-binding cassette, sub-family a (abc1), member 1, CTR9 - ctr9, paf1/rna polymerase ii complex component, CDC73 - cell division cycle 73, DAB2IP - dab2 interacting protein, ABL1 - c-abl oncogene 1, non-receptor tyrosine kinase, CACTIN - cactin, spliceosome c complex subunit, HDAC2 - histone deacetylase 2, PDE4D - phosphodiesterase 4…
GO:0048870	cell motility	3.56e-05	0.00418	2.14	5073	205	359	31	[USH2A - usher syndrome 2a (autosomal recessive, mild), DAB2IP - dab2 interacting protein, TOP2B - topoisomerase (dna) ii beta 180kda, ABL1 - c-abl oncogene 1, non-receptor tyrosine kinase, IQGAP1 - iq motif containing gtpase activating protein 1, DNAH3 - dynein, axonemal, heavy chain 3, FBXO45 - f-box protein 45, DNAH7 - dynein, axonemal, heavy chain 7, ETS1 - v-ets avian erythroblastosis virus …
GO:0019222	regulation of metabolic process	4.06e-05	0.00471	1.27	5073	1870	359	168	[MAPRE3 - microtubule-associated protein, rp/eb family, member 3, ELOF1 - elongation factor 1 homolog (s. cerevisiae), ABCA1 - atp-binding cassette, sub-family a (abc1), member 1, ANXA7 - annexin a7, XRN1 - 5'-3' exoribonuclease 1, SCAP - srebf chaperone, ABL1 - c-abl oncogene 1, non-receptor tyrosine kinase, HTRA2 - htra serine peptidase 2, IQGAP1 - iq motif containing gtpase activating protein …
GO:0033554	cellular response to stress	4.09e-05	0.00469	1.55	5073	674	359	74	[ATP2A1 - atpase, ca++ transporting, cardiac muscle, fast twitch 1, MTR - 5-methyltetrahydrofolate-homocysteine methyltransferase, PRKACA - protein kinase, camp-dependent, catalytic, alpha, REV3L - rev3-like, polymerase (dna directed), zeta, catalytic subunit, MTOR - mechanistic target of rapamycin (serine/threonine kinase), MARS - methionyl-trna synthetase, SCAP - srebf chaperone, TLN1 - talin 1…
GO:0010648	negative regulation of cell communication	4.24e-05	0.00482	1.81	5073	360	359	46	[XDH - xanthine dehydrogenase, RGS19 - regulator of g-protein signaling 19, CNOT1 - ccr4-not transcription complex, subunit 1, PRKACA - protein kinase, camp-dependent, catalytic, alpha, MTOR - mechanistic target of rapamycin (serine/threonine kinase), YTHDF2 - yth domain family, member 2, CDC34 - cell division cycle 34, DAB2IP - dab2 interacting protein, MARK3 - map/microtubule affinity-regulatin…
GO:0072350	tricarboxylic acid metabolic process	4.27e-05	0.00481	4.89	5073	26	359	9	[NNT - nicotinamide nucleotide transhydrogenase, DLD - dihydrolipoamide dehydrogenase, ACLY - atp citrate lyase, ACO1 - aconitase 1, soluble, SUCLA2 - succinate-coa ligase, adp-forming, beta subunit, FH - fumarate hydratase, SUCLG1 - succinate-coa ligase, alpha subunit, SDHA - succinate dehydrogenase complex, subunit a, flavoprotein (fp), CS - citrate synthase]
GO:0035690	cellular response to drug	4.35e-05	0.00485	2.83	5073	90	359	18	[CAD - carbamoyl-phosphate synthetase 2, aspartate transcarbamylase, and dihydroorotase, MTR - 5-methyltetrahydrofolate-homocysteine methyltransferase, PCK1 - phosphoenolpyruvate carboxykinase 1 (soluble), PPP3CA - protein phosphatase 3, catalytic subunit, alpha isozyme, DNMT3A - dna (cytosine-5-)-methyltransferase 3 alpha, XRN1 - 5'-3' exoribonuclease 1, RAD51 - rad51 recombinase, EFTUD2 - elong…
GO:0048523	negative regulation of cellular process	4.44e-05	0.0049	1.36	5073	1279	359	123	[RGS19 - regulator of g-protein signaling 19, ABCA1 - atp-binding cassette, sub-family a (abc1), member 1, CDC34 - cell division cycle 34, XRN1 - 5'-3' exoribonuclease 1, ABL1 - c-abl oncogene 1, non-receptor tyrosine kinase, IQGAP1 - iq motif containing gtpase activating protein 1, HTRA2 - htra serine peptidase 2, PDE11A - phosphodiesterase 11a, RDX - radixin, UPF1 - upf1 regulator of nonsense t…
GO:0051239	regulation of multicellular organismal process	4.53e-05	0.00494	1.55	5073	676	359	74	[XDH - xanthine dehydrogenase, ATP2A1 - atpase, ca++ transporting, cardiac muscle, fast twitch 1, PRKACA - protein kinase, camp-dependent, catalytic, alpha, MTOR - mechanistic target of rapamycin (serine/threonine kinase), ABCA1 - atp-binding cassette, sub-family a (abc1), member 1, KDM2B - lysine (k)-specific demethylase 2b, VPS35 - vacuolar protein sorting 35 homolog (s. cerevisiae), ABL1 - c-a…
GO:0023057	negative regulation of signaling	4.55e-05	0.00492	1.8	5073	361	359	46	[XDH - xanthine dehydrogenase, RGS19 - regulator of g-protein signaling 19, CNOT1 - ccr4-not transcription complex, subunit 1, PRKACA - protein kinase, camp-dependent, catalytic, alpha, MTOR - mechanistic target of rapamycin (serine/threonine kinase), YTHDF2 - yth domain family, member 2, CDC34 - cell division cycle 34, DAB2IP - dab2 interacting protein, MARK3 - map/microtubule affinity-regulatin…
GO:0019219	regulation of nucleobase-containing compound metabolic process	4.65e-05	0.00498	1.41	5073	1040	359	104	[MAPRE3 - microtubule-associated protein, rp/eb family, member 3, ELOF1 - elongation factor 1 homolog (s. cerevisiae), XRN1 - 5'-3' exoribonuclease 1, SCAP - srebf chaperone, ABL1 - c-abl oncogene 1, non-receptor tyrosine kinase, PSMA2 - proteasome (prosome, macropain) subunit, alpha type, 2, UPF1 - upf1 regulator of nonsense transcripts homolog (yeast), GTF2B - general transcription factor iib, …
GO:0019538	protein metabolic process	4.93e-05	0.00523	1.34	5073	1359	359	129	[MEX3C - mex-3 rna binding family member c, ABCA1 - atp-binding cassette, sub-family a (abc1), member 1, CDC34 - cell division cycle 34, GFM2 - g elongation factor, mitochondrial 2, DYRK4 - dual-specificity tyrosine-(y)-phosphorylation regulated kinase 4, ABL1 - c-abl oncogene 1, non-receptor tyrosine kinase, HTRA2 - htra serine peptidase 2, DYNC2H1 - dynein, cytoplasmic 2, heavy chain 1, FBXO45 …
GO:0032870	cellular response to hormone stimulus	5.08e-05	0.00534	2.8	5073	91	359	18	[DDX18 - dead (asp-glu-ala-asp) box polypeptide 18, PRKACA - protein kinase, camp-dependent, catalytic, alpha, PCK1 - phosphoenolpyruvate carboxykinase 1 (soluble), MARS - methionyl-trna synthetase, PLOD3 - procollagen-lysine, 2-oxoglutarate 5-dioxygenase 3, EPRS - glutamyl-prolyl-trna synthetase, PRKCI - protein kinase c, iota, PRKCE - protein kinase c, epsilon, HMGCS1 - 3-hydroxy-3-methylglutar…
GO:0009605	response to external stimulus	5.19e-05	0.0054	1.84	5073	331	359	43	[ABCE1 - atp-binding cassette, sub-family e (oabp), member 1, MTOR - mechanistic target of rapamycin (serine/threonine kinase), ABCA1 - atp-binding cassette, sub-family a (abc1), member 1, CTR9 - ctr9, paf1/rna polymerase ii complex component, CDC73 - cell division cycle 73, MARS - methionyl-trna synthetase, DAB2IP - dab2 interacting protein, AGL - amylo-alpha-1, 6-glucosidase, 4-alpha-glucanotra…
GO:0010629	negative regulation of gene expression	5.3e-05	0.00547	1.66	5073	495	359	58	[XDH - xanthine dehydrogenase, GTPBP2 - gtp binding protein 2, XPO1 - exportin 1 (crm1 homolog, yeast), KDM2B - lysine (k)-specific demethylase 2b, RPL11 - ribosomal protein l11, ANXA7 - annexin a7, VPS35 - vacuolar protein sorting 35 homolog (s. cerevisiae), XRN1 - 5'-3' exoribonuclease 1, UPF1 - upf1 regulator of nonsense transcripts homolog (yeast), NOTCH1 - notch 1, WT1 - wilms tumor 1, TBL1X…
GO:0044267	cellular protein metabolic process	5.46e-05	0.00558	1.37	5073	1195	359	116	[MEX3C - mex-3 rna binding family member c, ABCA1 - atp-binding cassette, sub-family a (abc1), member 1, CDC34 - cell division cycle 34, GFM2 - g elongation factor, mitochondrial 2, DYRK4 - dual-specificity tyrosine-(y)-phosphorylation regulated kinase 4, ABL1 - c-abl oncogene 1, non-receptor tyrosine kinase, HTRA2 - htra serine peptidase 2, FBXO45 - f-box protein 45, PSMA2 - proteasome (prosome,…
GO:0001649	osteoblast differentiation	5.89e-05	0.00597	4.28	5073	33	359	10	[MSX2 - msh homeobox 2, PSMC2 - proteasome (prosome, macropain) 26s subunit, atpase, 2, FIGNL1 - fidgetin-like 1, CLTC - clathrin, heavy chain (hc), IARS - isoleucyl-trna synthetase, GTPBP4 - gtp binding protein 4, ATP5B - atp synthase, h+ transporting, mitochondrial f1 complex, beta polypeptide, SND1 - staphylococcal nuclease and tudor domain containing 1, DNAJC13 - dnaj (hsp40) homolog, subfami…
GO:0006520	cellular amino acid metabolic process	6.19e-05	0.00622	2.25	5073	163	359	26	[DLD - dihydrolipoamide dehydrogenase, MTR - 5-methyltetrahydrofolate-homocysteine methyltransferase, MCCC1 - methylcrotonoyl-coa carboxylase 1 (alpha), ALDH8A1 - aldehyde dehydrogenase 8 family, member a1, GLS - glutaminase, IARS - isoleucyl-trna synthetase, MARS - methionyl-trna synthetase, MTHFD1 - methylenetetrahydrofolate dehydrogenase (nadp+ dependent) 1, methenyltetrahydrofolate cyclohydro…
GO:0048522	positive regulation of cellular process	6.39e-05	0.00635	1.32	5073	1444	359	135	[MAPRE3 - microtubule-associated protein, rp/eb family, member 3, ABCA1 - atp-binding cassette, sub-family a (abc1), member 1, ELOF1 - elongation factor 1 homolog (s. cerevisiae), CDC34 - cell division cycle 34, SCAP - srebf chaperone, ABL1 - c-abl oncogene 1, non-receptor tyrosine kinase, IQGAP1 - iq motif containing gtpase activating protein 1, HTRA2 - htra serine peptidase 2, C2CD5 - c2 calciu…
GO:0040007	growth	6.86e-05	0.00677	2.74	5073	93	359	18	[MEX3C - mex-3 rna binding family member c, CDK5 - cyclin-dependent kinase 5, SLC4A10 - solute carrier family 4, sodium bicarbonate transporter, member 10, USP9X - ubiquitin specific peptidase 9, x-linked, TBL1XR1 - transducin (beta)-like 1 x-linked receptor 1, TEC - tec protein tyrosine kinase, PPP3CA - protein phosphatase 3, catalytic subunit, alpha isozyme, MTOR - mechanistic target of rapamyc…
GO:0048589	developmental growth	6.86e-05	0.00671	2.74	5073	93	359	18	[MEX3C - mex-3 rna binding family member c, CDK5 - cyclin-dependent kinase 5, SLC4A10 - solute carrier family 4, sodium bicarbonate transporter, member 10, USP9X - ubiquitin specific peptidase 9, x-linked, TBL1XR1 - transducin (beta)-like 1 x-linked receptor 1, TEC - tec protein tyrosine kinase, PPP3CA - protein phosphatase 3, catalytic subunit, alpha isozyme, MTOR - mechanistic target of rapamyc…
GO:0000377	RNA splicing, via transesterification reactions with bulged adenosine as nucleophile	7.12e-05	0.0069	2.28	5073	155	359	25	[SNRPD1 - small nuclear ribonucleoprotein d1 polypeptide 16kda, SF3B14 - splicing factor 3b, 14 kda subunit, PABPC1 - poly(a) binding protein, cytoplasmic 1, SKIV2L2 - superkiller viralicidic activity 2-like 2 (s. cerevisiae), PPWD1 - peptidylprolyl isomerase domain and wd repeat containing 1, EIF4A3 - eukaryotic translation initiation factor 4a3, PRPF4B - prp4 pre-mrna processing factor 4 homolo…
GO:0000398	mRNA splicing, via spliceosome	7.12e-05	0.00684	2.28	5073	155	359	25	[SNRPD1 - small nuclear ribonucleoprotein d1 polypeptide 16kda, SF3B14 - splicing factor 3b, 14 kda subunit, PABPC1 - poly(a) binding protein, cytoplasmic 1, SKIV2L2 - superkiller viralicidic activity 2-like 2 (s. cerevisiae), PPWD1 - peptidylprolyl isomerase domain and wd repeat containing 1, EIF4A3 - eukaryotic translation initiation factor 4a3, PRPF4B - prp4 pre-mrna processing factor 4 homolo…
GO:0042220	response to cocaine	8.09e-05	0.00771	8.83	5073	8	359	5	[EFTUD2 - elongation factor tu gtp binding domain containing 2, HDAC2 - histone deacetylase 2, DNMT3A - dna (cytosine-5-)-methyltransferase 3 alpha, HSPA5 - heat shock 70kda protein 5 (glucose-regulated protein, 78kda), MTOR - mechanistic target of rapamycin (serine/threonine kinase)]
GO:0071222	cellular response to lipopolysaccharide	8.31e-05	0.00785	4.54	5073	28	359	9	[DAB2IP - dab2 interacting protein, CACTIN - cactin, spliceosome c complex subunit, ABL1 - c-abl oncogene 1, non-receptor tyrosine kinase, PDE4D - phosphodiesterase 4d, camp-specific, UPF1 - upf1 regulator of nonsense transcripts homolog (yeast), PRPF8 - pre-mrna processing factor 8, ABCA1 - atp-binding cassette, sub-family a (abc1), member 1, CTR9 - ctr9, paf1/rna polymerase ii complex component…
GO:0040011	locomotion	8.33e-05	0.0078	2.02	5073	224	359	32	[USH2A - usher syndrome 2a (autosomal recessive, mild), DAB2IP - dab2 interacting protein, TOP2B - topoisomerase (dna) ii beta 180kda, ABL1 - c-abl oncogene 1, non-receptor tyrosine kinase, IQGAP1 - iq motif containing gtpase activating protein 1, DNAH3 - dynein, axonemal, heavy chain 3, FBXO45 - f-box protein 45, DNAH7 - dynein, axonemal, heavy chain 7, ETS1 - v-ets avian erythroblastosis virus …
GO:0000375	RNA splicing, via transesterification reactions	8.84e-05	0.00821	2.25	5073	157	359	25	[SNRPD1 - small nuclear ribonucleoprotein d1 polypeptide 16kda, SF3B14 - splicing factor 3b, 14 kda subunit, PABPC1 - poly(a) binding protein, cytoplasmic 1, SKIV2L2 - superkiller viralicidic activity 2-like 2 (s. cerevisiae), PPWD1 - peptidylprolyl isomerase domain and wd repeat containing 1, EIF4A3 - eukaryotic translation initiation factor 4a3, PRPF4B - prp4 pre-mrna processing factor 4 homolo…
GO:0023051	regulation of signaling	9.32e-05	0.00858	1.43	5073	908	359	92	[XDH - xanthine dehydrogenase, RGS19 - regulator of g-protein signaling 19, ATP2A1 - atpase, ca++ transporting, cardiac muscle, fast twitch 1, SLC4A10 - solute carrier family 4, sodium bicarbonate transporter, member 10, PRKACA - protein kinase, camp-dependent, catalytic, alpha, MTOR - mechanistic target of rapamycin (serine/threonine kinase), CDK14 - cyclin-dependent kinase 14, ABCA1 - atp-bindi…
GO:0048519	negative regulation of biological process	9.81e-05	0.00896	1.31	5073	1443	359	134	[RGS19 - regulator of g-protein signaling 19, ABCA1 - atp-binding cassette, sub-family a (abc1), member 1, CDC34 - cell division cycle 34, ANXA7 - annexin a7, XRN1 - 5'-3' exoribonuclease 1, SCAP - srebf chaperone, ABL1 - c-abl oncogene 1, non-receptor tyrosine kinase, IQGAP1 - iq motif containing gtpase activating protein 1, HTRA2 - htra serine peptidase 2, PDE11A - phosphodiesterase 11a, RDX - …
GO:0009968	negative regulation of signal transduction	9.82e-05	0.0089	1.79	5073	340	359	43	[XDH - xanthine dehydrogenase, RGS19 - regulator of g-protein signaling 19, CNOT1 - ccr4-not transcription complex, subunit 1, PRKACA - protein kinase, camp-dependent, catalytic, alpha, MTOR - mechanistic target of rapamycin (serine/threonine kinase), YTHDF2 - yth domain family, member 2, CDC34 - cell division cycle 34, DAB2IP - dab2 interacting protein, MARK3 - map/microtubule affinity-regulatin…
GO:0018210	peptidyl-threonine modification	0.000103	0.00924	4.04	5073	35	359	10	[CAD - carbamoyl-phosphate synthetase 2, aspartate transcarbamylase, and dihydroorotase, CDK5 - cyclin-dependent kinase 5, VRK1 - vaccinia related kinase 1, OXSR1 - oxidative stress responsive 1, PRKACA - protein kinase, camp-dependent, catalytic, alpha, TNKS - tankyrase, trf1-interacting ankyrin-related adp-ribose polymerase, DYRK1A - dual-specificity tyrosine-(y)-phosphorylation regulated kinas…
GO:0071236	cellular response to antibiotic	0.000103	0.00917	4.04	5073	35	359	10	[XRN1 - 5'-3' exoribonuclease 1, ABL1 - c-abl oncogene 1, non-receptor tyrosine kinase, PRKCE - protein kinase c, epsilon, HDAC2 - histone deacetylase 2, EZH2 - enhancer of zeste homolog 2 (drosophila), JAGN1 - jagunal homolog 1 (drosophila), HSPA5 - heat shock 70kda protein 5 (glucose-regulated protein, 78kda), DNMT3A - dna (cytosine-5-)-methyltransferase 3 alpha, ETS1 - v-ets avian erythroblast…
GO:0050793	regulation of developmental process	0.000109	0.0096	1.56	5073	588	359	65	[XDH - xanthine dehydrogenase, MEX3C - mex-3 rna binding family member c, PRKACA - protein kinase, camp-dependent, catalytic, alpha, MTOR - mechanistic target of rapamycin (serine/threonine kinase), ABCA1 - atp-binding cassette, sub-family a (abc1), member 1, KDM2B - lysine (k)-specific demethylase 2b, USH2A - usher syndrome 2a (autosomal recessive, mild), ANXA7 - annexin a7, VPS35 - vacuolar pro…
GO:0006099	tricarboxylic acid cycle	0.000111	0.00974	4.92	5073	23	359	8	[NNT - nicotinamide nucleotide transhydrogenase, DLD - dihydrolipoamide dehydrogenase, ACO1 - aconitase 1, soluble, SUCLA2 - succinate-coa ligase, adp-forming, beta subunit, FH - fumarate hydratase, SDHA - succinate dehydrogenase complex, subunit a, flavoprotein (fp), SUCLG1 - succinate-coa ligase, alpha subunit, CS - citrate synthase]
GO:0048754	branching morphogenesis of an epithelial tube	0.000111	0.00966	4.92	5073	23	359	8	[BTRC - beta-transducin repeat containing e3 ubiquitin protein ligase, MSX2 - msh homeobox 2, SMAD4 - smad family member 4, NOTCH1 - notch 1, SRF - serum response factor (c-fos serum response element-binding transcription factor), STK4 - serine/threonine kinase 4, WT1 - wilms tumor 1, PHB2 - prohibitin 2]
GO:0060359	response to ammonium ion	0.000111	0.00959	4.92	5073	23	359	8	[EFTUD2 - elongation factor tu gtp binding domain containing 2, ABL1 - c-abl oncogene 1, non-receptor tyrosine kinase, PRKCE - protein kinase c, epsilon, HDAC2 - histone deacetylase 2, PPP2R2A - protein phosphatase 2, regulatory subunit b, alpha, HSPA5 - heat shock 70kda protein 5 (glucose-regulated protein, 78kda), DNMT3A - dna (cytosine-5-)-methyltransferase 3 alpha, MTOR - mechanistic target o…
GO:0002376	immune system process	0.000122	0.0104	1.6	5073	521	359	59	[PRKACA - protein kinase, camp-dependent, catalytic, alpha, AP1G1 - adaptor-related protein complex 1, gamma 1 subunit, AGL - amylo-alpha-1, 6-glucosidase, 4-alpha-glucanotransferase, SCAP - srebf chaperone, ABL1 - c-abl oncogene 1, non-receptor tyrosine kinase, IQGAP1 - iq motif containing gtpase activating protein 1, IMPDH2 - imp (inosine 5'-monophosphate) dehydrogenase 2, PSMA2 - proteasome (p…
GO:0019752	carboxylic acid metabolic process	0.000122	0.0104	1.76	5073	354	359	44	[DLD - dihydrolipoamide dehydrogenase, MTR - 5-methyltetrahydrofolate-homocysteine methyltransferase, MCCC1 - methylcrotonoyl-coa carboxylase 1 (alpha), ALDH8A1 - aldehyde dehydrogenase 8 family, member a1, SUCLA2 - succinate-coa ligase, adp-forming, beta subunit, GLS - glutaminase, SDHA - succinate dehydrogenase complex, subunit a, flavoprotein (fp), SUCLG1 - succinate-coa ligase, alpha subunit,…
GO:0006464	cellular protein modification process	0.000128	0.0108	1.39	5073	1040	359	102	[MEX3C - mex-3 rna binding family member c, ABCA1 - atp-binding cassette, sub-family a (abc1), member 1, CDC34 - cell division cycle 34, DYRK4 - dual-specificity tyrosine-(y)-phosphorylation regulated kinase 4, ABL1 - c-abl oncogene 1, non-receptor tyrosine kinase, FBXO45 - f-box protein 45, PSMA2 - proteasome (prosome, macropain) subunit, alpha type, 2, GTF2B - general transcription factor iib, …
GO:0036211	protein modification process	0.000128	0.0107	1.39	5073	1040	359	102	[MEX3C - mex-3 rna binding family member c, ABCA1 - atp-binding cassette, sub-family a (abc1), member 1, CDC34 - cell division cycle 34, DYRK4 - dual-specificity tyrosine-(y)-phosphorylation regulated kinase 4, ABL1 - c-abl oncogene 1, non-receptor tyrosine kinase, FBXO45 - f-box protein 45, PSMA2 - proteasome (prosome, macropain) subunit, alpha type, 2, GTF2B - general transcription factor iib, …
GO:0051247	positive regulation of protein metabolic process	0.000134	0.0112	1.64	5073	466	359	54	[XDH - xanthine dehydrogenase, MAPRE3 - microtubule-associated protein, rp/eb family, member 3, PRKACA - protein kinase, camp-dependent, catalytic, alpha, MTOR - mechanistic target of rapamycin (serine/threonine kinase), VPS35 - vacuolar protein sorting 35 homolog (s. cerevisiae), SCAP - srebf chaperone, EIF3D - eukaryotic translation initiation factor 3, subunit d, ABL1 - c-abl oncogene 1, non-r…
GO:0009628	response to abiotic stimulus	0.000146	0.012	1.85	5073	282	359	37	[SLC4A10 - solute carrier family 4, sodium bicarbonate transporter, member 10, ERCC4 - excision repair cross-complementing rodent repair deficiency, complementation group 4, PRKACA - protein kinase, camp-dependent, catalytic, alpha, RAD54L - rad54-like (s. cerevisiae), UBE2A - ubiquitin-conjugating enzyme e2a, MTOR - mechanistic target of rapamycin (serine/threonine kinase), ANXA7 - annexin a7, S…
GO:0051098	regulation of binding	0.00015	0.0123	2.37	5073	125	359	21	[CDK5 - cyclin-dependent kinase 5, ERCC4 - excision repair cross-complementing rodent repair deficiency, complementation group 4, MAPRE3 - microtubule-associated protein, rp/eb family, member 3, PRKACA - protein kinase, camp-dependent, catalytic, alpha, PPP3CA - protein phosphatase 3, catalytic subunit, alpha isozyme, GTPBP4 - gtp binding protein 4, RPL11 - ribosomal protein l11, CSNK1E - casein …
GO:0006139	nucleobase-containing compound metabolic process	0.000151	0.0123	1.32	5073	1325	359	124	[REV3L - rev3-like, polymerase (dna directed), zeta, catalytic subunit, SUCLA2 - succinate-coa ligase, adp-forming, beta subunit, ELOF1 - elongation factor 1 homolog (s. cerevisiae), CDC34 - cell division cycle 34, XRN1 - 5'-3' exoribonuclease 1, ABL1 - c-abl oncogene 1, non-receptor tyrosine kinase, RECQL - recq protein-like (dna helicase q1-like), IMPDH2 - imp (inosine 5'-monophosphate) dehydro…
GO:0010646	regulation of cell communication	0.000152	0.0123	1.42	5073	895	359	90	[XDH - xanthine dehydrogenase, RGS19 - regulator of g-protein signaling 19, SLC4A10 - solute carrier family 4, sodium bicarbonate transporter, member 10, PRKACA - protein kinase, camp-dependent, catalytic, alpha, MTOR - mechanistic target of rapamycin (serine/threonine kinase), CDK14 - cyclin-dependent kinase 14, ABCA1 - atp-binding cassette, sub-family a (abc1), member 1, CDC34 - cell division c…
GO:0046677	response to antibiotic	0.000161	0.0129	2.86	5073	74	359	15	[RGS19 - regulator of g-protein signaling 19, DNMT3A - dna (cytosine-5-)-methyltransferase 3 alpha, XRN1 - 5'-3' exoribonuclease 1, ABL1 - c-abl oncogene 1, non-receptor tyrosine kinase, HSP90AA1 - heat shock protein 90kda alpha (cytosolic), class a member 1, HMGCR - 3-hydroxy-3-methylglutaryl-coa reductase, HDAC2 - histone deacetylase 2, PRKCE - protein kinase c, epsilon, PPP2CB - protein phosph…
GO:0048869	cellular developmental process	0.000161	0.0128	1.52	5073	631	359	68	[SLC4A10 - solute carrier family 4, sodium bicarbonate transporter, member 10, PRKACA - protein kinase, camp-dependent, catalytic, alpha, MTOR - mechanistic target of rapamycin (serine/threonine kinase), USH2A - usher syndrome 2a (autosomal recessive, mild), ANXA7 - annexin a7, ABL1 - c-abl oncogene 1, non-receptor tyrosine kinase, HTRA2 - htra serine peptidase 2, IQGAP1 - iq motif containing gtp…
GO:0034097	response to cytokine	0.000162	0.0128	2.26	5073	144	359	23	[SMARCA5 - swi/snf related, matrix associated, actin dependent regulator of chromatin, subfamily a, member 5, PCK1 - phosphoenolpyruvate carboxykinase 1 (soluble), CDC34 - cell division cycle 34, DAB2IP - dab2 interacting protein, CACTIN - cactin, spliceosome c complex subunit, EPRS - glutamyl-prolyl-trna synthetase, PRKCI - protein kinase c, iota, HTRA2 - htra serine peptidase 2, OXSR1 - oxidati…
GO:0044260	cellular macromolecule metabolic process	0.000179	0.014	1.25	5073	1780	359	158	[MEX3C - mex-3 rna binding family member c, REV3L - rev3-like, polymerase (dna directed), zeta, catalytic subunit, ABCA1 - atp-binding cassette, sub-family a (abc1), member 1, GFM2 - g elongation factor, mitochondrial 2, CDC34 - cell division cycle 34, DYRK4 - dual-specificity tyrosine-(y)-phosphorylation regulated kinase 4, XRN1 - 5'-3' exoribonuclease 1, ABL1 - c-abl oncogene 1, non-receptor ty…
GO:0006357	regulation of transcription by RNA polymerase II	0.000187	0.0146	1.58	5073	529	359	59	[XPO1 - exportin 1 (crm1 homolog, yeast), KDM2B - lysine (k)-specific demethylase 2b, SCAP - srebf chaperone, ABL1 - c-abl oncogene 1, non-receptor tyrosine kinase, FOXJ3 - forkhead box j3, TNKS - tankyrase, trf1-interacting ankyrin-related adp-ribose polymerase, PSMA2 - proteasome (prosome, macropain) subunit, alpha type, 2, NOTCH1 - notch 1, GTF2B - general transcription factor iib, WT1 - wilms…
GO:0032268	regulation of cellular protein metabolic process	0.000189	0.0146	1.45	5073	790	359	81	[XDH - xanthine dehydrogenase, MAPRE3 - microtubule-associated protein, rp/eb family, member 3, GTPBP2 - gtp binding protein 2, PRKACA - protein kinase, camp-dependent, catalytic, alpha, MTOR - mechanistic target of rapamycin (serine/threonine kinase), XPO1 - exportin 1 (crm1 homolog, yeast), RPL11 - ribosomal protein l11, VPS35 - vacuolar protein sorting 35 homolog (s. cerevisiae), XRN1 - 5'-3' …
GO:0048585	negative regulation of response to stimulus	0.000191	0.0147	1.66	5073	416	359	49	[RGS19 - regulator of g-protein signaling 19, XDH - xanthine dehydrogenase, PRKACA - protein kinase, camp-dependent, catalytic, alpha, MTOR - mechanistic target of rapamycin (serine/threonine kinase), CDC34 - cell division cycle 34, VPS35 - vacuolar protein sorting 35 homolog (s. cerevisiae), MARK3 - map/microtubule affinity-regulating kinase 3, ABL1 - c-abl oncogene 1, non-receptor tyrosine kina…
GO:0016043	cellular component organization	0.000192	0.0146	1.24	5073	1877	359	165	[MAPRE3 - microtubule-associated protein, rp/eb family, member 3, ELOF1 - elongation factor 1 homolog (s. cerevisiae), ABCA1 - atp-binding cassette, sub-family a (abc1), member 1, GFM2 - g elongation factor, mitochondrial 2, ANXA7 - annexin a7, SCAP - srebf chaperone, ABL1 - c-abl oncogene 1, non-receptor tyrosine kinase, HTRA2 - htra serine peptidase 2, C2CD5 - c2 calcium-dependent domain contai…
GO:2000026	regulation of multicellular organismal development	0.000192	0.0146	1.62	5073	461	359	53	[XDH - xanthine dehydrogenase, PRKACA - protein kinase, camp-dependent, catalytic, alpha, MTOR - mechanistic target of rapamycin (serine/threonine kinase), VPS35 - vacuolar protein sorting 35 homolog (s. cerevisiae), ABL1 - c-abl oncogene 1, non-receptor tyrosine kinase, IQGAP1 - iq motif containing gtpase activating protein 1, PSMA2 - proteasome (prosome, macropain) subunit, alpha type, 2, NOTCH…
GO:0051240	positive regulation of multicellular organismal process	0.000194	0.0146	1.71	5073	372	359	45	[ATP2A1 - atpase, ca++ transporting, cardiac muscle, fast twitch 1, ACVR2A - activin a receptor, type iia, MTOR - mechanistic target of rapamycin (serine/threonine kinase), ABCA1 - atp-binding cassette, sub-family a (abc1), member 1, KDM2B - lysine (k)-specific demethylase 2b, DAB2IP - dab2 interacting protein, ABL1 - c-abl oncogene 1, non-receptor tyrosine kinase, IQGAP1 - iq motif containing gt…
GO:0071219	cellular response to molecule of bacterial origin	0.000201	0.015	4.1	5073	31	359	9	[DAB2IP - dab2 interacting protein, CACTIN - cactin, spliceosome c complex subunit, ABL1 - c-abl oncogene 1, non-receptor tyrosine kinase, PDE4D - phosphodiesterase 4d, camp-specific, UPF1 - upf1 regulator of nonsense transcripts homolog (yeast), PRPF8 - pre-mrna processing factor 8, ABCA1 - atp-binding cassette, sub-family a (abc1), member 1, CTR9 - ctr9, paf1/rna polymerase ii complex component…
GO:0071840	cellular component organization or biogenesis	0.000203	0.015	1.24	5073	1906	359	167	[MAPRE3 - microtubule-associated protein, rp/eb family, member 3, ELOF1 - elongation factor 1 homolog (s. cerevisiae), ABCA1 - atp-binding cassette, sub-family a (abc1), member 1, GFM2 - g elongation factor, mitochondrial 2, ANXA7 - annexin a7, SCAP - srebf chaperone, ABL1 - c-abl oncogene 1, non-receptor tyrosine kinase, HTRA2 - htra serine peptidase 2, C2CD5 - c2 calcium-dependent domain contai…
GO:0032270	positive regulation of cellular protein metabolic process	0.00021	0.0155	1.64	5073	440	359	51	[XDH - xanthine dehydrogenase, MAPRE3 - microtubule-associated protein, rp/eb family, member 3, PRKACA - protein kinase, camp-dependent, catalytic, alpha, MTOR - mechanistic target of rapamycin (serine/threonine kinase), VPS35 - vacuolar protein sorting 35 homolog (s. cerevisiae), EIF3D - eukaryotic translation initiation factor 3, subunit d, ABL1 - c-abl oncogene 1, non-receptor tyrosine kinase,…
GO:0007018	microtubule-based movement	0.00023	0.0169	2.25	5073	138	359	22	[DNAH17 - dynein, axonemal, heavy chain 17, DYNC1I1 - dynein, cytoplasmic 1, intermediate chain 1, KIF13A - kinesin family member 13a, AP3B2 - adaptor-related protein complex 3, beta 2 subunit, TNPO1 - transportin 1, DNAH2 - dynein, axonemal, heavy chain 2, DNAH10 - dynein, axonemal, heavy chain 10, KIF21B - kinesin family member 21b, KIF6 - kinesin family member 6, KIF11 - kinesin family member …
GO:0042176	regulation of protein catabolic process	0.000246	0.0179	2.2	5073	148	359	23	[MAPK9 - mitogen-activated protein kinase 9, PRKACA - protein kinase, camp-dependent, catalytic, alpha, OGT - o-linked n-acetylglucosamine (glcnac) transferase, GGA3 - golgi-associated, gamma adaptin ear containing, arf binding protein 3, EEF1A1 - eukaryotic translation elongation factor 1 alpha 1, WWP2 - ww domain containing e3 ubiquitin protein ligase 2, XPO1 - exportin 1 (crm1 homolog, yeast),…
GO:0018107	peptidyl-threonine phosphorylation	0.000262	0.0189	3.97	5073	32	359	9	[CAD - carbamoyl-phosphate synthetase 2, aspartate transcarbamylase, and dihydroorotase, CDK5 - cyclin-dependent kinase 5, VRK1 - vaccinia related kinase 1, OXSR1 - oxidative stress responsive 1, PRKACA - protein kinase, camp-dependent, catalytic, alpha, TNKS - tankyrase, trf1-interacting ankyrin-related adp-ribose polymerase, DYRK1A - dual-specificity tyrosine-(y)-phosphorylation regulated kinas…
GO:0050801	ion homeostasis	0.000267	0.0192	2.1	5073	168	359	25	[BTBD9 - btb (poz) domain containing 9, ATP2A1 - atpase, ca++ transporting, cardiac muscle, fast twitch 1, SLC4A10 - solute carrier family 4, sodium bicarbonate transporter, member 10, PRKACA - protein kinase, camp-dependent, catalytic, alpha, GLRX3 - glutaredoxin 3, GLS - glutaminase, ABCA1 - atp-binding cassette, sub-family a (abc1), member 1, ABCB11 - atp-binding cassette, sub-family b (mdr/ta…
GO:0043412	macromolecule modification	0.000285	0.0204	1.34	5073	1150	359	109	[MEX3C - mex-3 rna binding family member c, ABCA1 - atp-binding cassette, sub-family a (abc1), member 1, CDC34 - cell division cycle 34, DYRK4 - dual-specificity tyrosine-(y)-phosphorylation regulated kinase 4, ABL1 - c-abl oncogene 1, non-receptor tyrosine kinase, FBXO45 - f-box protein 45, PSMA2 - proteasome (prosome, macropain) subunit, alpha type, 2, GTF2B - general transcription factor iib, …
GO:0097306	cellular response to alcohol	0.00029	0.0206	4.95	5073	20	359	7	[XRN1 - 5'-3' exoribonuclease 1, RAD51 - rad51 recombinase, HMGCS1 - 3-hydroxy-3-methylglutaryl-coa synthase 1 (soluble), PRKCE - protein kinase c, epsilon, DNMT3A - dna (cytosine-5-)-methyltransferase 3 alpha, ABCA1 - atp-binding cassette, sub-family a (abc1), member 1, ADCY2 - adenylate cyclase 2 (brain)]
GO:1903506	regulation of nucleic acid-templated transcription	0.000291	0.0205	1.43	5073	788	359	80	[MAPRE3 - microtubule-associated protein, rp/eb family, member 3, MTOR - mechanistic target of rapamycin (serine/threonine kinase), CDK14 - cyclin-dependent kinase 14, XPO1 - exportin 1 (crm1 homolog, yeast), ELOF1 - elongation factor 1 homolog (s. cerevisiae), KDM2B - lysine (k)-specific demethylase 2b, MARS - methionyl-trna synthetase, SCAP - srebf chaperone, ABL1 - c-abl oncogene 1, non-recept…
GO:0043436	oxoacid metabolic process	0.000299	0.0209	1.69	5073	368	359	44	[DLD - dihydrolipoamide dehydrogenase, MTR - 5-methyltetrahydrofolate-homocysteine methyltransferase, MCCC1 - methylcrotonoyl-coa carboxylase 1 (alpha), ALDH8A1 - aldehyde dehydrogenase 8 family, member a1, SUCLA2 - succinate-coa ligase, adp-forming, beta subunit, GLS - glutaminase, SDHA - succinate dehydrogenase complex, subunit a, flavoprotein (fp), SUCLG1 - succinate-coa ligase, alpha subunit,…
GO:0009896	positive regulation of catabolic process	0.000301	0.021	2.17	5073	150	359	23	[MAPK9 - mitogen-activated protein kinase 9, CNOT1 - ccr4-not transcription complex, subunit 1, GGA3 - golgi-associated, gamma adaptin ear containing, arf binding protein 3, AGO2 - argonaute risc catalytic component 2, PABPC1 - poly(a) binding protein, cytoplasmic 1, YTHDF2 - yth domain family, member 2, WWP2 - ww domain containing e3 ubiquitin protein ligase 2, PHB2 - prohibitin 2, CSNK1E - case…
GO:2001141	regulation of RNA biosynthetic process	0.000303	0.021	1.43	5073	789	359	80	[MAPRE3 - microtubule-associated protein, rp/eb family, member 3, MTOR - mechanistic target of rapamycin (serine/threonine kinase), CDK14 - cyclin-dependent kinase 14, XPO1 - exportin 1 (crm1 homolog, yeast), ELOF1 - elongation factor 1 homolog (s. cerevisiae), KDM2B - lysine (k)-specific demethylase 2b, MARS - methionyl-trna synthetase, SCAP - srebf chaperone, ABL1 - c-abl oncogene 1, non-recept…
GO:0051252	regulation of RNA metabolic process	0.000306	0.0211	1.4	5073	900	359	89	[MAPRE3 - microtubule-associated protein, rp/eb family, member 3, MTOR - mechanistic target of rapamycin (serine/threonine kinase), CDK14 - cyclin-dependent kinase 14, XPO1 - exportin 1 (crm1 homolog, yeast), ELOF1 - elongation factor 1 homolog (s. cerevisiae), KDM2B - lysine (k)-specific demethylase 2b, MARS - methionyl-trna synthetase, XRN1 - 5'-3' exoribonuclease 1, SCAP - srebf chaperone, ABL…
GO:0006355	regulation of transcription, DNA-templated	0.000321	0.022	1.44	5073	766	359	78	[MAPRE3 - microtubule-associated protein, rp/eb family, member 3, MTOR - mechanistic target of rapamycin (serine/threonine kinase), CDK14 - cyclin-dependent kinase 14, XPO1 - exportin 1 (crm1 homolog, yeast), ELOF1 - elongation factor 1 homolog (s. cerevisiae), KDM2B - lysine (k)-specific demethylase 2b, MARS - methionyl-trna synthetase, SCAP - srebf chaperone, ABL1 - c-abl oncogene 1, non-recept…
GO:0034204	lipid translocation	0.00033	0.0224	9.42	5073	6	359	4	[ATP8B2 - atpase, aminophospholipid transporter, class i, type 8b, member 2, RFT1 - rft1 homolog (s. cerevisiae), ABCB1 - atp-binding cassette, sub-family b (mdr/tap), member 1, ABCA1 - atp-binding cassette, sub-family a (abc1), member 1]
GO:0031329	regulation of cellular catabolic process	0.000336	0.0227	1.67	5073	381	359	45	[CNOT1 - ccr4-not transcription complex, subunit 1, ERCC4 - excision repair cross-complementing rodent repair deficiency, complementation group 4, PRKACA - protein kinase, camp-dependent, catalytic, alpha, EEF1A1 - eukaryotic translation elongation factor 1 alpha 1, PABPC1 - poly(a) binding protein, cytoplasmic 1, MTOR - mechanistic target of rapamycin (serine/threonine kinase), XPO1 - exportin 1…
GO:1901652	response to peptide	0.000343	0.023	2.42	5073	105	359	18	[CAD - carbamoyl-phosphate synthetase 2, aspartate transcarbamylase, and dihydroorotase, CDK5 - cyclin-dependent kinase 5, SNX6 - sorting nexin 6, PCK1 - phosphoenolpyruvate carboxykinase 1 (soluble), PRKACA - protein kinase, camp-dependent, catalytic, alpha, OGT - o-linked n-acetylglucosamine (glcnac) transferase, MTOR - mechanistic target of rapamycin (serine/threonine kinase), MARS - methionyl…
GO:0014015	positive regulation of gliogenesis	0.000348	0.0232	5.65	5073	15	359	6	[PRKCI - protein kinase c, iota, HDAC2 - histone deacetylase 2, PRMT5 - protein arginine methyltransferase 5, MTOR - mechanistic target of rapamycin (serine/threonine kinase), NOTCH1 - notch 1, PPP1CC - protein phosphatase 1, catalytic subunit, gamma isozyme]
GO:0090304	nucleic acid metabolic process	0.00035	0.0232	1.35	5073	1092	359	104	[REV3L - rev3-like, polymerase (dna directed), zeta, catalytic subunit, ELOF1 - elongation factor 1 homolog (s. cerevisiae), CDC34 - cell division cycle 34, XRN1 - 5'-3' exoribonuclease 1, ABL1 - c-abl oncogene 1, non-receptor tyrosine kinase, RECQL - recq protein-like (dna helicase q1-like), UPF1 - upf1 regulator of nonsense transcripts homolog (yeast), PRPF8 - pre-mrna processing factor 8, GTF2…
GO:1900221	regulation of amyloid-beta clearance	0.000352	0.0232	14.13	5073	3	359	3	[CYP51A1 - cytochrome p450, family 51, subfamily a, polypeptide 1, HMGCR - 3-hydroxy-3-methylglutaryl-coa reductase, SRF - serum response factor (c-fos serum response element-binding transcription factor)]
GO:1900222	negative regulation of amyloid-beta clearance	0.000352	0.023	14.13	5073	3	359	3	[CYP51A1 - cytochrome p450, family 51, subfamily a, polypeptide 1, HMGCR - 3-hydroxy-3-methylglutaryl-coa reductase, SRF - serum response factor (c-fos serum response element-binding transcription factor)]
GO:1904528	positive regulation of microtubule binding	0.000352	0.0229	14.13	5073	3	359	3	[ABL1 - c-abl oncogene 1, non-receptor tyrosine kinase, MAPRE3 - microtubule-associated protein, rp/eb family, member 3, PPP2CB - protein phosphatase 2, catalytic subunit, beta isozyme]
GO:0006082	organic acid metabolic process	0.000358	0.0232	1.68	5073	371	359	44	[DLD - dihydrolipoamide dehydrogenase, MTR - 5-methyltetrahydrofolate-homocysteine methyltransferase, MCCC1 - methylcrotonoyl-coa carboxylase 1 (alpha), ALDH8A1 - aldehyde dehydrogenase 8 family, member a1, SUCLA2 - succinate-coa ligase, adp-forming, beta subunit, GLS - glutaminase, SDHA - succinate dehydrogenase complex, subunit a, flavoprotein (fp), SUCLG1 - succinate-coa ligase, alpha subunit,…
GO:0016310	phosphorylation	0.000358	0.0231	1.68	5073	371	359	44	[GRK5 - g protein-coupled receptor kinase 5, TEC - tec protein tyrosine kinase, PRKACA - protein kinase, camp-dependent, catalytic, alpha, ACVR2A - activin a receptor, type iia, CCNE1 - cyclin e1, CDK14 - cyclin-dependent kinase 14, MTOR - mechanistic target of rapamycin (serine/threonine kinase), RIOK1 - rio kinase 1, DYRK4 - dual-specificity tyrosine-(y)-phosphorylation regulated kinase 4, DAB2…
GO:0048588	developmental cell growth	0.000409	0.0262	4.71	5073	21	359	7	[ARIH2 - ariadne homolog 2 (drosophila), CDK5 - cyclin-dependent kinase 5, MEX3C - mex-3 rna binding family member c, HSP90AA1 - heat shock protein 90kda alpha (cytosolic), class a member 1, ABL1 - c-abl oncogene 1, non-receptor tyrosine kinase, USP9X - ubiquitin specific peptidase 9, x-linked, IQGAP1 - iq motif containing gtpase activating protein 1]
GO:0034641	cellular nitrogen compound metabolic process	0.000415	0.0264	1.27	5073	1526	359	137	[MCCC1 - methylcrotonoyl-coa carboxylase 1 (alpha), REV3L - rev3-like, polymerase (dna directed), zeta, catalytic subunit, SUCLA2 - succinate-coa ligase, adp-forming, beta subunit, ELOF1 - elongation factor 1 homolog (s. cerevisiae), CDC34 - cell division cycle 34, GFM2 - g elongation factor, mitochondrial 2, XRN1 - 5'-3' exoribonuclease 1, ABL1 - c-abl oncogene 1, non-receptor tyrosine kinase, H…
GO:0051726	regulation of cell cycle	0.000421	0.0266	1.57	5073	487	359	54	[MAPRE3 - microtubule-associated protein, rp/eb family, member 3, PRKACA - protein kinase, camp-dependent, catalytic, alpha, CDK14 - cyclin-dependent kinase 14, MTOR - mechanistic target of rapamycin (serine/threonine kinase), XPO1 - exportin 1 (crm1 homolog, yeast), ABL1 - c-abl oncogene 1, non-receptor tyrosine kinase, IQGAP1 - iq motif containing gtpase activating protein 1, HTRA2 - htra serin…
GO:0071216	cellular response to biotic stimulus	0.000428	0.0269	3.45	5073	41	359	10	[DAB2IP - dab2 interacting protein, CACTIN - cactin, spliceosome c complex subunit, ABL1 - c-abl oncogene 1, non-receptor tyrosine kinase, PDE4D - phosphodiesterase 4d, camp-specific, HSPA5 - heat shock 70kda protein 5 (glucose-regulated protein, 78kda), UPF1 - upf1 regulator of nonsense transcripts homolog (yeast), PRPF8 - pre-mrna processing factor 8, ABCA1 - atp-binding cassette, sub-family a …
GO:0006796	phosphate-containing compound metabolic process	0.000447	0.028	1.45	5073	701	359	72	[XDH - xanthine dehydrogenase, PRKACA - protein kinase, camp-dependent, catalytic, alpha, SUCLA2 - succinate-coa ligase, adp-forming, beta subunit, MTOR - mechanistic target of rapamycin (serine/threonine kinase), CDK14 - cyclin-dependent kinase 14, PGD - phosphogluconate dehydrogenase, DYRK4 - dual-specificity tyrosine-(y)-phosphorylation regulated kinase 4, MARK3 - map/microtubule affinity-regu…
GO:0009966	regulation of signal transduction	0.000471	0.0293	1.41	5073	812	359	81	[XDH - xanthine dehydrogenase, RGS19 - regulator of g-protein signaling 19, PRKACA - protein kinase, camp-dependent, catalytic, alpha, MTOR - mechanistic target of rapamycin (serine/threonine kinase), CDK14 - cyclin-dependent kinase 14, ABCA1 - atp-binding cassette, sub-family a (abc1), member 1, CDC34 - cell division cycle 34, RPL11 - ribosomal protein l11, VPS35 - vacuolar protein sorting 35 ho…
GO:0006793	phosphorus metabolic process	0.000484	0.03	1.44	5073	715	359	73	[XDH - xanthine dehydrogenase, PRKACA - protein kinase, camp-dependent, catalytic, alpha, SUCLA2 - succinate-coa ligase, adp-forming, beta subunit, MTOR - mechanistic target of rapamycin (serine/threonine kinase), CDK14 - cyclin-dependent kinase 14, PGD - phosphogluconate dehydrogenase, DYRK4 - dual-specificity tyrosine-(y)-phosphorylation regulated kinase 4, MARK3 - map/microtubule affinity-regu…
GO:0045595	regulation of cell differentiation	0.000509	0.0314	1.61	5073	422	359	48	[XDH - xanthine dehydrogenase, MEX3C - mex-3 rna binding family member c, PRKACA - protein kinase, camp-dependent, catalytic, alpha, ACVR2A - activin a receptor, type iia, MTOR - mechanistic target of rapamycin (serine/threonine kinase), YTHDF2 - yth domain family, member 2, ABCA1 - atp-binding cassette, sub-family a (abc1), member 1, CTR9 - ctr9, paf1/rna polymerase ii complex component, USH2A -…
GO:0061138	morphogenesis of a branching epithelium	0.000514	0.0315	4.04	5073	28	359	8	[BTRC - beta-transducin repeat containing e3 ubiquitin protein ligase, MSX2 - msh homeobox 2, SMAD4 - smad family member 4, NOTCH1 - notch 1, SRF - serum response factor (c-fos serum response element-binding transcription factor), STK4 - serine/threonine kinase 4, PHB2 - prohibitin 2, WT1 - wilms tumor 1]
GO:0071229	cellular response to acid chemical	0.000527	0.0321	3.36	5073	42	359	10	[HTRA2 - htra serine peptidase 2, PRKCE - protein kinase c, epsilon, HDAC2 - histone deacetylase 2, PCK1 - phosphoenolpyruvate carboxykinase 1 (soluble), RRAGA - ras-related gtp binding a, DNMT3A - dna (cytosine-5-)-methyltransferase 3 alpha, GCLC - glutamate-cysteine ligase, catalytic subunit, MTOR - mechanistic target of rapamycin (serine/threonine kinase), ABCA1 - atp-binding cassette, sub-fam…
GO:0007049	cell cycle	0.000551	0.0334	1.98	5073	186	359	26	[CLTC - clathrin, heavy chain (hc), RAD54L - rad54-like (s. cerevisiae), CDC73 - cell division cycle 73, DAB2IP - dab2 interacting protein, ARL8A - adp-ribosylation factor-like 8a, ABL1 - c-abl oncogene 1, non-receptor tyrosine kinase, RPS6KA3 - ribosomal protein s6 kinase, 90kda, polypeptide 3, IK - ik cytokine, down-regulator of hla ii, USP9X - ubiquitin specific peptidase 9, x-linked, KIF13A -…
GO:0071300	cellular response to retinoic acid	0.000558	0.0336	6.42	5073	11	359	5	[HTRA2 - htra serine peptidase 2, HDAC2 - histone deacetylase 2, PCK1 - phosphoenolpyruvate carboxykinase 1 (soluble), ABCA1 - atp-binding cassette, sub-family a (abc1), member 1, PHB2 - prohibitin 2]
GO:0071347	cellular response to interleukin-1	0.000558	0.0334	6.42	5073	11	359	5	[DAB2IP - dab2 interacting protein, CACTIN - cactin, spliceosome c complex subunit, PCK1 - phosphoenolpyruvate carboxykinase 1 (soluble), UPF1 - upf1 regulator of nonsense transcripts homolog (yeast), YY1 - yy1 transcription factor]
GO:0001539	cilium or flagellum-dependent cell motility	0.000558	0.0333	6.42	5073	11	359	5	[DNAH17 - dynein, axonemal, heavy chain 17, DNAH3 - dynein, axonemal, heavy chain 3, DNAH1 - dynein, axonemal, heavy chain 1, DNAH2 - dynein, axonemal, heavy chain 2, DNAH7 - dynein, axonemal, heavy chain 7]
GO:0060285	cilium-dependent cell motility	0.000558	0.0331	6.42	5073	11	359	5	[DNAH17 - dynein, axonemal, heavy chain 17, DNAH1 - dynein, axonemal, heavy chain 1, DNAH3 - dynein, axonemal, heavy chain 3, DNAH7 - dynein, axonemal, heavy chain 7, DNAH2 - dynein, axonemal, heavy chain 2]
GO:0016049	cell growth	0.000564	0.0332	4.5	5073	22	359	7	[ARIH2 - ariadne homolog 2 (drosophila), CDK5 - cyclin-dependent kinase 5, MEX3C - mex-3 rna binding family member c, ABL1 - c-abl oncogene 1, non-receptor tyrosine kinase, HSP90AA1 - heat shock protein 90kda alpha (cytosolic), class a member 1, USP9X - ubiquitin specific peptidase 9, x-linked, IQGAP1 - iq motif containing gtpase activating protein 1]
GO:0051248	negative regulation of protein metabolic process	0.000622	0.0365	1.71	5073	314	359	38	[XDH - xanthine dehydrogenase, CNOT1 - ccr4-not transcription complex, subunit 1, GGA3 - golgi-associated, gamma adaptin ear containing, arf binding protein 3, MTOR - mechanistic target of rapamycin (serine/threonine kinase), YTHDF2 - yth domain family, member 2, RPL11 - ribosomal protein l11, VPS35 - vacuolar protein sorting 35 homolog (s. cerevisiae), XRN1 - 5'-3' exoribonuclease 1, DAB2IP - da…
GO:0031334	positive regulation of protein complex assembly	0.000622	0.0363	2.38	5073	101	359	17	[MAPK9 - mitogen-activated protein kinase 9, CNOT1 - ccr4-not transcription complex, subunit 1, ERCC4 - excision repair cross-complementing rodent repair deficiency, complementation group 4, MTOR - mechanistic target of rapamycin (serine/threonine kinase), ABCA1 - atp-binding cassette, sub-family a (abc1), member 1, PSMC6 - proteasome (prosome, macropain) 26s subunit, atpase, 6, DAB2IP - dab2 int…
GO:0051094	positive regulation of developmental process	0.000644	0.0374	1.75	5073	282	359	35	[ACVR2A - activin a receptor, type iia, MTOR - mechanistic target of rapamycin (serine/threonine kinase), KDM2B - lysine (k)-specific demethylase 2b, VPS35 - vacuolar protein sorting 35 homolog (s. cerevisiae), DAB2IP - dab2 interacting protein, ABL1 - c-abl oncogene 1, non-receptor tyrosine kinase, IQGAP1 - iq motif containing gtpase activating protein 1, RPS6KA3 - ribosomal protein s6 kinase, 9…
GO:0031397	negative regulation of protein ubiquitination	0.000682	0.0394	3.53	5073	36	359	9	[CDK5 - cyclin-dependent kinase 5, TRIP12 - thyroid hormone receptor interactor 12, ABL1 - c-abl oncogene 1, non-receptor tyrosine kinase, PRKCE - protein kinase c, epsilon, OGT - o-linked n-acetylglucosamine (glcnac) transferase, GCLC - glutamate-cysteine ligase, catalytic subunit, MTOR - mechanistic target of rapamycin (serine/threonine kinase), GTPBP4 - gtp binding protein 4, RPL11 - ribosomal…
GO:0009653	anatomical structure morphogenesis	0.000705	0.0405	1.69	5073	327	359	39	[DLD - dihydrolipoamide dehydrogenase, SLC4A10 - solute carrier family 4, sodium bicarbonate transporter, member 10, ACTN1 - actinin, alpha 1, ACVR2A - activin a receptor, type iia, MTOR - mechanistic target of rapamycin (serine/threonine kinase), YTHDF2 - yth domain family, member 2, USH2A - usher syndrome 2a (autosomal recessive, mild), KDM2B - lysine (k)-specific demethylase 2b, DAB2IP - dab2 …
GO:0031331	positive regulation of cellular catabolic process	0.000709	0.0405	2.17	5073	130	359	20	[MAPK9 - mitogen-activated protein kinase 9, CNOT1 - ccr4-not transcription complex, subunit 1, AGO2 - argonaute risc catalytic component 2, PABPC1 - poly(a) binding protein, cytoplasmic 1, YTHDF2 - yth domain family, member 2, PHB2 - prohibitin 2, NNT - nicotinamide nucleotide transhydrogenase, ARIH2 - ariadne homolog 2 (drosophila), CSNK1E - casein kinase 1, epsilon, DAB2IP - dab2 interacting p…
GO:0007166	cell surface receptor signaling pathway	0.000717	0.0407	1.54	5073	486	359	53	[PRKACA - protein kinase, camp-dependent, catalytic, alpha, CDK14 - cyclin-dependent kinase 14, ABCA1 - atp-binding cassette, sub-family a (abc1), member 1, VPS35 - vacuolar protein sorting 35 homolog (s. cerevisiae), ABL1 - c-abl oncogene 1, non-receptor tyrosine kinase, TLN1 - talin 1, IQGAP1 - iq motif containing gtpase activating protein 1, C2CD5 - c2 calcium-dependent domain containing 5, TN…
GO:0071371	cellular response to gonadotropin stimulus	0.000727	0.0411	8.07	5073	7	359	4	[HMGCS1 - 3-hydroxy-3-methylglutaryl-coa synthase 1 (soluble), GCLC - glutamate-cysteine ligase, catalytic subunit, NOTCH1 - notch 1, WT1 - wilms tumor 1]
GO:1902808	positive regulation of cell cycle G1/S phase transition	0.000762	0.0429	4.3	5073	23	359	7	[TFDP1 - transcription factor dp-1, ANKRD17 - ankyrin repeat domain 17, RDX - radixin, CUL4A - cullin 4a, EZH2 - enhancer of zeste homolog 2 (drosophila), CDC73 - cell division cycle 73, PHB2 - prohibitin 2]
GO:0030900	forebrain development	0.000763	0.0427	4.99	5073	17	359	6	[TOP2B - topoisomerase (dna) ii beta 180kda, HTRA2 - htra serine peptidase 2, DYNC2H1 - dynein, cytoplasmic 2, heavy chain 1, MYO1D - myosin id, NOTCH1 - notch 1, KDM2B - lysine (k)-specific demethylase 2b]
GO:0034248	regulation of cellular amide metabolic process	0.000774	0.0431	1.96	5073	180	359	25	[CNOT1 - ccr4-not transcription complex, subunit 1, GTPBP2 - gtp binding protein 2, GGA3 - golgi-associated, gamma adaptin ear containing, arf binding protein 3, NAT10 - n-acetyltransferase 10 (gcn5-related), EEF1A1 - eukaryotic translation elongation factor 1 alpha 1, MTOR - mechanistic target of rapamycin (serine/threonine kinase), PABPC1 - poly(a) binding protein, cytoplasmic 1, YTHDF2 - yth d…
GO:0090257	regulation of muscle system process	0.000783	0.0434	3.21	5073	44	359	10	[ATP2A1 - atpase, ca++ transporting, cardiac muscle, fast twitch 1, PRKACA - protein kinase, camp-dependent, catalytic, alpha, PPP3CA - protein phosphatase 3, catalytic subunit, alpha isozyme, SMAD4 - smad family member 4, PDE4D - phosphodiesterase 4d, camp-specific, GLRX3 - glutaredoxin 3, MTOR - mechanistic target of rapamycin (serine/threonine kinase), YY1 - yy1 transcription factor, NOTCH1 - …
GO:0046903	secretion	0.000795	0.0439	1.7	5073	307	359	37	[XDH - xanthine dehydrogenase, UBR4 - ubiquitin protein ligase e3 component n-recognin 4, ACTN1 - actinin, alpha 1, GTPBP2 - gtp binding protein 2, GLS - glutaminase, EEF1A1 - eukaryotic translation elongation factor 1 alpha 1, ABCA1 - atp-binding cassette, sub-family a (abc1), member 1, ABCB11 - atp-binding cassette, sub-family b (mdr/tap), member 11, ARL8A - adp-ribosylation factor-like 8a, AGL…
GO:0009314	response to radiation	0.000823	0.0452	2.2	5073	122	359	19	[CDK5 - cyclin-dependent kinase 5, SLC4A10 - solute carrier family 4, sodium bicarbonate transporter, member 10, ERCC4 - excision repair cross-complementing rodent repair deficiency, complementation group 4, FIGNL1 - fidgetin-like 1, RAD54L - rad54-like (s. cerevisiae), DNMT3A - dna (cytosine-5-)-methyltransferase 3 alpha, UBE2A - ubiquitin-conjugating enzyme e2a, MTOR - mechanistic target of rap…
GO:0046777	protein autophosphorylation	0.000823	0.0449	2.83	5073	60	359	12	[GRK5 - g protein-coupled receptor kinase 5, CDK5 - cyclin-dependent kinase 5, CAD - carbamoyl-phosphate synthetase 2, aspartate transcarbamylase, and dihydroorotase, MARK3 - map/microtubule affinity-regulating kinase 3, VRK1 - vaccinia related kinase 1, ABL1 - c-abl oncogene 1, non-receptor tyrosine kinase, OXSR1 - oxidative stress responsive 1, TEC - tec protein tyrosine kinase, PRKACA - protei…
GO:0032868	response to insulin	0.000824	0.0448	2.99	5073	52	359	11	[MARS - methionyl-trna synthetase, CAD - carbamoyl-phosphate synthetase 2, aspartate transcarbamylase, and dihydroorotase, SCAP - srebf chaperone, EPRS - glutamyl-prolyl-trna synthetase, PRKCI - protein kinase c, iota, C2CD5 - c2 calcium-dependent domain containing 5, PCK1 - phosphoenolpyruvate carboxykinase 1 (soluble), OGT - o-linked n-acetylglucosamine (glcnac) transferase, GCLC - glutamate-cy…
GO:1903364	positive regulation of cellular protein catabolic process	0.000824	0.0446	2.99	5073	52	359	11	[CSNK1E - casein kinase 1, epsilon, ARIH2 - ariadne homolog 2 (drosophila), DAB2IP - dab2 interacting protein, VPS35 - vacuolar protein sorting 35 homolog (s. cerevisiae), MAPK9 - mitogen-activated protein kinase 9, HSP90AA1 - heat shock protein 90kda alpha (cytosolic), class a member 1, CSNK1A1 - casein kinase 1, alpha 1, PSMC2 - proteasome (prosome, macropain) 26s subunit, atpase, 2, RDX - radi…
GO:0001763	morphogenesis of a branching structure	0.000854	0.046	3.77	5073	30	359	8	[BTRC - beta-transducin repeat containing e3 ubiquitin protein ligase, MSX2 - msh homeobox 2, SMAD4 - smad family member 4, NOTCH1 - notch 1, STK4 - serine/threonine kinase 4, SRF - serum response factor (c-fos serum response element-binding transcription factor), PHB2 - prohibitin 2, WT1 - wilms tumor 1]
GO:0051272	positive regulation of cellular component movement	0.000856	0.0458	2.25	5073	113	359	18	[ATP2A1 - atpase, ca++ transporting, cardiac muscle, fast twitch 1, PPP3CA - protein phosphatase 3, catalytic subunit, alpha isozyme, AGO2 - argonaute risc catalytic component 2, MTOR - mechanistic target of rapamycin (serine/threonine kinase), DAB2IP - dab2 interacting protein, ABL1 - c-abl oncogene 1, non-receptor tyrosine kinase, IQGAP1 - iq motif containing gtpase activating protein 1, PRKCE …
GO:0030335	positive regulation of cell migration	0.000879	0.0469	2.31	5073	104	359	17	[PPP3CA - protein phosphatase 3, catalytic subunit, alpha isozyme, AGO2 - argonaute risc catalytic component 2, MTOR - mechanistic target of rapamycin (serine/threonine kinase), DAB2IP - dab2 interacting protein, ABL1 - c-abl oncogene 1, non-receptor tyrosine kinase, IQGAP1 - iq motif containing gtpase activating protein 1, PRKCE - protein kinase c, epsilon, OXSR1 - oxidative stress responsive 1,…
GO:0002682	regulation of immune system process	0.000933	0.0495	1.64	5073	354	359	41	[TEC - tec protein tyrosine kinase, PRKACA - protein kinase, camp-dependent, catalytic, alpha, AP1G1 - adaptor-related protein complex 1, gamma 1 subunit, ABCE1 - atp-binding cassette, sub-family e (oabp), member 1, ACVR2A - activin a receptor, type iia, MTOR - mechanistic target of rapamycin (serine/threonine kinase), YTHDF2 - yth domain family, member 2, CTR9 - ctr9, paf1/rna polymerase ii comp…
GO:0045055	regulated exocytosis	0.00095	0.0502	1.88	5073	203	359	27	[UBR4 - ubiquitin protein ligase e3 component n-recognin 4, ACTN1 - actinin, alpha 1, GTPBP2 - gtp binding protein 2, EEF1A1 - eukaryotic translation elongation factor 1 alpha 1, AGL - amylo-alpha-1, 6-glucosidase, 4-alpha-glucanotransferase, ARL8A - adp-ribosylation factor-like 8a, TLN1 - talin 1, IQGAP1 - iq motif containing gtpase activating protein 1, RAB24 - rab24, member ras oncogene family…
GO:0048584	positive regulation of response to stimulus	0.000995	0.0523	1.5	5073	528	359	56	[XDH - xanthine dehydrogenase, AP1G1 - adaptor-related protein complex 1, gamma 1 subunit, PRKACA - protein kinase, camp-dependent, catalytic, alpha, MTOR - mechanistic target of rapamycin (serine/threonine kinase), RPL11 - ribosomal protein l11, VPS35 - vacuolar protein sorting 35 homolog (s. cerevisiae), ABL1 - c-abl oncogene 1, non-receptor tyrosine kinase, IQGAP1 - iq motif containing gtpase …

## Sheet: Supplemental Table S5
Supplemental Table S5. Accessibility deviation scores of JASPAR motifs across Amphimedon developmental stages.
	S4_white1	S5_white2	S6_white3	S7_brown1	S8_brown2	S9_brown3	S21_cloud1	S22_cloud2	S23_cloud3	S10_spot1	S11_spot2	S12_spot3	S13_ring1	S14_ring2	S15_ring3	S16_latering1	S17_latering2	S1_larvae1	S2_larvae2	S3_larvae3	S19_adult54	S20_adult61	S24_adult65	t.test_white_brown.p	t.test_brown_cloud.p	t.test_cloud_spot.p	t.test_spot_ring.p	t.test_ring_lring.p	t.test_lring_larva.p	t.test_larva_adult.p	t.test_early_mid.p	t.test_mid_late.p
MA0025.1_NFIL3	-2.21342	-1.26199	-1.76333	-0.483538	1.50148	0.08386	-1.21538	-0.539298	0.315755	-0.974109	0.821765	0.775248	-0.0488238	0.956029	-0.806138	-0.709914	0.538923	2.26425	2.76	4.49634	-1.46435	-2.45918	1.03516	0.0517875	0.319732	0.408635	0.834859	0.89459	0.0428576	0.0363995	0.426971	0.318105
MA0030.1_FOXF2	-4.17293	-1.18197	-3.94998	1.98973	1.51186	-0.614155	2.04078	-0.206549	1.86241	0.394997	1.39112	0.0458281	0.824691	1.05628	1.10939	-0.345386	-3.7209	-1.18185	0.767608	5.59982	-1.48989	-1.71366	1.23084	0.0329626	0.814757	0.504294	0.440586	0.322905	0.250269	0.366435	0.128067	0.389101
MA0031.1_FOXD1	-4.89318	-3.79447	-3.63223	1.56848	-0.345052	-0.577428	1.101	-0.23437	-0.843864	2.11719	1.02653	4.63968	1.14557	2.8194	-0.413828	0.978025	-0.259022	2.32402	1.54345	3.5965	-0.78925	-0.715422	-1.94874	0.00985903	0.827195	0.121093	0.377662	0.515233	0.102613	0.0102648	0.0328732	0.577186
MA0051.1_IRF2	0.672277	0.196375	1.52847	0.0323815	0.595536	-0.871572	-0.910796	-0.981053	-0.719099	-1.13435	-0.128373	0.498046	1.1624	-0.116128	0.298851	0.246734	-0.209518	-3.45792	2.60302	1.80515	-0.263416	0.713943	-1.07048	0.203245	0.20295	0.324119	0.313871	0.402231	0.890219	0.812509	0.0514034	0.205216
MA0056.1_MZF1	-4.16882	-3.74498	-2.62686	-0.959864	-2.16024	-4.92118	-1.03569	0.0837421	-0.451127	1.57486	3.25324	2.03595	2.96748	2.29993	3.5771	4.37967	0.77599	-0.0315175	4.71382	5.53656	1.15093	-1.15318	-4.57288	0.562206	0.19366	0.0141884	0.353084	0.871491	0.765385	0.109579	0.0012382	0.445922
MA0057.1_MZF1(var.2)	0.589553	1.22402	0.340145	-1.33811	-0.364303	-1.9532	-1.67255	-1.64648	-0.106225	-0.787358	1.27559	1.32141	1.27669	2.69122	0.395843	0.707947	0.126881	-1.09334	1.27707	1.91396	0.230695	-0.0288713	-3.65136	0.0326111	0.917333	0.120226	0.427395	0.26157	0.7928	0.30483	0.98006	0.422756
MA0059.1_MAX::MYC	6.17594	13.0524	4.89672	0.189813	7.42388	7.94188	-2.74573	-4.06147	-3.10439	-3.16631	-5.22364	-1.1318	-2.86824	-2.03274	-2.0219	-4.10147	-3.19783	-1.12189	2.28242	-1.47441	-6.63324	-5.06418	-1.67968	0.467305	0.073615	0.924834	0.542931	0.142309	0.085167	0.0851056	0.00153241	0.445232
MA0066.1_PPARG	-4.65488	-3.45918	-4.25907	0.755982	-0.703365	-3.51181	-0.554739	0.668396	1.59641	1.26837	2.79308	2.06311	1.47789	3.03982	1.55479	2.20525	0.0886844	-0.339624	3.94413	3.88037	0.357919	0.557215	-2.52739	0.132435	0.307552	0.133838	0.980673	0.55569	0.501604	0.163153	0.00471055	0.988233
MA0069.1_Pax6	-2.3258	-1.74604	-1.05925	-1.09329	-0.574666	-1.67282	-0.807566	-0.816249	-2.73336	0.690732	0.473775	2.0262	-0.285742	0.643436	0.606192	1.97677	0.31746	1.73927	2.8956	5.91039	0.632678	-0.459532	-0.796471	0.28665	0.668606	0.0387233	0.276741	0.492773	0.211563	0.082828	0.13595	0.140727
MA0070.1_PBX1	-7.23623	-5.31342	-5.95558	1.20578	-1.04047	-1.32361	2.47797	-0.217318	1.5015	-0.0775025	2.71615	1.342	1.66409	1.78608	1.5348	3.16806	1.16455	2.39136	1.89958	4.46807	-0.285595	-1.43695	-0.954878	0.00571488	0.217919	0.951595	0.71884	0.702892	0.609453	0.0261998	0.0186859	0.882871
MA0071.1_RORA	-2.76567	-1.50431	-2.62085	-1.76337	0.643445	-0.642085	-1.72289	-0.245859	-1.64952	-0.479873	0.543344	0.284714	0.607854	1.92066	1.11826	2.15519	1.197	0.916599	5.49454	1.05087	-0.831639	0.392716	-0.110418	0.117355	0.509447	0.0929246	0.0914476	0.52374	0.651162	0.213462	0.202197	0.0116553
MA0072.1_RORA(var.2)	0.544567	0.832201	0.66097	-3.22069	1.26563	-0.735306	-2.43487	-0.865178	-1.25649	-1.47768	-0.156768	0.0504586	0.410338	0.438544	1.1221	2.10171	-0.256191	2.25557	2.7358	1.62402	-1.01875	1.04048	-2.67193	0.348381	0.688202	0.214384	0.115548	0.859369	0.465839	0.0921912	0.273231	0.0121107
MA0073.1_RREB1	-3.05301	-1.46392	-3.62228	0.353883	-0.751589	-1.63402	3.55133	2.24416	1.24629	1.37756	2.97243	1.47027	-0.711772	1.01332	2.31383	-0.165973	-2.96383	-0.0810227	-0.285486	6.59652	-1.53668	-2.32073	0.157535	0.0790226	0.0273784	0.656252	0.365586	0.290785	0.265484	0.278017	0.000516112	0.0409856
MA0074.1_RXRA::VDR	-3.79113	-2.37519	-3.31867	-0.0606796	-1.96475	-2.71011	-0.0309251	-0.0655298	0.995359	-0.798127	3.16359	0.511249	0.418134	2.1418	1.92683	3.37035	-0.176332	1.93195	5.24474	2.14899	2.77472	0.46139	-0.761676	0.17297	0.125654	0.634764	0.705948	0.964093	0.550839	0.200171	0.0031482	0.161054
MA0077.1_SOX9	-4.22934	-3.11053	-3.5994	1.09687	0.083825	-1.50336	1.50716	0.540497	0.299031	1.3509	0.526653	1.44823	1.64519	2.4335	1.96879	2.44246	-0.694095	-1.29123	0.770734	4.54317	0.0099468	-0.704604	-1.40748	0.0283781	0.370545	0.528232	0.0745651	0.598544	0.854192	0.35442	0.0219304	0.920765
MA0081.1_SPIB	-4.64603	-4.41585	-4.02495	0.886237	-0.813733	-2.39256	2.76699	2.55085	1.36675	1.22456	1.7071	2.10578	1.05321	1.72416	-0.0152337	0.311788	-2.77814	-0.818967	0.750449	4.75968	0.931557	1.10933	1.59959	0.0583925	0.0686849	0.350834	0.274715	0.380752	0.311402	0.853079	0.00338067	0.0766182
MA0084.1_SRY	-2.50329	-1.27453	-3.07598	-0.523562	-0.918352	0.323793	-1.81532	-0.43306	-2.14344	-1.13947	0.325841	0.404452	2.23851	0.992968	1.25725	0.949955	0.896813	0.507851	3.63184	5.22425	0.198587	-0.723988	-2.34069	0.04814	0.171484	0.141487	0.06486	0.269365	0.253456	0.0791521	0.45413	0.019632
MA0091.1_TAL1::TCF3	-5.3308	-4.23778	-4.72296	0.247387	0.752796	-2.50224	-0.412067	-1.42205	-0.693574	1.19079	1.80278	0.112784	3.45657	2.20723	1.41629	1.60597	2.69363	3.1352	3.75662	2.26027	0.733436	-0.932519	-2.552	0.0417925	0.772538	0.0414664	0.163931	0.811998	0.313307	0.0359259	0.0526803	0.0648008
MA0101.1_REL	0.662296	2.57454	1.44951	-3.66392	0.403468	-0.11468	-2.54843	-2.89847	-2.10459	-1.08073	-0.0120041	-0.7638	1.34555	2.33011	0.988965	2.58664	-1.126	-1.06883	3.85463	1.04331	0.321289	0.072242	-2.94591	0.158499	0.39009	0.0104984	0.0146694	0.734201	0.835868	0.301319	0.10766	0.00857446
MA0107.1_RELA	0.26137	1.80355	1.2015	-2.46872	0.659126	0.744126	-0.696416	-1.36297	-2.23377	-0.734707	-1.23662	-0.586265	0.379802	0.949103	0.774683	2.35641	-0.192562	-1.00077	2.6219	1.10155	-0.168403	0.435115	-2.76018	0.30644	0.424631	0.326895	0.00418746	0.815406	0.924447	0.293071	0.0570874	0.00927631
MA0115.1_NR1H2::RXRA	-1.36899	-1.04319	-1.72791	-0.4193	0.335131	-1.20668	1.42869	-1.73122	-0.0628786	-1.90122	0.11223	-0.485584	1.3833	2.42369	0.980251	2.61585	-0.376441	-0.763091	4.64179	0.638892	-0.383843	-0.383356	-0.686681	0.154222	0.781767	0.595556	0.0376907	0.805221	0.872865	0.343899	0.45431	0.0837852
MA0119.1_NFIC::TLX1	-1.62331	-0.468578	-0.089492	-1.87267	0.502832	-1.0895	-1.90395	-2.64784	-3.31349	-0.820422	-0.809661	0.402034	0.148684	2.13078	-1.47102	1.3798	0.322297	0.857899	6.11812	5.97866	2.44038	-0.838692	-3.73956	0.918004	0.106187	0.0183126	0.592627	0.655096	0.176139	0.113123	0.298819	0.020379
MA0130.1_ZNF354C	-7.45675	-5.88083	-7.11715	0.228541	-0.00373908	-3.32918	1.91126	0.0905154	0.407477	0.64838	3.88642	1.87908	1.93471	1.4937	1.63875	5.20369	0.351309	1.32881	4.23404	7.3624	-1.00973	-0.920244	-2.69582	0.0241234	0.249137	0.304805	0.682355	0.731535	0.658652	0.0662731	0.0102592	0.816357
MA0139.1_CTCF	-9.39142	-7.13956	-6.70441	1.75319	-1.77718	-5.57772	2.63037	0.00431458	1.72814	0.300939	5.13545	4.20959	3.54947	1.2373	2.46436	1.66593	1.29714	1.1051	4.08933	7.78803	0.0228559	0.10117	-3.19152	0.0940595	0.253084	0.368839	0.659402	0.294892	0.278257	0.0907028	0.00577837	0.677458
MA0149.1_EWSR1-FLI1	-2.37857	-1.58558	-1.33703	0.471794	-1.22796	-2.22394	2.22847	3.82388	2.19543	1.18676	2.45858	0.0703808	-1.08137	1.11926	2.01178	1.4437	-3.6054	-2.10984	-3.05702	3.46413	0.604068	0.791892	0.320264	0.437227	0.0217166	0.163425	0.656053	0.61	0.887317	0.631987	0.000545465	0.0310668
MA0138.2_REST	-5.90015	-5.84865	-6.05373	0.339492	-1.4242	-3.75386	0.656218	0.013634	1.06304	1.33525	2.42527	2.64021	2.07953	1.59931	1.06191	2.07815	1.92733	1.40982	4.20249	5.22947	0.205392	1.31024	-2.6357	0.0673155	0.200498	0.040921	0.33556	0.285344	0.293271	0.0717297	0.00414172	0.667029
MA0152.1_NFATC2	1.4501	2.06322	2.35996	-4.94784	-0.882953	-0.908657	-5.35346	-5.47737	-3.37058	-2.62458	-1.96991	-2.5899	2.32916	1.83829	-0.789507	3.63163	3.90608	1.1927	9.62032	3.50472	2.27539	2.04844	-6.8396	0.0843246	0.200066	0.064609	0.0619143	0.109347	0.728484	0.227176	0.0291618	0.000828797
MA0155.1_INSM1	-1.9703	-1.05287	-2.67927	-1.53698	-0.839105	-2.62068	0.326406	1.08583	-2.24199	0.780526	1.10989	0.165587	0.761846	2.96184	1.11767	1.85843	-0.0564579	1.49435	2.8717	4.83122	0.846055	-0.186382	-3.92269	0.753944	0.307727	0.443065	0.306948	0.605556	0.220465	0.0851286	0.0104364	0.284538
MA0158.1_HOXA5	-1.4225	-1.71173	-0.813973	0.101412	4.1152	-0.0387104	-0.878856	-2.37765	-0.470715	-2.67838	-0.64204	1.22705	3.01961	-0.384654	0.827947	-0.940182	4.1819	1.05835	3.87256	2.69447	0.230245	-3.6998	-4.01086	0.181131	0.183112	0.696646	0.286755	0.887588	0.781925	0.0449894	0.359737	0.138967
MA0159.1_RARA::RXRA	-1.5427	-1.05654	-1.75618	-0.844981	-1.06774	-1.42854	1.03218	-0.638993	-0.169841	-0.961451	0.882877	0.896181	0.706535	0.401361	-0.584194	-0.835066	-0.794684	0.45198	1.69849	4.18548	1.05033	0.49015	0.493662	0.27794	0.12826	0.815503	0.900805	0.125878	0.116472	0.320578	0.00774233	0.393814
MA0160.1_NR4A2	-2.36341	-0.781822	-1.85704	-0.606607	-1.6652	-0.542602	-1.03536	-0.972098	-0.760616	0.248057	0.240754	0.480209	0.306092	2.33784	0.21889	1.41512	1.46153	-0.0942253	4.34411	1.01433	-0.612076	-0.045342	0.453134	0.288807	0.970445	0.000410087	0.458451	0.556833	0.83456	0.303523	0.0384617	0.0236001
MA0161.1_NFIC	-2.51606	-1.63219	-0.850925	-1.73647	-0.118371	-2.44898	-1.68782	-5.16481	-4.68849	-0.982775	-0.478005	-0.0326165	2.07884	1.31059	-1.49834	2.1075	1.35186	3.19879	11.5618	11.2057	1.38312	-0.876923	-5.53047	0.79797	0.147368	0.0833984	0.409926	0.424271	0.124017	0.0427981	0.545957	0.0211913
MA0163.1_PLAG1	-2.79665	-1.67886	-1.83973	0.663266	-0.459506	-1.63448	0.310665	0.706518	-0.624932	0.627055	1.28535	1.55203	-0.351589	1.91654	-0.118646	1.7254	0.324221	-0.00234617	2.84051	5.23611	-0.350698	-0.491102	-3.6558	0.117374	0.48443	0.108604	0.456761	0.630262	0.398717	0.0943893	0.0100517	0.999808
MA0018.2_CREB1	4.42717	7.33631	3.70722	-0.260948	3.91946	6.37331	-1.80199	-1.03635	-1.47122	-2.03614	-2.61817	-1.66565	-4.58523	-0.510579	-1.52939	-4.19243	-2.34093	-1.69519	-0.674104	0.0576368	-3.95821	-0.67999	1.82846	0.472919	0.130532	0.135516	0.942163	0.540249	0.170691	0.931889	0.00215631	0.865535
MA0099.2_FOS::JUN	-7.07266	-6.43115	-5.99011	-0.150202	-0.605311	-2.31405	-1.29339	1.61749	0.179396	0.768196	0.732608	0.281554	2.95867	2.23825	1.00844	0.834507	1.52569	2.49403	5.14954	3.95982	0.843804	0.721647	-0.76081	0.00573675	0.330418	0.664587	0.113553	0.276019	0.0582201	0.0227171	0.0207381	0.03101
MA0259.1_ARNT::HIF1A	-2.24424	-1.91237	-1.93542	0.673671	-0.2896	-0.658333	-0.395191	0.590663	1.3129	1.81646	1.30281	-0.33181	1.14281	-0.806758	-0.139814	0.174563	-2.26764	-0.66046	-0.034416	6.78491	-0.567728	-0.741578	1.91222	0.0322412	0.404428	0.630392	0.374908	0.522988	0.339321	0.531743	0.0153606	0.733834
MA0442.1_SOX10	-4.37487	-3.23109	-3.83849	0.0642206	2.46503	0.119148	-1.64623	-2.34831	-3.2989	-1.53591	-0.17468	-0.154754	0.669858	1.61538	-1.04221	1.36735	0.938569	2.14246	7.4039	8.62066	0.650139	1.34025	-1.91212	0.0160082	0.0319708	0.0523984	0.328543	0.445867	0.130928	0.0746378	0.962045	0.00620729
MA0462.1_BATF::JUN	-4.15289	-4.60814	-3.48126	1.32241	-0.207037	-0.908969	-0.568016	2.12675	1.09276	1.08105	1.57053	1.08974	1.23287	-0.128846	0.69922	1.73807	1.42431	0.570205	3.4703	2.68264	-1.8674	-0.966134	0.189186	0.011734	0.472172	0.691664	0.239793	0.120362	0.527374	0.047804	0.0247729	0.686889
MA0465.1_CDX2	2.19138	2.13291	2.44759	-3.11428	-1.37468	-3.64636	-2.20656	-0.836715	-1.1957	-0.39173	-0.174563	0.516379	0.460954	-0.18407	0.00474353	2.39778	-1.4095	-2.17426	3.39459	7.40486	0.92803	-0.32356	-6.26854	0.0169869	0.195146	0.0554327	0.759247	0.868184	0.530522	0.254602	0.701957	0.337746
MA0468.1_DUX4	-4.17408	-2.59423	-2.30285	0.417344	0.452189	-1.53318	1.32313	1.22961	0.933405	1.68784	1.3919	0.923932	0.751361	0.884114	0.349204	1.67111	-2.35634	0.381075	1.42971	4.43235	-1.24408	-2.46162	-0.784966	0.0336664	0.165888	0.541475	0.0764831	0.705484	0.424265	0.0824626	0.0110774	0.138824
MA0470.1_E2F4	5.05738	6.38322	5.08267	-1.20369	4.88016	5.59679	-4.11053	-2.59176	-3.18537	-2.66316	-3.31762	-3.54768	-1.40633	-0.0843923	-1.36708	-1.5615	-3.5124	-2.11489	-0.115086	-1.59239	-2.02743	-3.22221	0.0718086	0.379296	0.0921128	0.830025	0.0180576	0.32267	0.397347	0.71435	0.000891277	0.00122448
MA0471.1_E2F6	-2.18121	-0.683365	-2.85483	1.29481	0.462896	-2.58671	5.54382	3.94546	1.68577	3.30401	4.32476	0.985207	-1.7484	-0.590747	1.61033	-2.38278	-4.18132	-2.17651	-4.14508	4.82218	-1.00805	-0.966103	1.19134	0.309461	0.0698298	0.598476	0.0893966	0.112909	0.418919	0.939269	0.00124793	0.00138321
MA0476.1_FOS	-6.03892	-5.42056	-5.4806	-0.598692	-0.961915	-1.03274	-0.511889	1.57138	0.491803	1.26057	2.31011	0.608777	1.91161	1.68232	0.390145	1.44682	1.52343	1.84236	4.46249	4.67372	1.07269	-1.05024	-0.73699	9.11999e-05	0.142682	0.326018	0.928886	0.771981	0.13934	0.0297854	0.00940801	0.378063
MA0477.1_FOSL1	-5.59195	-4.8466	-6.16702	-0.113305	0.425332	-1.32653	-1.62589	1.83772	0.234756	0.809512	0.845486	0.357196	1.04895	2.7696	0.442668	0.880005	1.53227	2.48601	5.41932	3.57557	0.444291	-0.347701	-0.876907	0.00180801	0.694792	0.655601	0.395348	0.800518	0.0793863	0.0262231	0.0376779	0.129101
MA0478.1_FOSL2	-5.57432	-5.17887	-6.53155	-0.193093	0.520996	-1.59739	-0.910682	0.665785	-0.301991	1.28474	0.398262	0.234781	1.88971	3.41718	0.238197	1.34416	2.13198	2.5747	6.08715	3.66818	0.527197	-0.196172	-2.40746	0.00350322	0.772257	0.2257	0.318392	0.919965	0.139514	0.0253813	0.0431396	0.0623366
MA0479.1_FOXH1	-4.05476	-4.24233	-5.25747	4.24631	-0.0806326	-0.00576977	3.83871	0.401071	0.235943	2.3916	3.74245	1.79458	0.166624	0.505949	-0.108568	0.598466	-2.17843	3.16598	0.248497	6.41609	-2.91612	-1.41002	-0.895284	0.0462368	0.957458	0.445522	0.0410457	0.608727	0.170386	0.093872	0.0595311	0.105052
MA0481.1_FOXP1	0.516134	1.98453	1.2385	-0.198092	0.531826	-0.143402	-1.13108	0.378083	-0.415781	0.436808	1.48844	0.086138	-0.416845	-0.426815	1.7513	-0.988663	-4.90955	-1.62678	0.391479	5.83062	-1.53332	-1.81058	-2.10339	0.0890791	0.426192	0.155341	0.688485	0.322287	0.232351	0.271316	0.324664	0.4621
MA0484.1_HNF4G	-0.459393	-0.747063	0.122433	-2.49264	-0.460193	-2.20445	-1.3046	0.954388	0.373581	0.467282	1.14882	-0.528321	0.490671	0.604864	-2.23434	2.01736	-2.73136	-0.884404	2.7363	6.00433	-0.203757	2.02476	-1.06688	0.154244	0.136672	0.694567	0.529504	0.994079	0.42572	0.36382	0.0595388	0.61958
MA0488.1_JUN	-1.75247	0.604133	-1.79236	1.09507	1.0323	0.250508	-0.844802	-1.1553	-0.379127	-1.22402	1.26641	0.954509	-1.77459	-0.89803	1.17161	-2.59552	-2.33565	1.21911	1.02739	4.04256	-2.83806	-0.0701524	4.09672	0.144033	0.0117592	0.284957	0.517515	0.150653	0.0406639	0.504785	0.84992	0.712856
MA0489.1_JUN(var.2)	-4.85445	-5.06642	-4.72517	-0.671272	-0.749443	-2.24914	0.569776	0.615069	-0.206344	0.797645	1.82455	0.735364	1.57248	2.21422	1.60782	0.557099	1.4941	1.91771	3.6461	3.745	-0.291438	-0.2782	-1.00131	0.0163098	0.0750114	0.152915	0.189467	0.317844	0.0717831	0.0153384	0.00553886	0.238452
MA0490.1_JUNB	-5.73902	-4.78613	-5.6167	0.156581	0.015701	-0.791338	0.354763	1.59397	0.598629	0.733558	1.24103	-0.192153	1.80587	2.30207	0.375292	0.547995	1.76952	1.55068	3.9637	4.00362	-0.0636713	-0.10933	-1.68514	0.000250803	0.0970518	0.675611	0.281852	0.72057	0.141908	0.0229681	0.0292681	0.327342
MA0491.1_JUND	-5.32864	-5.7904	-6.39941	0.212942	-0.170598	-0.669315	-0.434456	1.18333	0.289291	0.767026	1.30136	1.09312	2.17904	2.71683	0.703083	1.36389	1.61321	1.60487	4.29372	2.59335	0.379686	-1.09771	-0.730878	0.000188167	0.372165	0.266138	0.30813	0.597208	0.227538	0.0319865	0.0319045	0.206648
MA0492.1_JUND(var.2)	-1.23655	0.289292	-2.24515	1.40944	0.438382	0.564238	0.251313	0.236044	1.36233	-0.00316598	2.83653	0.441965	-2.03	-1.1113	1.27117	-2.46816	-3.81152	-0.117743	-0.568941	3.64269	-3.82912	-0.278221	5.58392	0.111851	0.717721	0.657289	0.264743	0.125148	0.0762745	0.882245	0.19396	0.247531
MA0495.1_MAFF	-1.30369	-1.01919	-3.75197	-0.409518	-0.327461	-1.18288	-1.17374	-1.92579	-2.2546	-0.451725	0.707109	-0.365353	2.07075	1.93687	1.70347	1.04685	1.20237	1.15924	4.02645	4.40227	0.638671	-0.310134	-4.27052	0.247047	0.0542084	0.02452	0.0273661	0.0098347	0.179792	0.0766951	0.549142	0.0197514
MA0496.1_MAFK	-3.1894	-2.00396	-4.42514	-0.328758	-0.55893	-1.57667	-1.29373	-1.48194	-2.45898	-0.284656	1.22975	0.836298	1.39775	1.61004	1.84541	1.17957	1.47651	1.84158	5.1509	4.8333	1.69307	-0.290237	-3.92472	0.0556285	0.1547	0.017297	0.144226	0.258763	0.128746	0.0816916	0.128508	0.0390481
MA0497.1_MEF2C	2.06572	2.78476	2.34144	0.527666	0.820322	0.624155	0.282174	0.53452	0.611813	-0.427833	0.893532	-1.0498	-3.42524	-0.547238	-0.79997	-1.62358	-3.62577	-3.73227	-0.771347	6.35303	-2.12337	-1.13303	-2.60433	0.00692582	0.241951	0.362096	0.279536	0.512075	0.396209	0.481793	0.021438	0.138472
MA0501.1_MAF::NFE2	-3.42638	-2.35483	-3.05802	0.0174834	1.38921	0.961352	1.38404	-2.01492	-1.09265	-1.40773	1.30557	-0.567298	2.22971	0.16631	-1.42228	1.32816	2.72958	2.0711	4.70223	5.30936	-2.55382	-0.589291	-1.6143	0.00237237	0.311843	0.800017	0.70239	0.271929	0.198792	0.0141506	0.531932	0.138226
MA0502.1_NFYB	-2.32719	-2.15575	-0.923188	0.818358	-1.03995	-2.32247	2.03487	1.6424	1.49102	0.47841	1.60639	1.93908	-0.0999967	-0.904445	2.64636	1.33819	-3.35326	-1.40873	-1.09083	6.44712	-0.638235	-1.19587	-1.23709	0.418267	0.101861	0.486998	0.549272	0.628105	0.554777	0.458484	0.00127513	0.0972578
MA0504.1_NR2C2	-3.16832	-1.09557	-2.13702	-0.793201	-1.85791	-0.947745	1.16189	-2.01947	-2.17113	-0.644616	1.36447	1.84148	1.87228	1.4066	0.699903	2.15173	0.85708	-0.0419432	3.81988	3.63124	-0.532786	2.04275	-3.38727	0.262265	0.880373	0.240735	0.61387	0.835606	0.546848	0.201666	0.0895568	0.224045
MA0506.1_NRF1	5.87043	6.39306	4.53623	-1.58492	7.40257	6.73664	-2.87922	-4.37889	-5.44689	-2.12643	-5.18773	-1.93808	-4.19733	-0.79378	-4.2808	-2.01643	-2.30709	0.734758	4.90114	3.49353	-4.03728	-3.44849	-3.71793	0.675277	0.0922506	0.427877	0.996848	0.504337	0.0492919	0.0290977	0.000689337	0.0717861
MA0507.1_POU2F2	-3.66294	-2.71219	-4.4026	0.118064	-0.318072	1.55927	1.19445	0.749221	-0.426402	0.875212	2.05326	3.10368	-2.76987	0.170885	-0.137952	0.631318	-2.41033	0.463523	1.40469	7.99888	-1.75259	-1.09322	-1.24137	0.00604541	0.947137	0.140436	0.0690869	0.991093	0.23524	0.187947	0.0330659	0.276664
MA0508.1_PRDM1	-2.08956	-1.02954	-0.790057	0.758126	-1.07777	-1.40084	-0.203595	1.16713	0.509019	-0.281216	2.54341	0.470548	0.0935416	-1.56885	-0.677591	0.445333	-0.0247926	-0.527458	-0.285963	3.44463	-0.800282	0.815819	0.838799	0.414716	0.259587	0.68462	0.187373	0.189132	0.657884	0.702866	0.0175402	0.369277
MA0513.1_SMAD2::SMAD3::SMAD4	-5.25001	-5.03966	-2.82527	-0.819013	0.411084	-2.57176	-1.26342	1.66615	2.04315	-0.335036	2.45796	0.9317	0.844954	1.40173	1.10017	0.319666	0.845301	1.70032	3.34685	5.8521	-0.832183	1.02997	0.643594	0.0444397	0.255708	0.885774	0.915918	0.241983	0.121678	0.0913068	0.00993988	0.494542
MA0516.1_SP2	0.565043	4.68161	0.644779	1.41965	-1.5854	0.599721	1.43614	4.40092	2.1479	3.19875	2.63789	0.882991	-2.5713	-1.11968	2.61685	-1.83346	-5.92671	-2.70919	-6.05743	2.03148	-3.846	-2.06015	0.36977	0.335349	0.117702	0.72976	0.229866	0.296795	0.637307	0.889499	0.190758	0.000557585
MA0517.1_STAT1::STAT2	-0.515748	-0.40969	0.818618	-0.867269	-0.402083	-0.915816	-0.454295	0.0398735	-0.990819	-0.137259	-0.0308275	1.59706	-0.443245	0.0532262	0.116192	0.642082	-0.669372	-0.892653	-0.277174	3.41406	1.16184	1.38503	-1.34572	0.242347	0.497983	0.23245	0.421814	0.925662	0.648636	0.840693	0.400277	0.60682
MA0523.1_TCF7L2	-2.50283	-3.16205	-1.91067	0.957788	-1.2649	-0.293869	-0.296282	1.03931	0.0693343	1.30904	1.01291	0.423516	1.24203	0.0155915	0.499732	-0.192215	-3.26848	-0.593634	2.28128	4.88819	0.627206	0.741602	-0.466662	0.047978	0.573548	0.257803	0.500719	0.363529	0.183136	0.354622	0.0231463	0.919027
MA0526.1_USF2	2.46871	7.86913	3.29148	1.01254	3.91841	3.19347	-1.20012	-2.5721	-0.966294	-0.986185	-1.35333	-1.66097	-3.13683	-1.74492	-1.57004	-3.58043	-3.33897	-0.365235	0.304364	0.421339	-5.61569	-4.37594	2.21712	0.403782	0.0210017	0.682756	0.235865	0.111537	0.0014363	0.380644	0.00231873	0.576774
MA0527.1_ZBTB33	0.414378	0.83309	0.187604	-0.270311	0.15956	0.936008	0.0582264	-0.247026	0.227111	0.0205085	0.090573	-1.25578	-0.598125	-0.0690717	-0.224077	-2.12996	-3.41368	-0.262981	-0.303822	3.95304	-2.2095	-0.302415	2.38973	0.646044	0.54575	0.467559	0.869483	0.144655	0.0965383	0.579745	0.082725	0.877162
MA0528.1_ZNF263	-3.1044	-2.99629	-2.82564	4.05143	-1.3867	-2.72723	3.08695	5.25521	4.51877	2.1398	5.38923	1.54078	-2.43401	-1.99906	1.91357	-0.690301	-5.54017	-5.24055	-6.04998	4.91192	-0.371068	0.984792	3.78119	0.289986	0.164836	0.418628	0.103505	0.514927	0.832126	0.420359	0.00444217	0.0029896
MA0102.3_CEBPA	-1.46823	-0.726017	-2.03472	-0.121458	0.177822	1.46214	-1.45528	-0.494615	-1.09447	-0.538749	0.305487	-0.3912	0.284911	-0.00716828	-0.177785	-0.878013	0.259391	2.53853	4.15182	6.2495	-0.531834	-1.04386	-1.8985	0.0387826	0.0680865	0.102961	0.470597	0.654164	0.035284	0.0252088	0.785947	0.0953486
MA0162.2_EGR1	2.15764	6.17829	1.1673	0.591757	-0.358678	0.07298	1.5339	3.03596	1.15241	3.3492	3.00033	0.539355	-2.52661	-1.81334	1.13185	-1.9597	-8.3975	-2.09814	-4.78354	4.81515	-3.4273	-1.85842	-0.932603	0.179975	0.0695582	0.733925	0.0812454	0.408583	0.38915	0.680455	0.680299	0.00241806
MA0076.2_ELK4	0.253323	2.23698	0.839693	-2.38579	2.21535	2.67161	-2.22836	-2.04315	-1.77112	-3.4129	-0.361776	-0.259047	1.80384	1.54128	-0.968495	0.637146	-0.988066	1.161	3.85759	1.11434	-0.968525	-1.91101	-2.69054	0.8843	0.219261	0.584806	0.193109	0.48292	0.170983	0.0307403	0.01868	0.023561
MA0258.2_ESR2	-4.87857	-3.00626	-3.53607	1.19068	-1.01679	-4.20587	1.47751	1.12234	-0.773031	0.70555	1.94664	1.9149	1.02108	3.45695	2.66669	3.53439	-0.712636	-0.643724	2.338	3.56352	-0.14902	1.29561	-1.19026	0.252326	0.34381	0.335915	0.370724	0.728502	0.90426	0.302989	0.00899344	0.65663
MA0148.3_FOXA1	-3.78938	-3.07843	-3.28649	2.12482	1.80715	0.263535	0.571337	1.47091	1.05526	0.87761	2.47694	1.51375	0.203539	-0.284023	0.573869	0.223248	-1.6418	0.11321	1.26782	8.83011	-1.79352	-2.40569	-0.838409	0.00781037	0.605399	0.345384	0.0683241	0.515712	0.269458	0.201374	0.0906542	0.341158
MA0036.2_GATA2	-1.52454	-1.52256	-1.37419	0.457913	0.474511	0.774647	1.64935	-0.398963	0.334918	2.49475	1.41411	-0.441403	-1.21662	0.680465	0.241173	-0.015767	-0.760514	0.76074	0.669795	4.23416	-2.14777	-1.68083	-1.48713	0.00047845	0.95254	0.58454	0.299787	0.700349	0.185231	0.0853835	0.0825095	0.229283
MA0037.2_GATA3	-1.44353	-1.20655	-1.83931	-0.636425	-0.497789	0.959304	1.22095	0.131826	0.250616	1.7656	2.48379	1.41405	-1.3912	0.176405	1.49597	1.60118	-1.30647	-0.301682	0.193814	2.46705	-1.2564	-1.28075	-1.26051	0.0927571	0.39739	0.0446521	0.153403	0.977866	0.746471	0.137738	0.00455632	0.0362859
MA0050.2_IRF1	0.081939	-0.45692	0.832129	0.052543	-1.31664	-1.80329	0.993663	1.06518	0.2327	0.9051	2.02248	1.78108	0.398902	-0.719151	0.589234	-0.190778	-3.47094	-4.0168	-1.24813	4.19009	-0.179828	0.652712	-0.258906	0.164282	0.0658798	0.139292	0.0512791	0.442539	0.648316	0.875448	0.0089441	0.0468594
MA0060.2_NFYA	-3.50792	-2.43326	-2.68852	2.09728	-1.93442	-1.32817	1.45287	0.184205	-0.922002	1.03406	3.81487	3.74637	0.0397154	-0.046374	2.8576	1.57646	-3.46076	1.30928	-0.0498421	6.14021	-1.37453	-1.47367	-1.34251	0.179794	0.690016	0.0885689	0.221296	0.586986	0.386811	0.175918	0.0174068	0.305541
MA0014.2_PAX5	-3.83404	-2.79051	-2.53566	-0.135232	0.117623	-0.481715	1.66139	-0.192256	-1.21882	-1.89451	1.14728	0.138822	1.88873	1.19969	-1.1165	2.07245	1.75938	1.59472	3.34821	3.60412	0.0948204	0.00356207	-0.296011	0.0091289	0.796953	0.827312	0.537012	0.299319	0.27542	0.0398727	0.106976	0.0849518
MA0079.3_SP1	0.196707	4.22057	0.113622	1.061	-0.585217	0.0914721	1.73624	4.31791	2.32981	3.76403	2.2486	1.19359	-1.99146	-0.826545	2.92613	-1.96831	-5.41701	-3.42778	-5.03502	3.13839	-3.56305	-1.65147	-0.661228	0.438064	0.058063	0.734613	0.25088	0.222852	0.572577	0.949785	0.0731221	0.000567974
MA0137.3_STAT1	-2.5208	-0.174645	-0.544705	-0.879285	0.797664	1.6258	-0.479146	-2.0483	1.21263	-0.966817	-0.181576	1.20587	0.425663	0.486873	-1.80832	0.909138	-0.506138	-0.421288	4.03211	1.88905	0.861655	0.0348598	-2.45139	0.198566	0.472451	0.71045	0.764001	0.664452	0.350647	0.225978	0.927319	0.490523
MA0144.2_STAT3	1.1957	2.88564	2.219	-2.78944	1.06665	1.79885	-4.09512	-2.99132	-2.34098	-1.81798	-2.39971	-1.68092	1.41684	2.20399	-3.36515	1.69751	0.608325	-0.108932	6.78228	0.39973	2.15227	0.584315	-4.58733	0.279741	0.144792	0.134736	0.359495	0.609229	0.645514	0.379393	0.00507049	0.00501708
MA0140.2_GATA1::TAL1	-7.54999	-5.6187	-4.75736	1.11027	0.994004	-0.139242	1.66664	-0.933212	-0.103707	-0.336444	0.478143	2.4476	1.26038	1.5077	2.11029	2.43161	0.707573	2.65959	4.15593	5.2953	-2.88731	-0.182391	-1.0678	0.00621432	0.641958	0.593531	0.457556	0.958786	0.142217	0.0080188	0.0956186	0.309692
MA0093.2_USF1	3.85718	9.48261	4.03691	1.96683	4.09606	3.95753	-1.13297	-3.28213	-1.1817	-1.42048	-2.29157	-2.58916	-4.42689	-2.1041	-2.76236	-4.50202	-3.98979	-0.694255	0.173119	-0.327993	-5.66027	-3.7822	2.86028	0.31555	0.0062177	0.786267	0.289391	0.234995	0.00281078	0.53716	0.000896413	0.721069
MA0095.2_YY1	9.64934	15.8109	10.2944	-2.21399	3.26297	3.59652	-5.70835	-4.78312	-6.16185	-3.16665	-5.06654	-4.34297	0.0897853	0.728297	-2.41557	-1.21369	-2.97001	-3.25595	3.87434	1.35463	-2.70104	-2.09031	-5.20499	0.0188363	0.0579486	0.125181	0.0415193	0.321822	0.323184	0.187036	0.00635946	0.00104534
MA0103.2_ZEB1	-7.17696	-5.92855	-6.84359	1.28911	-1.39499	-1.31017	1.22418	1.30798	0.508282	3.01338	2.37182	3.36394	0.989566	1.93332	2.33237	2.29326	-0.814604	2.31648	2.67702	7.66684	-0.844791	-1.83318	-1.88571	0.0103544	0.228852	0.0082222	0.0834534	0.631244	0.236077	0.0746672	0.010816	0.524278
MA0593.1_FOXP2	-3.92073	-1.00518	-3.6314	3.28086	1.78386	1.87555	0.440716	0.913878	0.515666	1.15609	1.52789	1.01133	-0.909683	-0.968997	0.753141	-1.0851	-3.69315	1.116	0.575676	6.3178	-2.90142	-3.19257	0.798995	0.0157375	0.0627421	0.0460213	0.0954387	0.339932	0.109859	0.126537	0.38334	0.181724
MA0595.1_SREBF1	-2.94165	-0.491847	-2.11387	0.245867	1.10179	-0.529704	0.528982	1.13384	0.183325	3.52987	2.03409	-0.535744	-0.86707	0.563032	-0.269591	-1.1626	-2.73989	1.51795	1.11088	4.00472	-2.92167	-1.06763	0.431967	0.0792549	0.572292	0.468165	0.252209	0.220618	0.0431521	0.0628364	0.0466825	0.154242
MA0596.1_SREBF2	-4.97707	-4.05955	-5.17084	0.584363	-0.904164	-2.9038	0.181078	1.2552	0.780239	1.45675	4.01632	-0.505555	-0.447766	1.44896	1.40442	2.10925	0.253085	2.42218	4.17495	5.17651	-0.175916	-0.394033	-1.14819	0.0561619	0.208306	0.559592	0.599234	0.768148	0.134016	0.0204539	0.00607276	0.866832
MA0597.1_THAP1	-5.1169	-3.87932	-3.42923	0.688625	-0.586348	-2.51217	-0.513183	0.115416	-1.26816	0.0281749	1.10404	-0.973672	1.62622	1.75749	1.02258	2.16901	3.18058	1.5259	5.16926	6.44126	1.87224	-2.48776	-1.56694	0.0492217	0.823868	0.452949	0.129617	0.211909	0.370311	0.0622554	0.0546896	0.0250462
MA0599.1_KLF5	7.30913	14.1593	6.77347	-1.29102	5.01598	3.28901	-2.73898	-1.27703	-2.75022	-0.372751	-2.87714	-2.69008	-3.72141	-0.145406	-2.72788	-1.93724	-5.17133	-2.66484	-2.17027	2.99547	-5.20684	-3.84857	-4.507	0.0833969	0.126947	0.787516	0.878705	0.560278	0.316609	0.158312	0.0113716	0.539547
MA0610.1_DMRT3	-7.51565	-7.36672	-6.14182	2.23207	-0.602609	-0.680791	2.08799	1.70779	2.02668	2.12239	3.91916	3.7194	1.62436	-0.77344	3.82382	1.18725	-2.71766	1.51543	1.50312	5.34612	0.186622	-0.800263	-3.51027	0.00765756	0.230787	0.142115	0.333195	0.431935	0.275554	0.0708065	0.0164839	0.0457347
MA0612.1_EMX1	0.0513566	3.66381	1.19165	2.98684	1.44647	0.701664	-0.462556	1.01994	0.1805	0.255814	0.943533	-0.739566	-1.64131	-0.6633	-0.506663	-2.53918	-4.60952	-0.325279	0.799312	6.08749	-2.96044	-3.01372	-2.20627	0.955297	0.152777	0.893649	0.152118	0.209706	0.0868525	0.128491	0.0509231	0.188277
MA0613.1_FOXG1	-5.42096	-1.5917	-5.04395	3.17197	1.43899	1.2	1.61276	0.244669	0.0349325	0.409371	2.23123	2.31753	-1.13318	-0.100864	1.08183	0.110451	-3.7493	1.88779	1.7488	7.22642	-2.70817	-2.75999	-0.959998	0.0227745	0.178953	0.271201	0.12901	0.521554	0.147824	0.0735058	0.203795	0.299454
MA0618.1_LBX1	2.40517	4.18237	1.80533	2.11887	2.8096	5.94273	1.27079	-1.82363	-0.527606	-1.02554	-0.740557	-1.92862	-2.15639	-0.45571	-2.90964	-3.65523	-4.60466	-0.283549	-1.10056	3.04236	-3.53052	-4.76178	-0.277893	0.587067	0.0585899	0.442103	0.507791	0.078083	0.0535524	0.138094	0.000674738	0.220962
MA0625.1_NFATC3	0.596135	0.101847	1.1422	-1.88188	-0.296047	-0.877812	-1.77621	-1.51087	-1.80717	-1.51399	-1.98279	-0.42335	0.499009	1.70332	0.305775	2.46036	1.72233	-0.333703	4.30727	3.18744	0.772783	0.467961	-4.12305	0.0505453	0.27811	0.48792	0.0282037	0.118558	0.854919	0.18929	0.0324043	0.00371236
MA0628.1_POU6F1	0.425129	4.6566	0.863038	1.0818	1.24712	0.656646	-0.53635	-0.131705	0.441355	-0.608893	0.325787	-0.929705	-1.32633	-0.665717	-0.516626	-1.45614	-2.38762	-0.600822	0.700037	4.24263	-2.80987	-2.7145	-1.92106	0.540115	0.0421534	0.526809	0.400436	0.208155	0.136244	0.108123	0.0433851	0.353332
MA0630.1_SHOX	2.57406	5.09648	2.0746	0.0967113	2.10094	2.90674	-0.717109	-2.09792	-2.19862	-0.992578	-1.16014	0.0590537	-2.15176	-0.518686	-2.15511	0.509465	-2.20852	-0.294036	1.4999	2.16415	-3.46568	-2.21268	-3.81327	0.285684	0.0358501	0.190157	0.25059	0.677194	0.355831	0.0117029	0.0013701	0.960229
MA0634.1_ALX3	0.694902	3.03896	0.019464	-0.367274	1.35623	2.40958	-1.3014	-2.00202	-1.70097	-1.41363	0.487064	0.302058	0.932573	-0.732865	-0.156814	-0.0453278	-0.566441	-1.17769	2.97438	2.80558	-2.53288	-2.64771	-2.15593	0.927596	0.0665544	0.126095	0.789601	0.6056	0.306811	0.097518	0.0129237	0.392106
MA0635.1_BARHL2	-1.75582	-1.77202	-3.02572	-0.390436	-3.12474	-1.74817	0.120344	0.249996	-0.520784	0.788268	2.11709	2.94587	-0.166225	0.335269	1.58739	1.16014	1.43376	0.8438	3.55218	2.11758	0.0578792	0.722262	-1.44047	0.663006	0.154819	0.071498	0.172358	0.304552	0.380168	0.0796805	0.00180573	0.973703
MA0636.1_BHLHE41	8.34468	12.254	7.15215	1.9438	5.97171	8.14295	-2.50049	-3.50889	-2.03521	-3.03073	-3.25637	-3.06951	-7.9547	-3.8389	-3.95949	-5.3458	-4.91735	-1.77378	-2.39731	-2.37838	-6.38577	-4.22547	3.75763	0.178973	0.0411061	0.421011	0.255372	0.938088	0.00396272	0.976795	0.000601394	0.483618
MA0637.1_CENPB	1.46564	2.07955	1.84878	-3.38714	2.68003	0.887314	-0.61799	-3.25455	-1.94242	-0.80402	-1.67409	-2.89142	0.217033	1.48101	-0.349251	-0.728859	-1.01166	-0.398992	1.44347	1.43179	0.523541	0.158701	-1.32218	0.436277	0.389361	0.886401	0.0516421	0.127527	0.10292	0.280674	0.0256527	0.00384148
MA0638.1_CREB3	-0.851539	3.10233	0.325909	-0.537709	0.935423	2.69134	-0.609861	-2.90445	-1.8634	-0.27464	-0.854141	-1.60901	-0.830629	-0.546881	-0.627018	-1.98884	-0.325231	1.16784	2.99251	1.14374	-1.24882	0.390617	0.900159	0.915001	0.0761605	0.329714	0.59465	0.661567	0.101181	0.120814	0.018226	0.0254873
MA0639.1_DBP	-1.77228	-0.0521711	-1.54139	0.395485	-0.817936	1.4162	-1.01022	-0.448737	-0.315	-0.593492	1.70654	0.742052	0.265293	-1.19131	0.777822	-1.00451	-1.20762	1.03403	0.785885	3.87878	-1.29018	-1.55114	2.03455	0.161403	0.287107	0.204614	0.495498	0.212546	0.0923865	0.228888	0.541892	0.746939
MA0154.3_EBF1	-2.79496	-0.777742	-1.08923	-0.753868	-0.422306	-3.31358	0.419896	-0.671063	0.895326	2.15694	0.939186	1.46916	1.72433	-0.0308572	1.48516	-0.287992	0.467297	-0.862925	1.96008	2.33321	0.417049	0.876029	-2.38939	0.961474	0.194455	0.0930277	0.524366	0.241846	0.412879	0.35241	0.00389459	0.550093
MA0598.2_EHF	-0.448206	1.64075	0.932713	-1.38398	3.20583	2.32612	-2.56638	-2.74743	-2.30222	-2.10815	-0.382786	-0.630159	0.884395	1.96309	-0.112991	2.7121	0.359206	0.343427	2.64261	0.41993	-0.751191	-1.67761	-2.69605	0.692736	0.106952	0.10136	0.0733365	0.694911	0.803562	0.0431729	0.00822442	0.00513882
MA0640.1_ELF3	-2.61048	1.22007	-0.740769	-0.298611	2.82435	2.82618	-1.94743	-2.44669	-2.62217	-1.60716	0.724785	-0.0528167	0.913804	1.8634	0.279087	1.15539	1.09962	1.04633	4.28549	0.482975	-2.04502	-1.2774	-2.56497	0.176163	0.0535717	0.0876643	0.192465	0.835405	0.564474	0.0698772	0.109024	0.0412909
MA0641.1_ELF4	0.833021	2.73983	1.34379	-1.44478	3.83239	4.29979	-2.86273	-3.39006	-2.76764	-3.246	-1.66966	-0.0592831	-0.179958	2.29927	-0.0788621	0.952589	-0.273181	0.321306	2.47982	-0.547357	-1.64241	-1.07727	-2.43494	0.784259	0.103097	0.278312	0.130222	0.759667	0.730629	0.0946583	0.00286309	0.00556762
MA0136.2_ELF5	-1.22143	0.820885	-0.107448	-2.50564	2.75534	1.98867	-1.00784	-1.59233	-2.68511	-1.55721	-0.847983	0.195946	1.14592	1.07766	-1.03701	1.69298	-0.683869	0.481057	4.33921	2.34624	-0.413532	-1.39035	-2.07467	0.64239	0.262535	0.221057	0.274196	0.945439	0.34429	0.063602	0.128544	0.022486
MA0027.2_EN1	1.751	3.64166	1.56296	3.21122	3.29254	6.56449	1.8775	-1.0644	-0.970424	-0.852179	-0.160227	-1.25343	-1.96443	-0.755818	-2.89687	-4.4428	-5.21447	-0.822681	-1.96958	3.16651	-4.13788	-5.07503	-0.0681777	0.20429	0.0406437	0.549518	0.207665	0.0277987	0.0788282	0.215157	0.0023262	0.0654478
MA0642.1_EN2	-0.236383	-0.15482	1.94115	3.02774	4.21171	4.58086	0.385045	-0.804497	-0.243511	-0.0789267	1.03042	-0.10615	-0.195179	-0.454736	-1.45001	-2.15972	-1.5769	1.1069	-1.68471	2.10262	-5.14568	-3.63494	-2.85961	0.0212054	0.00277676	0.378858	0.14054	0.0937804	0.164876	0.0397097	0.0497269	0.0466224
MA0644.1_ESX1	3.25541	4.97339	2.35509	1.07545	2.56975	4.35586	0.0518473	-3.0294	-1.69308	-0.26473	-1.09188	-1.40803	-2.33809	-1.03142	-1.65003	-0.820213	-2.57112	0.70126	0.68967	3.05128	-3.77244	-2.54679	-3.50596	0.520961	0.0317116	0.560619	0.214172	0.984123	0.0914172	0.0136317	0.000186964	0.984897
MA0645.1_ETV6	-0.847431	0.0662598	-0.789473	-2.45431	2.06408	0.0493741	-2.55368	-1.06504	-1.71263	-1.48305	-0.935719	-0.830546	2.34299	3.41115	-0.0477443	0.538969	0.744373	1.2342	4.39247	1.08688	-0.103682	-2.04414	-1.40031	0.786157	0.331142	0.245807	0.0948247	0.342717	0.276355	0.0666264	0.137612	0.00251301
MA0475.2_FLI1	4.36514	6.92179	4.42929	-2.9328	4.64699	5.49297	-4.04907	-2.69587	-3.77207	-2.78897	-1.6627	-1.04179	-0.190018	-1.06372	-1.86081	-1.65505	-2.44447	-0.0914085	0.923024	1.05704	-1.95745	-2.79397	-1.83964	0.403515	0.155304	0.0661526	0.322626	0.204951	0.0233149	0.00431675	0.00448996	0.0258304
MA0042.2_FOXI1	-6.15911	-3.5613	-5.0437	3.57088	0.981817	1.41338	-0.867786	0.334198	0.591734	1.6732	1.61174	4.14173	-0.171917	1.28454	0.0146999	-0.582441	-2.42316	3.80741	2.42009	5.87543	-2.45367	-1.20893	-0.150425	0.00330929	0.117152	0.0788157	0.111187	0.248319	0.0303979	0.0158969	0.169163	0.533736
MA0033.2_FOXL1	-5.41757	-3.08679	-5.66395	3.46722	0.858027	0.843757	3.35274	1.44532	1.11105	1.74041	3.4158	2.45803	-0.980727	-0.428984	1.55972	0.819244	-3.97946	2.55143	1.62715	7.50826	-2.74441	-4.45546	-0.393868	0.00582338	0.836533	0.544604	0.0633152	0.618528	0.202925	0.0506717	0.0585028	0.0700574
MA0157.2_FOXO3	-3.63335	-0.909798	-3.08258	2.51797	0.943192	1.31882	-1.52629	-0.437998	-0.329347	-0.0898316	0.819671	2.91539	-0.187603	-0.198952	0.761267	-1.25442	-1.64828	2.17537	2.31189	4.06988	-1.5286	-2.10432	-0.0990464	0.0203013	0.0195958	0.143061	0.346825	0.0251381	0.0133381	0.00864225	0.573123	0.984933
MA0646.1_GCM1	-8.18598	-6.77973	-6.81414	0.498176	-0.641461	-3.82939	1.42368	-0.011674	2.02695	2.99082	5.24505	2.39324	2.88989	2.3278	1.79712	2.41633	1.64946	0.194536	4.54385	5.02014	0.71584	-0.849128	-3.3931	0.0327965	0.187724	0.0942233	0.298587	0.594179	0.513776	0.0892628	0.00436319	0.460468
MA0647.1_GRHL1	-1.36716	-0.7718	-1.64669	0.255535	0.590229	-2.17866	-0.406631	0.569589	1.06427	1.15167	1.85691	0.906513	-0.542841	0.202017	1.87831	-0.362884	-1.36493	-0.820259	0.128595	3.86764	-1.25122	0.952962	-1.70332	0.451388	0.446804	0.16951	0.389206	0.21332	0.312012	0.368208	0.0117695	0.206345
MA0648.1_GSC	-2.5926	-2.93558	-2.17634	2.39772	-0.375079	-1.42174	0.917293	0.375858	-0.218085	-0.509274	3.38223	3.10967	1.23877	0.996338	0.82519	-0.263187	-0.82341	-0.0236253	1.67426	1.90706	0.871295	-0.530381	-2.01297	0.131088	0.904605	0.321028	0.519047	0.0733223	0.0910377	0.172802	0.0507115	0.317797
MA0649.1_HEY2	3.74709	8.43269	2.54619	2.61186	4.82759	5.1353	-1.70295	-1.9348	-1.7201	-0.42183	-1.43175	-2.93844	-4.10188	-2.0592	-1.14778	-2.79462	-4.29624	-1.28186	-0.883235	1.37328	-5.18952	-3.42666	0.257669	0.741219	0.0165477	0.821026	0.50345	0.408997	0.0653453	0.25699	0.000477659	0.529134
MA0131.2_HINFP	-0.787769	0.671063	1.08245	0.279124	0.826265	-0.117841	-1.18292	-0.370922	-1.45728	1.26307	-0.609793	-0.203143	0.0281023	0.309026	-1.55919	0.708128	-2.48319	-1.38236	1.58773	3.27548	0.0983915	-0.314584	-1.54308	0.991548	0.0366254	0.171274	0.530878	0.816431	0.418102	0.328834	0.152286	0.628215
MA0043.2_HLF	-1.83547	-0.354763	-1.87651	-0.334939	-0.897759	0.971349	-1.32296	-0.251929	-0.0294822	0.411646	2.01663	0.759049	0.743542	-0.790938	0.207703	-1.11884	-0.582659	1.12353	0.914805	4.01958	-0.84116	-1.45702	1.42632	0.16516	0.551062	0.0667348	0.203262	0.184654	0.0951518	0.159013	0.149871	0.919639
MA0046.2_HNF1A	-0.125893	1.9125	1.10191	-0.578211	-0.0569875	-1.65176	1.65385	0.616394	0.869679	1.01619	2.30468	0.511091	-0.601765	0.405941	-0.342517	-0.262644	-3.18984	-1.527	0.0861097	4.29722	-1.41446	-2.54067	-2.26628	0.0880725	0.0397815	0.732388	0.0936787	0.477996	0.325536	0.220383	0.108271	0.0163424
MA0153.2_HNF1B	-0.123939	1.4036	1.20437	-0.280976	0.595908	-0.405996	1.56952	0.368993	1.12811	-0.0894051	1.44673	0.627173	-1.64876	0.415217	0.375465	-0.311073	-3.59947	-0.936658	0.733638	3.61545	-2.14781	-3.01048	-1.98545	0.219762	0.0901068	0.56003	0.318389	0.485037	0.267623	0.110933	0.312904	0.0312886
MA0650.1_HOXA13	0.893479	1.76377	0.906371	-1.12718	-0.6234	-0.785411	-1.02041	-1.33001	-0.328161	-0.53068	-0.347077	1.29321	0.578426	0.457099	0.828336	1.18251	-1.21876	-1.13811	1.76187	5.53728	-0.327866	-2.36493	-6.22045	0.00822484	0.895165	0.212021	0.494195	0.688391	0.430453	0.125499	0.386984	0.761799
MA0651.1_HOXC11	2.36584	2.39643	2.66764	-2.77887	0.300518	0.807154	-1.91786	-1.7258	-2.34128	-0.981189	-2.22171	-2.31933	0.205485	-0.422756	-2.94595	0.967251	0.511185	-0.499895	2.56837	5.3661	0.938886	0.652309	-1.69517	0.112583	0.327344	0.76545	0.514213	0.199112	0.412829	0.277746	0.0179176	0.00411768
MA0486.2_HSF1	-1.23442	-1.62185	-0.334361	-2.21893	0.654405	-1.43441	-1.46536	-0.809704	-1.02457	-1.24675	-2.27998	0.161996	2.60777	2.0658	2.67481	1.15431	2.42726	0.543609	3.07572	-0.0362273	1.55114	0.511853	-1.21146	0.95034	0.918764	0.978773	0.0299487	0.481377	0.639402	0.507714	0.885071	0.000235002
MA0652.1_IRF8	-2.34667	-1.7683	-2.21225	-0.892982	-1.467	-2.12394	-0.303919	0.409343	1.07687	1.81776	1.68397	0.680489	2.15101	2.86662	1.05932	1.79363	0.225514	-2.0659	1.55272	1.22154	1.33476	0.133056	-1.98162	0.22143	0.0246297	0.136521	0.383968	0.398914	0.61821	0.800772	8.76252e-05	0.811291
MA0653.1_IRF9	-2.56489	-1.8813	-0.832631	-0.667096	-1.05841	-1.13521	0.69379	0.345138	-0.744452	0.283812	1.0962	1.24844	3.28969	1.14424	1.62248	0.985366	0.0252285	-2.16745	3.60081	1.49306	-0.753876	-0.393302	-1.39307	0.246602	0.124684	0.222155	0.214724	0.158017	0.810566	0.392833	0.00127291	0.764263
MA0654.1_ISX	2.40517	4.18237	1.80533	2.11887	2.8096	5.94273	1.27079	-1.82363	-0.527606	-1.02554	-0.740557	-1.92862	-2.15639	-0.45571	-2.90964	-3.65523	-4.60466	-0.283549	-1.10056	3.04236	-3.53052	-4.76178	-0.277893	0.587067	0.0585899	0.442103	0.507791	0.078083	0.0535524	0.138094	0.000674738	0.220962
MA0655.1_JDP2	-4.77111	-4.44867	-4.86172	1.16146	0.863861	0.0780856	1.55821	0.522957	0.00621374	1.31069	0.264368	-0.522964	1.2321	0.651202	-0.00341418	1.27032	0.917361	1.03637	1.6049	3.55312	0.17211	-0.121776	0.0703605	0.00125448	0.992882	0.648489	0.691502	0.331641	0.330132	0.115478	0.0946302	0.367708
MA0656.1_JDP2(var.2)	1.11029	3.57746	0.106446	1.47862	3.63598	3.49047	-2.45274	0.0338842	0.245501	-2.93339	0.118693	-2.10227	-3.36732	-1.75612	0.0321417	-4.32769	-3.48381	1.07755	-0.49857	2.17954	-3.34866	-1.16166	4.14329	0.372418	0.0340372	0.507325	0.967484	0.143424	0.0137238	0.69399	0.00274923	0.824541
MA0657.1_KLF13	9.75619	17.2757	11.2625	-1.22141	5.92824	6.49244	-5.81326	-3.25094	-3.68134	-2.5116	-6.06714	-3.7782	-3.07778	-1.66627	-3.95067	-3.44156	-7.40914	-2.92238	-1.45619	-0.130062	-4.54553	-3.72056	-2.46784	0.0561373	0.0731245	0.92618	0.387948	0.409995	0.26655	0.114015	0.00372669	0.233607
MA0658.1_LHX6	1.91626	4.5846	3.53608	1.10479	2.23475	1.6086	-0.529818	0.234739	-1.4234	0.364939	-0.337519	-0.585962	-0.0975019	-0.791995	-1.89876	-1.41709	-3.39132	-0.401864	-1.3346	4.46165	-3.79464	-3.03634	-2.68821	0.147972	0.0234021	0.534132	0.299216	0.346027	0.208732	0.147091	0.00169595	0.22865
MA0659.1_MAFG	-2.538	0.497115	-0.803928	-0.649819	1.54938	1.04762	-1.37517	-2.84469	-1.85056	-1.7509	-1.3544	0.589807	0.593483	2.12697	-0.265981	0.224686	1.78079	0.566511	2.84026	3.719	0.377346	-1.47936	-0.843989	0.226011	0.0354776	0.247334	0.175175	0.873454	0.344154	0.063643	0.126488	0.00381085
MA0660.1_MEF2B	-1.71496	0.858787	-1.5621	2.37673	1.0994	1.29025	1.09449	2.04464	1.03812	1.42565	0.920446	0.560177	-1.20445	-1.16205	1.58892	-0.40218	-4.61735	-3.23352	-2.09167	3.78452	-2.90136	-2.60318	0.848388	0.0847336	0.72288	0.365311	0.314023	0.466953	0.561232	0.703114	0.307668	0.0117686
MA0661.1_MEOX1	-0.480031	-0.737898	-2.57714	3.44373	1.81502	2.25232	2.05855	-0.702761	0.717746	0.474283	0.480855	0.467755	-1.51823	-0.478955	-0.599053	-1.93789	-1.61101	0.349041	0.321519	4.32872	-1.14136	-3.48097	-2.29848	0.012255	0.139011	0.811102	0.0550966	0.0962583	0.120663	0.0771542	0.971538	0.0835321
MA0662.1_MIXL1	2.77411	4.39987	2.20741	0.515934	3.26016	3.81252	0.147055	-3.41003	-2.5068	-0.458863	-1.68772	-0.911361	-2.10904	-0.883975	-1.96656	-0.703398	-2.32184	-1.54945	-0.0583434	2.13677	-2.93474	-2.41172	-2.91587	0.652142	0.0393952	0.492738	0.296204	0.894223	0.297561	0.108073	0.000255021	0.953174
MA0663.1_MLX	8.0451	16.6723	6.89457	1.82355	6.70918	9.87589	-2.50694	-4.17967	-2.51098	-4.93902	-3.48634	-3.61167	-6.02532	-3.59646	-3.13077	-6.1136	-4.73441	-2.08217	-4.2822	-4.42585	-5.63313	-6.34815	3.16341	0.323567	0.052343	0.26402	0.828617	0.376584	0.178511	0.852146	0.00161261	0.673756
MA0664.1_MLXIPL	9.46673	17.4136	6.7116	2.33106	6.98395	9.01227	-2.44667	-3.82371	-1.7444	-2.86538	-4.09306	-2.95466	-5.40121	-2.95662	-3.08902	-7.14207	-5.91145	-1.97967	-5.20627	-3.48692	-6.56959	-6.86252	2.5046	0.261481	0.0375456	0.441045	0.605462	0.0744508	0.0767671	0.980988	0.0020078	0.215192
MA0665.1_MSC	-4.69568	-5.74904	-4.36881	-0.553095	-0.526494	-2.37744	-1.72712	-0.617772	-0.707561	-0.0103189	3.46804	-0.447586	1.15676	1.74815	0.400143	1.16296	1.05944	2.37432	4.85683	6.92946	0.864169	-0.210889	0.314695	0.00968194	0.860425	0.239994	0.94553	0.982831	0.111096	0.0721181	0.0272821	0.07779
MA0666.1_MSX1	0.649137	1.94098	1.33211	1.61506	3.63713	4.32761	-0.623804	-3.3653	-1.10904	-1.03246	-0.717003	-1.1405	-0.562557	-0.108338	-2.01121	-2.19	-2.82096	0.31915	1.06903	4.04822	-2.32735	-3.26861	-1.99446	0.132081	0.0140582	0.476242	0.916064	0.0947052	0.0546983	0.0505683	0.000715973	0.579057
MA0667.1_MYF6	-4.62979	-3.99104	-4.40223	-0.822281	-0.906207	-1.63631	-0.494415	0.241509	-1.38453	-1.82848	1.61127	-0.212452	1.51825	4.36137	1.44382	-0.713222	1.41457	1.75226	4.47197	4.66085	1.61684	-0.701702	-0.00214267	0.000859662	0.359323	0.739632	0.134876	0.258915	0.124596	0.0511607	0.0253141	0.0143422
MA0668.1_NEUROD2	-5.35427	-6.67837	-5.59799	0.672031	0.965896	-0.557155	1.209	-0.865242	-0.537562	0.90555	2.15437	1.65162	3.70924	0.0224943	1.81234	1.65474	1.03635	3.08517	5.07238	3.20891	-0.973107	-1.26618	-3.38156	0.000598183	0.623971	0.109451	0.824207	0.689262	0.0478409	0.00509122	0.0571153	0.573975
MA0669.1_NEUROG2	-4.98721	-4.25742	-4.80978	0.370749	-0.51655	-0.843692	0.826318	-0.10503	-1.21748	0.138866	1.53513	0.255667	4.0387	0.322808	2.7658	0.697066	2.80859	2.1441	4.68565	2.95734	0.668402	-2.02786	-2.20471	0.00130023	0.826406	0.340628	0.249069	0.71161	0.363524	0.0220072	0.0389448	0.119137
MA0670.1_NFIA	3.01804	2.20116	1.87465	-4.07212	-1.38731	-1.54997	-1.35089	-2.63327	-2.14024	1.09698	-0.715829	-0.122993	-0.00171027	1.07633	-0.978551	0.773185	-1.82127	0.509585	5.38583	7.51463	0.962842	-1.27101	-4.99929	0.0211223	0.777546	0.0363282	0.949309	0.746794	0.134907	0.0844338	0.456385	0.183068
MA0671.1_NFIX	2.60939	1.32349	2.19359	-3.0394	-1.45171	-2.04998	-1.63183	-2.03019	-3.11517	0.882678	-1.15746	-1.64867	1.34021	1.16018	-0.409881	1.40829	-0.252232	0.497128	6.1483	6.09531	1.94231	-1.81311	-5.5331	0.0024508	0.908207	0.162342	0.240174	0.916684	0.183257	0.103181	0.253409	0.0502243
MA0048.2_NHLH1	-3.15531	-4.90638	-3.82315	-0.712904	-1.11093	-3.14316	0.42706	-1.25971	0.947212	1.89317	1.86524	-0.401065	-0.755618	1.32222	-0.832119	1.65991	-1.14745	0.122678	3.24656	9.8605	-0.792132	0.679264	2.71275	0.0727055	0.168244	0.346052	0.309346	0.852123	0.29169	0.343788	0.00254779	0.427861
MA0672.1_NKX2-3	-4.45571	-4.9263	-4.28413	-0.223306	-1.00308	-1.09168	-0.366338	0.647814	-0.110735	0.328392	1.3422	1.54242	3.2403	1.0137	2.46667	1.61264	2.8319	0.00186672	2.37517	4.65849	1.7974	-0.395024	-1.0988	0.00064834	0.114315	0.107025	0.212878	0.985314	0.939462	0.245065	0.0113883	0.0832456
MA0673.1_NKX2-8	-3.65683	-3.46105	-3.17435	-0.362236	-1.51092	-2.36568	-0.300199	1.01934	-1.13422	0.00172717	0.141636	1.01927	2.17329	1.83184	-0.0687395	0.36174	1.41445	0.18027	4.23987	3.60337	1.97621	0.86338	-1.37417	0.0664481	0.210416	0.509342	0.319816	0.660821	0.294583	0.247466	0.0030566	0.0522911
MA0674.1_NKX6-1	-3.04765	-1.66985	-2.4291	1.66257	0.945234	-1.57864	1.07145	0.601769	-0.105677	0.353422	-0.302074	1.9162	-0.423379	-0.125926	0.703544	-0.733389	-0.897206	0.461181	1.92465	5.78085	-0.509423	-1.37127	-1.30416	0.0938515	0.87619	0.868744	0.473826	0.117066	0.155193	0.136002	0.0985704	0.705893
MA0675.1_NKX6-2	2.57406	5.09648	2.0746	0.0967113	2.10094	2.90674	-0.717109	-2.09792	-2.19862	-0.992578	-1.16014	0.0590537	-2.15176	-0.518686	-2.15511	0.509465	-2.20852	-0.294036	1.4999	2.16415	-3.46568	-2.21268	-3.81327	0.285684	0.0358501	0.190157	0.25059	0.677194	0.355831	0.0117029	0.0013701	0.960229
MA0678.1_OLIG2	-5.34038	-7.39246	-4.54417	-0.248587	1.93466	-0.609129	0.247662	-1.00133	-0.397908	0.0264846	3.12903	2.24279	3.95286	0.565894	1.82907	1.27377	0.866368	2.25549	3.5112	1.94436	-0.122528	-0.508336	-2.54723	0.0063169	0.461451	0.12853	0.826447	0.401632	0.0745949	0.0211097	0.0716825	0.591867
MA0679.1_ONECUT1	-0.441426	0.156133	-0.114769	-1.78757	-0.917203	-0.895003	-0.684775	-2.50777	-2.22464	0.403557	1.23009	-0.583089	1.62314	1.70564	-0.213517	1.99185	-0.567886	-0.283915	2.97149	6.8433	0.590894	-0.0559421	-3.94224	0.0470682	0.412386	0.0494562	0.44824	0.846205	0.385194	0.168666	0.928411	0.110118
MA0068.2_PAX4	-0.924816	-0.653762	-0.393434	2.97657	3.14821	1.91085	2.34273	1.19627	-1.12168	0.736051	1.35002	1.8086	-0.47641	-1.82423	-0.678335	-2.3691	-2.72924	-1.84879	-2.61493	2.11699	-1.79611	-1.98781	0.601922	0.0065797	0.199524	0.682939	0.0141384	0.0515693	0.351233	0.878851	0.964814	0.00461392
MA0680.1_PAX7	3.70055	4.10863	3.3589	-0.259904	1.58778	1.40086	-0.590962	-1.75862	-1.22366	-2.12699	-0.663649	-1.12935	-3.5682	-0.394521	-1.38138	-1.01009	-2.20665	-0.683356	1.09714	2.70186	-2.30933	-1.75085	-1.91959	0.029158	0.0490134	0.843801	0.67884	0.886362	0.105562	0.0862268	0.0024703	0.720926
MA0683.1_POU4F2	-0.433921	2.18659	-1.10118	1.87947	0.562628	1.16306	1.25464	0.372142	-0.00756683	0.768629	1.1906	1.6129	-1.90355	-2.80473	1.63414	-1.52779	-3.72629	-0.538845	0.532898	7.22996	-4.14958	-2.24582	-3.35266	0.436833	0.282524	0.229486	0.241274	0.42722	0.166527	0.13938	0.796895	0.0940595
MA0684.1_RUNX3	-2.43272	-0.703723	-1.67573	-0.791357	1.26894	2.48099	-1.58893	-1.57682	-1.30662	-1.85181	-0.961974	0.483036	0.0382606	1.22186	-0.388672	-0.327954	1.32834	0.953324	3.89838	3.87979	0.567546	-1.87571	-1.29618	0.0950922	0.120756	0.404317	0.276607	0.85021	0.159587	0.040571	0.352932	0.0127941
MA0685.1_SP4	9.68817	21.4425	11.4604	-0.604702	8.42614	8.57077	-3.8023	-2.5741	-2.94526	-2.60579	-5.70928	-3.3903	-4.9607	-3.41787	-3.84297	-3.58563	-10.5	-3.13534	-5.28259	-1.4895	-6.67643	-4.53975	-2.3871	0.142498	0.10379	0.493111	0.879282	0.54705	0.465843	0.498561	0.0053189	0.261794
MA0686.1_SPDEF	0.409491	1.59985	-0.320672	-0.578054	2.68366	2.26135	-1.23058	-1.47864	-0.779991	-1.49033	-0.0517961	-2.3117	0.483689	0.5437	-1.3311	-0.707207	-1.56532	1.39356	2.86235	0.206932	-0.221855	-1.08422	-1.83044	0.498376	0.119814	0.874304	0.260343	0.261461	0.0615072	0.0598267	0.00845941	0.0521044
MA0080.4_SPI1	-1.75575	-1.01281	-1.41449	-1.07681	0.118396	-0.717456	-2.29962	-1.81034	-2.2742	-1.02031	0.347657	-0.391574	2.32121	2.71149	0.425875	1.31079	2.19355	0.582754	3.79735	1.64672	0.39747	0.529079	-0.912407	0.128626	0.0314772	0.0324576	0.0709431	0.940673	0.823065	0.155976	0.618993	0.0008277
MA0687.1_SPIC	-1.23053	-0.662719	-1.29311	0.00925855	0.750976	-1.35445	-0.676217	0.111876	-1.59993	-1.39059	-0.210024	-1.44488	0.173125	0.46152	0.267692	0.502117	1.20159	0.127408	3.5038	3.26363	0.360481	0.897329	-0.68242	0.294281	0.545719	0.670055	0.0765117	0.348953	0.315102	0.18281	0.612432	0.00246833
MA0083.3_SRF	-4.53089	-1.46903	-3.05403	1.78769	2.43117	1.16094	1.66837	-0.125481	2.30753	1.9571	1.82411	-0.427252	-0.0481501	-0.371113	0.107685	-0.562531	-4.70768	1.37132	-1.53598	2.87809	-2.82389	-0.730377	1.71924	0.019974	0.576789	0.883789	0.252852	0.436087	0.297535	0.457234	0.193077	0.0586262
MA0009.2_T	-2.48552	-1.92872	-0.798377	-0.700413	0.976601	1.2035	-2.2749	-2.15708	-3.17583	-0.0616215	-0.637204	0.148236	1.15434	-0.0783024	0.0206812	1.25989	3.25429	1.90642	4.10725	5.23223	1.19674	-1.60032	-1.61618	0.0476806	0.0202713	0.00541838	0.31218	0.279495	0.373435	0.0308631	0.391805	0.00696126
MA0688.1_TBX2	-2.39067	-2.11955	-0.67134	0.472052	3.53895	2.80714	1.77483	-2.7196	-0.995365	-1.13146	0.329129	-0.0657084	-1.48518	0.068588	0.645639	-1.23093	0.453799	3.66014	2.11748	3.85501	-1.36084	-1.71306	-3.66991	0.0297152	0.150587	0.815916	0.968797	0.911623	0.0775691	0.00468659	0.550193	0.541342
MA0689.1_TBX20	-2.36796	-3.5777	-1.56308	-0.262283	1.62898	2.30622	0.338258	-3.30398	-2.13888	0.692518	-0.252153	0.0363638	0.364681	0.473029	1.24895	1.04177	1.06393	2.73893	4.81493	3.72286	-0.171999	-0.424192	-4.50179	0.0206461	0.0980951	0.220642	0.245384	0.327995	0.045704	0.0440558	0.910427	0.101479
MA0690.1_TBX21	-1.77729	-2.4768	-0.294222	0.504184	1.60441	4.00408	1.26149	-2.42949	-1.82403	0.0844064	-0.6784	-0.207361	-1.81221	0.176787	0.15205	0.527488	1.12419	1.92593	4.11877	4.01112	-2.07183	-1.32015	-2.28091	0.0537867	0.120911	0.590615	0.769608	0.17635	0.0574574	0.00953944	0.443461	0.249502
MA0090.2_TEAD1	-4.08371	-2.6792	-3.75607	2.70813	0.317377	0.744653	1.73064	-0.115475	0.404724	1.4392	2.56615	1.85341	-1.24035	0.201738	1.75329	0.365327	-1.95829	0.884252	0.705873	4.29556	-3.67947	-1.00279	-0.722519	0.00944412	0.562495	0.132032	0.176073	0.546161	0.203546	0.0689924	0.0867232	0.0912709
MA0691.1_TFAP4	-6.011	-5.05552	-4.53008	-1.61572	-2.01088	-4.03949	-1.23832	0.86562	1.77689	0.868136	1.50316	0.553929	3.11335	3.07944	1.40386	2.10722	1.61474	0.932062	4.18577	6.25679	1.31313	-1.06223	0.343432	0.0509832	0.0623432	0.63422	0.0920016	0.364915	0.33857	0.132116	0.000478815	0.0784718
MA0145.3_TFCP2	-1.29946	0.416924	-1.11017	-0.133965	0.0360567	0.663301	0.527679	0.621649	1.61358	-0.346298	0.294229	-0.099631	-0.244497	0.0917431	0.306485	-0.325327	-1.48703	-0.259958	-0.38469	2.30444	0.175296	-1.00569	-0.995683	0.254488	0.167285	0.0887404	0.700618	0.332648	0.259515	0.319237	0.149843	0.163427
MA0692.1_TFEB	3.76231	9.02234	3.23718	2.0534	3.67909	4.50051	-2.06496	-2.50865	-1.61764	-0.230572	-1.99544	-3.47903	-5.27908	-2.12634	-3.46098	-3.78693	-3.16438	-0.0266841	-0.19311	-0.729758	-4.1044	-3.51451	2.84586	0.412156	0.00993771	0.881299	0.259425	0.891093	0.015335	0.625138	0.000637687	0.853616
MA0694.1_ZBTB7B	-1.46237	0.520697	-1.13312	-3.40981	0.576593	0.0780628	-1.77931	1.2243	-1.80087	0.873545	-2.61402	0.155436	0.796723	2.18746	0.0526119	1.7359	-1.07961	0.221876	3.67719	4.19364	0.585596	0.232977	-2.57503	0.881589	0.93815	0.869135	0.294427	0.71567	0.314921	0.112466	0.873572	0.100835
MA0695.1_ZBTB7C	-3.28926	-1.68566	-2.78597	-1.30081	-0.514241	-1.04289	-0.688493	0.116168	-0.921869	-0.562807	-0.496891	0.0754412	2.05742	2.6	1.18149	2.67263	-0.426332	1.48817	4.48395	5.05659	0.374559	0.702543	-3.84848	0.0556029	0.314278	0.676877	0.0170812	0.68917	0.31097	0.0710633	0.0248036	0.0279119
MA0696.1_ZIC1	-4.91601	-6.46485	-6.71197	-1.64225	-0.133247	-2.91281	-1.0763	0.0797794	-2.28902	1.78742	1.65589	2.00987	2.59004	3.60359	2.28198	2.16858	2.04486	2.8833	6.83988	5.86811	0.630111	-1.78139	-3.85652	0.0133858	0.681092	0.0481047	0.119764	0.211573	0.121462	0.0177648	0.0117391	0.153609
MA0697.1_ZIC3	-2.45358	-3.07722	-3.11021	-0.90248	0.335567	-3.33408	-1.75789	-0.584761	-2.79771	1.11726	0.890657	1.12635	3.48844	4.6844	-0.00298762	1.61384	2.62958	2.36431	4.40338	4.26764	0.00343256	-1.4127	-2.97649	0.278463	0.761756	0.0479	0.354935	0.719614	0.158525	0.0105862	0.0831171	0.0629782
MA0698.1_ZBTB18	-6.26677	-4.99025	-4.19038	-1.47169	-0.300779	-2.91633	0.146052	-2.18337	-1.02773	0.705063	1.42704	0.521211	1.52078	2.32935	2.42852	2.45553	3.3128	3.94085	5.22298	4.43675	0.898191	-1.19578	-2.16573	0.0225855	0.621515	0.0894694	0.0388582	0.270644	0.0815422	0.0162522	0.0142666	0.0242504
MA0699.1_LBX2	3.15636	5.54481	2.10223	1.13935	2.36862	2.83355	0.10573	-2.18209	-1.53263	0.842663	-0.654192	-0.952909	-2.62782	-0.617462	-2.19559	-0.89651	-4.00961	-0.824639	-0.639685	4.0642	-3.66159	-2.55441	-2.58919	0.283996	0.020222	0.343476	0.132726	0.754736	0.242796	0.134527	0.000978669	0.347052
MA0700.1_LHX2	0.811253	2.65339	0.871901	2.37561	2.64737	5.57148	1.45497	-1.30036	0.500601	-0.810379	-0.0637623	-2.49041	-1.82471	-0.0657523	-2.59464	-3.52827	-2.22992	1.00674	-0.950433	2.85022	-3.71468	-4.55124	-0.660717	0.17046	0.0671684	0.283589	0.736908	0.260332	0.05865	0.0711577	0.00938576	0.258877
MA0701.1_LHX9	2.57406	5.09648	2.0746	0.0967113	2.10094	2.90674	-0.717109	-2.09792	-2.19862	-0.992578	-1.16014	0.0590537	-2.15176	-0.518686	-2.15511	0.509465	-2.20852	-0.294036	1.4999	2.16415	-3.46568	-2.21268	-3.81327	0.285684	0.0358501	0.190157	0.25059	0.677194	0.355831	0.0117029	0.0013701	0.960229
MA0702.1_LMX1A	2.57406	5.09648	2.0746	0.0967113	2.10094	2.90674	-0.717109	-2.09792	-2.19862	-0.992578	-1.16014	0.0590537	-2.15176	-0.518686	-2.15511	0.509465	-2.20852	-0.294036	1.4999	2.16415	-3.46568	-2.21268	-3.81327	0.285684	0.0358501	0.190157	0.25059	0.677194	0.355831	0.0117029	0.0013701	0.960229
MA0703.1_LMX1B	2.57406	5.09648	2.0746	0.0967113	2.10094	2.90674	-0.717109	-2.09792	-2.19862	-0.992578	-1.16014	0.0590537	-2.15176	-0.518686	-2.15511	0.509465	-2.20852	-0.294036	1.4999	2.16415	-3.46568	-2.21268	-3.81327	0.285684	0.0358501	0.190157	0.25059	0.677194	0.355831	0.0117029	0.0013701	0.960229
MA0706.1_MEOX2	-2.87878	-1.48594	-3.19571	2.24768	0.722557	-0.766909	0.0732172	-0.158487	0.700825	0.746843	0.743617	0.125083	0.18924	0.249186	0.674796	0.072473	-2.13189	-0.220453	2.36387	6.31701	0.172836	-2.768	-1.21399	0.0433599	0.610919	0.37145	0.553237	0.421444	0.180809	0.151889	0.203542	0.963498
MA0707.1_MNX1	1.00971	1.86597	1.04051	-0.402954	2.05349	1.76745	1.10633	-2.58705	-1.41769	-0.21588	-0.0141371	0.98974	-1.23434	0.503406	-1.50338	-1.11295	-1.0137	-0.751827	2.31007	3.01416	-1.86681	-1.16122	-3.5267	0.855565	0.198104	0.382445	0.259027	0.663195	0.154361	0.0640672	0.0498322	0.790122
MA0708.1_MSX2	-1.53774	-1.11636	0.0790982	-0.109382	2.85344	0.0417413	-2.53264	-2.72508	-1.48132	-0.224391	-0.137424	0.657851	1.92931	0.345687	0.801673	0.616011	0.107489	0.781169	3.12526	3.33465	-0.0804763	0.0653749	-2.82524	0.197589	0.0653975	0.0100694	0.181943	0.306941	0.119652	0.0554265	0.218629	0.0334432
MA0122.2_NKX3-2	-4.02273	-3.82582	-2.60887	-1.3066	0.622229	0.222433	0.120743	-1.11443	-1.30676	-0.0665056	0.100049	1.34274	1.50048	1.22395	1.6286	1.459	3.34464	0.705452	2.41744	3.1279	0.266777	0.497011	-2.02449	0.0125397	0.456405	0.123891	0.147726	0.495675	0.812083	0.0819639	0.106784	0.029569
MA0710.1_NOTO	2.65057	4.9193	2.35962	1.03429	2.40191	3.72418	-0.101941	-1.49668	-1.4332	0.0224611	-0.442426	-1.61943	-3.5222	-0.228929	-2.18813	-1.64478	-3.37269	0.66778	0.0286316	3.89525	-3.79271	-2.49353	-3.56699	0.456781	0.028651	0.646277	0.313372	0.710577	0.0715641	0.0450404	0.000366998	0.433688
MA0711.1_OTX1	-0.0671407	0.243991	0.21553	-2.0038	0.217848	-0.319562	-0.99566	-0.0176096	-0.347589	1.12251	1.12875	1.32495	0.433881	0.576438	0.526173	-0.341439	-0.737613	0.359146	-0.529889	1.09642	-0.932685	-0.0590995	-0.114387	0.339017	0.75789	0.0242961	0.00204993	0.106269	0.208477	0.298026	0.243691	0.45293
MA0712.1_OTX2	-3.78212	-3.538	-2.53484	2.76477	-1.7162	-1.94292	2.76983	1.35273	0.616791	0.0630231	6.31255	1.29651	-0.345945	-0.0725777	2.72677	0.773503	-1.75762	-1.51132	1.22071	1.845	-0.341539	-1.51103	-0.381162	0.185045	0.349036	0.667502	0.466603	0.507732	0.592436	0.347312	0.0165739	0.0887997
MA0132.2_PDX1	-3.04765	-1.66985	-2.4291	1.66257	0.945234	-1.57864	1.07145	0.601769	-0.105677	0.353422	-0.302074	1.9162	-0.423379	-0.125926	0.703544	-0.733389	-0.897206	0.461181	1.92465	5.78085	-0.509423	-1.37127	-1.30416	0.0938515	0.87619	0.868744	0.473826	0.117066	0.155193	0.136002	0.0985704	0.705893
MA0713.1_PHOX2A	-2.15595	0.265578	-1.81473	3.07082	0.486359	1.2301	1.11085	0.472144	1.97584	0.813269	2.52476	2.45489	-1.83219	-0.748688	0.709999	-1.43426	-3.69027	-0.693037	-0.650651	5.76008	-5.79499	-2.99087	-0.543581	0.0584891	0.672908	0.356055	0.054818	0.295113	0.199969	0.163892	0.158575	0.0152543
MA0714.1_PITX3	-4.18974	-2.29748	-2.27036	2.08139	-0.0612602	-0.993382	2.75338	-0.143093	0.113168	-0.210773	2.61035	0.585377	0.191024	-0.150976	-0.235657	-0.684962	0.173831	-0.349043	3.29484	2.13703	0.892727	-0.720046	-1.35777	0.048794	0.685591	0.947777	0.333494	0.735417	0.206135	0.188013	0.0625033	0.361688
MA0715.1_PROP1	-2.58524	-0.176056	-2.87568	1.75181	0.503285	1.13895	0.887097	-0.271358	0.577503	1.36933	2.28955	2.17657	-0.584964	0.507804	-0.368391	-0.786632	-2.89466	0.305861	0.951435	6.73368	-3.67312	-1.97349	-1.26982	0.0557461	0.216203	0.0279208	0.00952348	0.336994	0.151238	0.123725	0.122507	0.135581
MA0716.1_PRRX1	2.57406	5.09648	2.0746	0.0967113	2.10094	2.90674	-0.717109	-2.09792	-2.19862	-0.992578	-1.16014	0.0590537	-2.15176	-0.518686	-2.15511	0.509465	-2.20852	-0.294036	1.4999	2.16415	-3.46568	-2.21268	-3.81327	0.285684	0.0358501	0.190157	0.25059	0.677194	0.355831	0.0117029	0.0013701	0.960229
MA0717.1_RAX2	2.57406	5.09648	2.0746	0.0967113	2.10094	2.90674	-0.717109	-2.09792	-2.19862	-0.992578	-1.16014	0.0590537	-2.15176	-0.518686	-2.15511	0.509465	-2.20852	-0.294036	1.4999	2.16415	-3.46568	-2.21268	-3.81327	0.285684	0.0358501	0.190157	0.25059	0.677194	0.355831	0.0117029	0.0013701	0.960229
MA0718.1_RAX	2.25028	4.86557	1.98253	0.910122	2.39007	2.23089	-0.0760867	-1.38999	-1.00259	-0.182711	-1.3193	-1.15503	-2.2198	-0.31404	-1.31417	-0.968976	-3.4482	0.154236	0.283332	5.20726	-3.07274	-2.31933	-3.10042	0.333493	0.0128475	0.910949	0.582245	0.589711	0.143432	0.101995	0.000818297	0.843982
MA0719.1_RHOXF1	-3.68366	-3.09112	-4.29707	2.53874	-0.592407	-2.90203	2.25323	1.10092	2.31129	1.03056	1.54005	2.71509	-0.367784	-1.54165	0.857071	1.07512	-0.563956	0.718188	1.54284	3.81412	0.47396	-1.91992	-1.22203	0.160557	0.2946	0.852373	0.0748526	0.621487	0.252102	0.0711278	0.0131617	0.0154342
MA0721.1_UNCX	2.57406	5.09648	2.0746	0.0967113	2.10094	2.90674	-0.717109	-2.09792	-2.19862	-0.992578	-1.16014	0.0590537	-2.15176	-0.518686	-2.15511	0.509465	-2.20852	-0.294036	1.4999	2.16415	-3.46568	-2.21268	-3.81327	0.285684	0.0358501	0.190157	0.25059	0.677194	0.355831	0.0117029	0.0013701	0.960229
MA0722.1_VAX1	-0.830972	0.790398	-0.426899	1.55434	1.49419	1.36306	0.570213	-0.664727	-0.994872	0.488218	1.58286	1.74206	-1.64793	-0.203993	-0.847142	-1.64285	-2.83005	1.00389	2.05994	6.06998	-2.88127	-3.88556	-2.76028	0.0773493	0.0594433	0.0594492	0.0195518	0.20741	0.0627976	0.0500402	0.751512	0.262265
MA0723.1_VAX2	-3.04765	-1.66985	-2.4291	1.66257	0.945234	-1.57864	1.07145	0.601769	-0.105677	0.353422	-0.302074	1.9162	-0.423379	-0.125926	0.703544	-0.733389	-0.897206	0.461181	1.92465	5.78085	-0.509423	-1.37127	-1.30416	0.0938515	0.87619	0.868744	0.473826	0.117066	0.155193	0.136002	0.0985704	0.705893
MA0724.1_VENTX	-1.43114	-1.05638	-1.30187	1.01255	-0.083251	-0.672295	-0.786135	-1.15338	-0.970747	-0.199643	-0.661945	1.4814	0.61646	-0.581456	1.71224	0.535766	-0.0417097	1.9388	2.5361	1.73842	-0.745282	0.781893	-3.51741	0.105577	0.160821	0.210082	0.706485	0.678061	0.0297778	0.119344	0.712692	0.215161
MA0725.1_VSX1	-1.46028	0.043058	-4.41674	2.68788	3.18805	3.61588	0.610604	0.906039	0.613451	-0.965152	2.98498	0.0799142	-0.827403	-0.647621	0.579538	-0.547182	-2.02779	1.32203	-1.54905	2.7781	-3.5046	-2.89218	-2.82064	0.0546982	0.00621395	0.993957	0.495722	0.385425	0.244606	0.0869276	0.947496	0.0573437
MA0726.1_VSX2	-1.46028	0.043058	-4.41674	2.68788	3.18805	3.61588	0.610604	0.906039	0.613451	-0.965152	2.98498	0.0799142	-0.827403	-0.647621	0.579538	-0.547182	-2.02779	1.32203	-1.54905	2.7781	-3.5046	-2.89218	-2.82064	0.0546982	0.00621395	0.993957	0.495722	0.385425	0.244606	0.0869276	0.947496	0.0573437
MA0112.3_ESR1	-4.3145	-3.50982	-2.92935	-0.220307	-0.437674	-3.22917	1.97412	-0.982856	0.708263	1.43659	2.96842	1.66603	0.831719	0.384512	2.36176	2.04871	0.293362	-0.992764	2.26942	4.84662	0.64419	0.859508	-2.49194	0.128184	0.224285	0.230194	0.341486	0.985659	0.680623	0.313382	0.0019706	0.720503
MA0141.3_ESRRB	-3.94513	-4.25309	-3.2491	-2.27047	-0.312731	-2.82681	-1.52745	-2.4079	-0.564044	0.204056	0.351241	0.425467	2.68981	2.72029	1.01912	2.43457	1.52643	1.58045	6.08991	3.58616	1.00349	1.59857	-0.688093	0.104244	0.762309	0.0733837	0.0819929	0.836664	0.307794	0.124175	0.0146641	0.00167204
MA0017.2_NR2F1	-3.72898	-0.747549	-2.46808	-0.408363	-0.921986	-1.2269	-0.847146	0.337101	-1.54958	-0.604609	0.609319	-0.385739	1.21716	1.92713	-0.435356	1.14839	1.11256	1.20011	4.38554	1.32164	-0.201617	1.27923	-0.188933	0.227867	0.801838	0.453655	0.283513	0.77602	0.377603	0.184901	0.0880759	0.00796481
MA0113.3_NR3C1	-6.17924	-6.96945	-5.83396	3.22477	-1.93838	-1.85322	2.70639	2.50019	3.3658	2.21456	5.08511	3.8747	0.403878	-0.228711	0.562697	-0.79625	-2.21481	1.93815	1.09173	5.12864	-0.0406778	-1.61879	0.292497	0.0643552	0.214123	0.409727	0.0436271	0.217189	0.0610461	0.106051	0.00773508	0.00133688
MA0727.1_NR3C2	-6.39504	-7.18755	-5.91164	2.54234	-2.23107	-2.31593	2.30113	2.57173	3.58748	2.61593	4.78852	3.65903	0.189266	0.140199	0.532207	-0.112389	-2.4979	1.88659	1.60532	5.82464	0.479408	-2.019	0.029133	0.0614992	0.155553	0.317211	0.0285512	0.407467	0.0967154	0.0998895	0.00514029	0.00302652
MA0729.1_RARA	-0.631164	-1.36905	-1.46055	-2.22564	-0.380478	-3.30791	-0.114267	-0.752987	-0.493986	-1.02629	0.303214	0.94697	1.65404	2.80842	-0.792151	0.79048	-0.772592	1.01666	4.97351	2.7856	0.485145	1.17164	-0.814904	0.443514	0.213925	0.464065	0.41042	0.424903	0.126126	0.132439	0.029931	0.0393392
MA0730.1_RARA(var.2)	-3.67974	-2.08107	-1.85812	0.681629	-0.659638	-1.96377	1.17647	-0.420502	1.5667	-0.198225	2.57043	-0.298933	0.339785	-0.475062	1.10766	-0.358951	-1.99605	0.809314	2.6612	2.60204	1.04174	-0.373372	0.0988545	0.124102	0.222465	0.944939	0.749527	0.276198	0.08342	0.0826691	0.0144722	0.722126
MA0731.1_BCL6B	-1.09741	-1.47334	-0.597621	-2.23024	0.788713	-2.33659	0.391197	-1.30234	-1.5237	-0.186584	1.54371	1.31301	0.879419	-0.153161	0.940073	0.491917	-0.590505	-1.34952	4.12421	4.61498	2.47993	0.321086	-2.64495	0.863337	0.729937	0.105101	0.636996	0.454454	0.318836	0.378821	0.122236	0.365261
MA0472.2_EGR2	4.89148	9.82744	4.06104	-0.735984	4.61752	5.96654	-0.749422	-1.37008	-2.12036	0.0198161	-2.15235	-0.439958	-3.44075	-0.947993	-2.22194	-2.30544	-6.85561	-0.342298	-3.51941	4.06344	-6.35859	-5.36771	-1.45256	0.336972	0.1442	0.518876	0.240854	0.477698	0.251205	0.178408	0.00701671	0.163658
MA0732.1_EGR3	4.13793	9.17412	3.68477	-0.826355	5.00498	5.39742	-0.11513	-0.998662	-2.05036	0.0595097	-3.06534	-1.29568	-2.18021	-0.605878	-1.14581	-2.06559	-7.09958	-1.74206	-2.32589	1.78416	-4.91983	-4.58648	-0.782952	0.407984	0.161811	0.742899	0.911185	0.412257	0.341299	0.221964	0.00607439	0.23268
MA0733.1_EGR4	3.55979	7.04326	3.81126	-1.2421	4.71179	6.53133	-1.26154	-2.77909	-2.90524	0.338144	-3.02598	-1.58811	-2.17222	-0.0902363	-1.81723	-1.12522	-6.04677	-0.470363	-1.31802	2.43735	-5.81626	-3.17355	-1.4448	0.612964	0.131781	0.47933	0.958398	0.527436	0.337868	0.0970573	0.00294434	0.963603
MA0734.1_GLI2	-2.83064	-1.52047	-2.65819	-0.854851	0.482958	1.05624	-0.771492	-0.433932	-1.21659	0.888957	0.409507	0.377271	2.01494	1.704	-0.620912	1.90352	-0.559353	1.45377	3.8488	4.57369	-1.69647	-0.433582	-1.95495	0.025173	0.200985	0.0102826	0.628687	0.831707	0.224625	0.0225069	0.242488	0.170147
MA0735.1_GLIS1	0.0243806	-0.832184	-0.572836	-0.921966	2.41678	1.08738	-0.700295	0.393028	-2.64179	-1.12964	-0.308283	2.271	0.332181	0.274878	1.04984	1.54849	-1.32729	-1.30939	2.54389	2.87206	-0.300529	-2.08692	-3.69208	0.304962	0.234065	0.405939	0.816574	0.810651	0.575391	0.117052	0.534232	0.708784
MA0736.1_GLIS2	-1.20543	0.510545	-0.816897	-0.939065	2.38368	-1.87486	-0.874233	-0.668348	-2.69276	1.0077	0.969579	1.4598	1.58186	1.56586	0.287517	2.37274	-0.73431	0.278614	0.189518	3.07568	1.52552	-0.133971	-6.32034	0.814644	0.445552	0.0507741	0.99903	0.869467	0.862857	0.362342	0.836426	0.642653
MA0737.1_GLIS3	-0.954639	-0.0289545	-0.677659	-0.904474	1.21726	-0.618065	-2.29045	-0.30375	-1.68466	-0.700478	1.85085	1.10763	1.30407	2.07123	0.265818	0.0786436	-0.00021649	-0.163515	3.04	3.02856	0.0768122	-1.35182	-4.15529	0.579369	0.210842	0.0896206	0.645932	0.153133	0.2119	0.0837919	0.990443	0.437505
MA0738.1_HIC2	-3.6861	-3.51473	-2.59522	-0.986275	0.383524	-2.45127	-0.355455	0.159081	-2.13215	0.587922	-0.0195382	-0.246829	0.950109	2.22226	-0.0877435	0.0553652	1.73245	2.11373	6.50339	5.44296	1.61929	-0.344941	-3.58726	0.095398	0.833032	0.33188	0.301186	0.91073	0.0948217	0.0545705	0.041097	0.0639198
MA0740.1_KLF14	12.9612	21.8145	11.7269	-1.38711	7.11961	8.90504	-4.90572	-2.69851	-4.05959	-2.66907	-6.52026	-4.58974	-3.55769	-3.33784	-3.92236	-2.88387	-7.78285	-3.85994	-4.027	-2.05425	-6.41486	-4.3063	-2.15959	0.0772593	0.104579	0.618963	0.469122	0.608787	0.557786	0.529429	0.00510727	0.791936
MA0741.1_KLF16	9.70688	16.0566	9.19143	-1.61149	7.37125	8.03506	-2.76981	-1.06405	-2.84488	-1.55521	-4.75314	-2.90663	-2.3392	-1.79666	-3.38468	-1.89352	-9.78035	-3.35996	-3.78067	-0.0745878	-6.45996	-4.18729	-2.87397	0.145888	0.155421	0.4904	0.624581	0.552619	0.539439	0.252848	0.00494419	0.314683
MA0743.1_SCRT1	-6.22169	-4.57683	-5.27699	0.0113095	-0.328417	-1.63268	0.0330421	-0.748882	-0.891824	-1.51689	1.57932	1.65395	2.19552	1.20747	2.5937	3.75491	1.51513	1.70422	6.60054	5.47226	-1.41192	1.08557	-1.91142	0.00245322	0.855425	0.401791	0.30545	0.671805	0.369383	0.0475521	0.0415436	0.0457764
MA0744.1_SCRT2	-4.83732	-3.39511	-2.85093	-0.655076	-1.33916	-2.80141	-1.46548	-0.861876	-1.37338	-1.2653	1.20173	-0.538348	1.28196	1.82727	1.61221	3.49604	2.53278	1.32309	5.09201	6.94782	0.782442	0.650849	-2.13191	0.0732742	0.628569	0.291593	0.130496	0.177541	0.480666	0.086097	0.0279083	0.00401362
MA0745.1_SNAI2	-7.61268	-5.79374	-8.30229	1.77452	-0.760309	-1.07344	0.0888046	0.0341972	-1.48971	0.247704	2.98682	1.93392	0.704735	1.79284	1.98938	1.18847	2.19308	3.42319	5.75076	8.50577	-2.23748	-3.11372	-2.94094	0.00393387	0.701693	0.0947883	0.815767	0.787265	0.0922955	0.0245056	0.0545143	0.468011
MA0746.1_SP3	10.1538	18.3082	9.23248	-1.21253	9.33824	9.80173	-3.47628	-3.10401	-4.63345	-1.37674	-5.55276	-4.49969	-3.14087	-1.39583	-4.98834	-2.95122	-7.34106	-1.69974	-3.71589	-0.163623	-8.38809	-4.82618	-2.91224	0.229348	0.111817	0.961078	0.717045	0.527889	0.348036	0.151192	0.00302806	0.999176
MA0747.1_SP8	7.45821	14.6795	7.55413	-1.26518	5.75652	7.12831	-3.31807	-1.65111	-2.49231	-0.950293	-4.91262	-3.40395	-1.59413	-1.61193	-2.71404	-2.16587	-6.44609	-1.40646	-2.80941	0.698327	-6.00963	-4.01812	-2.41778	0.163793	0.129857	0.667028	0.440203	0.469183	0.355229	0.110379	0.00457555	0.985421
MA0748.1_YY2	5.45674	8.66263	5.36273	0.0702169	4.40781	3.66107	-3.02451	-2.91718	-1.3619	-2.50022	-3.07131	-1.64467	-0.551056	-0.843783	-0.842672	-2.30078	-4.09712	-5.36649	0.134383	0.556085	-3.76046	-2.62107	-1.20732	0.0961661	0.0464362	0.967935	0.050555	0.219981	0.49868	0.672204	0.00122744	0.433782
MA0749.1_ZBED1	-1.83864	-1.39008	-0.874324	-1.02703	-2.98573	-0.669855	-0.155536	0.368293	-1.05971	1.39818	0.533654	0.375291	2.27494	1.82516	0.567049	0.946635	0.278768	1.15021	2.21624	2.61197	0.0739462	0.770835	-1.52568	0.820906	0.216162	0.120412	0.273783	0.220613	0.0873366	0.0614618	0.0052798	0.137342
MA0750.1_ZBTB7A	-2.3266	0.604095	-1.69663	-1.24789	0.930369	-1.5548	-2.45518	-0.42552	-1.17368	1.12254	-2.29971	1.80664	1.45282	2.75696	-0.779064	2.01809	-0.921632	0.215603	3.44891	3.4753	0.794967	0.345488	-2.84109	0.68639	0.50258	0.350872	0.600089	0.771984	0.418083	0.134921	0.73715	0.14033
MA0751.1_ZIC4	-3.1937	-2.37536	-3.29605	-1.2034	0.080156	-2.0272	-0.954734	0.143934	-1.46042	2.02795	1.16163	1.41033	3.24924	3.57815	0.844398	1.68474	1.95566	0.950285	4.97813	4.23433	-0.047383	-1.40137	-2.93563	0.071348	0.725595	0.0225459	0.357411	0.483485	0.332511	0.0379892	0.0112939	0.225894
MA0088.2_ZNF143	-4.84821	-5.34348	-5.43396	0.437542	-0.988782	-2.36816	1.84593	0.371118	0.19507	1.73248	2.46813	2.32914	1.03547	0.59043	0.186527	1.17809	0.157452	1.09379	3.02045	7.71598	0.55834	-2.46745	-2.08449	0.0296604	0.151119	0.104087	0.00933093	0.92386	0.234004	0.097989	0.0047973	0.595401
MA0752.1_ZNF410	-4.92064	-4.55791	-4.72612	3.3458	-0.467742	-0.373504	1.6534	1.73099	1.03926	2.57058	3.68651	2.40004	1.54054	1.98098	1.09456	2.50443	-0.998182	1.29528	-0.548989	4.6769	-1.10825	-4.34402	-1.54339	0.0463787	0.663045	0.052434	0.0580278	0.731636	0.687867	0.0973128	0.0282146	0.0502225
MA0753.1_ZNF740	-0.547863	1.36754	0.026447	-2.20739	0.677453	-2.59134	0.745971	-0.704633	-1.33215	2.54319	-0.133186	1.19997	1.41955	3.46228	1.89559	1.53896	-1.4635	-1.93651	2.54307	2.23542	-0.493041	-2.46799	-4.85609	0.251296	0.485244	0.177049	0.348489	0.355483	0.696119	0.138869	0.30508	0.826568
MA0754.1_CUX1	-3.54836	-1.44161	-2.7169	2.0272	0.372612	-0.745334	0.541326	0.176211	-2.81136	0.885282	1.38559	-0.678357	1.25229	1.19858	2.56461	1.51038	-1.19805	1.66514	1.28333	4.26299	-0.778393	0.652316	-1.88119	0.0403368	0.405177	0.386874	0.217314	0.453874	0.307736	0.0645312	0.393871	0.22281
MA0755.1_CUX2	-3.08556	-0.887645	-2.34322	1.13266	0.325778	0.0985375	0.737335	-0.818853	-3.22777	0.633515	1.1512	-0.524357	0.724337	1.46223	2.18366	1.95059	-1.16975	1.81322	1.14957	3.72656	-0.589943	0.850617	-1.71647	0.0374784	0.292829	0.319942	0.187935	0.61676	0.430967	0.0645358	0.640212	0.144117
MA0756.1_ONECUT2	-0.32208	1.53825	0.906579	-2.72922	-1.21197	-0.653177	-1.46182	-1.73354	-2.13001	0.349673	0.242244	-0.57349	2.22946	2.14353	-0.686859	1.79721	-1.44194	-0.702294	2.75135	7.09783	0.94199	-0.482668	-3.91101	0.0544979	0.738438	0.0101268	0.329758	0.64059	0.377304	0.204129	0.547291	0.0872632
MA0757.1_ONECUT3	-0.718912	0.96886	0.374297	-2.07828	-2.27537	-1.75918	0.257976	-0.214479	-0.0336777	2.08068	1.00361	-0.973202	1.07293	0.930922	-0.0928365	1.5301	-1.96696	-1.86028	2.2055	7.26929	0.500429	-1.61038	-2.82026	0.0359257	0.000581863	0.516638	0.949857	0.710427	0.448356	0.280151	0.102949	0.904607
MA0469.2_E2F3	5.77604	10.0877	9.57362	-2.5522	1.58861	1.57291	-1.06395	-2.90604	-2.18618	-0.763793	-1.79918	-3.47485	-0.357834	-1.83825	-1.97328	0.0113222	-4.36027	-2.87849	-0.556978	1.47235	-0.960875	-0.578899	-4.69008	0.0128971	0.238271	0.969275	0.550923	0.781319	0.617836	0.477477	0.0254122	0.479645
MA0758.1_E2F7	3.06159	6.34912	3.6867	-1.31944	4.60017	2.38976	-3.57449	-0.853016	-1.52136	-1.55514	-2.60478	-2.32242	-0.705797	0.516899	-1.1172	-1.41274	-3.26746	-2.76532	1.3368	2.04897	-0.589122	-1.97279	-2.6618	0.298276	0.140403	0.85423	0.050798	0.243719	0.245704	0.325599	0.00305746	0.108856
MA0473.2_ELF1	1.47715	4.31104	2.77628	-0.990113	3.10877	4.55126	-3.63462	-3.59967	-3.34452	-3.39416	-2.64975	-0.880933	-0.388885	0.668478	-0.642566	1.00844	-1.43237	1.20707	2.90609	-0.41213	-1.34539	-1.36703	-2.91711	0.756025	0.0737466	0.242665	0.0796238	0.95334	0.442208	0.0628304	0.000533963	0.00101299
MA0759.1_ELK3	6.03013	8.35754	5.01618	-3.93041	4.16412	4.68795	-4.70089	-2.13582	-3.78782	-3.8717	-1.7323	-1.62692	0.766372	0.265493	-0.788494	-1.71404	-2.03334	-1.66417	0.520014	0.155038	-1.61082	-1.3009	-2.7209	0.21934	0.198558	0.341195	0.0551113	0.0400056	0.143639	0.138103	0.00781256	0.00992445
MA0760.1_ERF	3.31718	4.48352	3.29315	-2.72013	3.79735	3.9709	-3.51961	-1.5067	-2.90408	-3.23656	-0.0782924	-0.844571	0.0743764	-0.0315124	-1.98108	-1.03578	-0.95245	0.612029	1.63645	0.051296	-0.34206	-1.82829	-1.86998	0.457763	0.181942	0.336291	0.562501	0.654629	0.0618787	0.0368956	0.00583558	0.0531342
MA0474.2_ERG	4.08777	6.40048	4.15698	-2.7473	4.5959	5.66204	-4.23922	-2.37368	-3.58697	-3.16326	-1.72727	-1.00922	0.0228955	-1.0525	-1.67831	-1.50156	-2.36814	-0.0105403	1.15207	0.769599	-2.11979	-2.59422	-1.89935	0.467053	0.150194	0.163295	0.260406	0.219255	0.0355968	0.00424222	0.00373853	0.0231529
MA0098.3_ETS1	3.22933	3.84779	2.71353	-2.28156	4.20778	5.97499	-3.04264	-2.30847	-3.23377	-2.52231	-0.335873	-1.14666	-0.377648	-0.835591	-2.31359	-1.79463	-2.78418	1.37926	2.01915	0.624134	-2.14495	-1.8266	-1.68794	0.826049	0.158424	0.12448	0.862904	0.24446	0.0220124	0.00933397	0.00518613	0.0918197
MA0761.1_ETV1	5.28399	6.82127	4.56702	-3.00924	4.3277	4.84326	-3.23999	-2.71473	-2.79592	-2.81927	-0.669511	-1.28361	-0.431721	-0.40597	-1.33545	-1.69483	-2.38488	-0.708822	-0.0450814	0.666461	-1.59202	-2.56426	-1.83001	0.29943	0.188566	0.167326	0.312309	0.0828987	0.033892	0.0192166	0.00650938	0.0528529
MA0762.1_ETV2	2.12075	3.62781	0.341396	-2.07995	3.10842	2.9412	-2.11588	-1.39408	-2.43761	-0.572319	0.245733	-0.329588	0.32788	-0.624901	-1.66122	-1.78432	-2.66247	0.672575	2.81832	1.76291	-1.17403	-2.63963	-2.39612	0.739998	0.188309	0.0123033	0.541654	0.11869	0.0135669	0.00952668	0.0249376	0.549867
MA0763.1_ETV3	5.00927	5.80759	4.97218	-3.5837	5.41523	3.27083	-5.3884	-3.03704	-3.86298	-3.62479	-1.73465	-0.721575	0.335158	0.941236	-1.3178	-0.610297	-0.940082	-0.623986	1.73343	1.35268	-1.68391	-1.23069	-2.32155	0.31935	0.159559	0.134782	0.141081	0.377351	0.155279	0.0554688	0.00464492	0.00835898
MA0764.1_ETV4	4.77208	5.73632	3.5305	-2.8561	3.82704	5.32676	-2.35155	-2.21169	-3.0155	-1.42209	-0.226758	-1.33004	-0.913066	-0.507383	-0.550218	-1.58631	-2.07381	-1.8965	-0.103122	0.453714	-1.9446	-2.27056	-2.04875	0.414442	0.206304	0.0360827	0.479874	0.0762527	0.198738	0.154532	0.00917123	0.296934
MA0765.1_ETV5	4.11076	6.97958	4.65609	-2.86278	4.24139	4.74141	-3.91061	-1.76238	-3.76269	-1.62456	-1.5619	-0.941244	-0.804249	-0.106128	-0.799472	-1.15811	-1.82233	-2.36114	0.219574	-0.42055	-1.6618	-2.47729	-2.66242	0.321569	0.161491	0.114469	0.0647802	0.152459	0.512826	0.202311	0.00601325	0.13353
MA0156.2_FEV	4.46795	6.31057	4.22394	-3.23046	4.52297	5.12192	-3.45455	-2.82895	-3.61359	-3.00266	-1.27808	-0.882375	0.142467	-0.582902	-0.939917	-1.87839	-2.30624	-0.177455	1.25908	0.720604	-1.6174	-2.78917	-2.21039	0.399829	0.1797	0.123659	0.183192	0.0239078	0.0127591	0.00727889	0.00587094	0.026432
MA0766.1_GATA5	-1.44353	-1.20655	-1.83931	-0.636425	-0.497789	0.959304	1.22095	0.131826	0.250616	1.7656	2.48379	1.41405	-1.3912	0.176405	1.49597	1.60118	-1.30647	-0.301682	0.193814	2.46705	-1.2564	-1.28075	-1.26051	0.0927571	0.39739	0.0446521	0.153403	0.977866	0.746471	0.137738	0.00455632	0.0362859
MA0767.1_GCM2	-1.14201	-1.98195	-1.14875	0.249104	0.788953	-0.179458	-0.63211	-1.3424	-1.9926	0.596667	0.353788	-0.716216	3.05808	1.41584	-0.104277	1.66161	-1.89208	0.00363843	3.461	2.53842	1.88387	0.840781	-4.51913	0.0123799	0.0337693	0.0677148	0.268764	0.534004	0.427657	0.328953	0.9291	0.109663
MA0768.1_LEF1	-2.29606	-2.7874	-2.12968	-0.603968	-1.10631	-0.631714	0.757788	0.910669	0.525928	0.156978	1.05737	0.599294	1.98376	-0.0949224	1.13465	0.0231859	-1.82077	-0.0624331	2.73548	3.56687	0.540194	0.943091	-1.66582	0.00356431	0.00253122	0.687131	0.586864	0.234396	0.131899	0.197863	0.00124989	0.991163
MA0770.1_HSF2	-1.17614	-1.02662	0.868105	-2.69707	0.742332	-1.68019	-1.51184	-1.72253	-1.53271	-0.598854	-1.40256	0.788548	2.8221	2.22734	1.59912	2.62179	3.04852	-2.38862	2.54674	-0.390624	2.02733	-0.524826	-1.25007	0.567355	0.747175	0.204217	0.0349519	0.232214	0.176775	0.931133	0.812941	0.0080482
MA0771.1_HSF4	-0.547367	-2.00121	-0.354249	-2.31124	1.11935	-1.88225	-1.07915	-1.06777	-2.00641	-0.689462	-0.999588	0.000279586	2.76004	2.78507	1.89569	1.4103	1.99321	-1.06166	3.64179	-0.328099	1.67735	1.31074	-1.61468	0.965088	0.775226	0.128192	0.00185324	0.166976	0.584396	0.879051	0.971027	0.00118487
MA0772.1_IRF7	0.336974	1.00275	1.48176	-3.45346	-0.715144	-1.00695	-0.414866	-0.617737	-1.14182	-1.12199	-1.15772	-1.18055	1.64248	0.597756	0.406794	1.69288	-1.23651	-2.72649	4.29724	3.96983	1.74475	0.530196	-2.05376	0.0769863	0.368752	0.185673	0.0335747	0.733211	0.593634	0.538043	0.490764	0.0275793
MA0052.3_MEF2A	-0.668263	1.31202	-0.418226	2.07541	1.18512	1.74375	1.32732	2.17813	0.675471	1.45252	0.685608	-0.648529	-1.11665	0.0482876	1.17361	-1.25596	-4.62885	-3.71895	-3.14435	5.21005	-3.15451	-4.7145	1.5286	0.109807	0.622863	0.305658	0.6361	0.301145	0.527263	0.677023	0.906518	0.0471709
MA0773.1_MEF2D	-1.19143	0.919439	-1.27795	2.4563	1.61463	1.40543	1.35603	2.10998	1.25703	2.10412	0.646936	-0.102628	-1.88198	-0.955636	1.14202	-1.08835	-4.53177	-2.85092	-1.80068	4.65316	-3.05617	-2.60407	-0.673238	0.0650037	0.582305	0.404977	0.266326	0.394464	0.405449	0.467786	0.449636	0.00945132
MA0498.2_MEIS1	-7.31668	-5.7467	-4.09794	-2.1747	-1.04491	-2.81114	0.823118	1.22981	0.118703	-0.406526	2.08967	1.96255	2.21915	2.63541	2.14987	3.02015	2.4664	1.20028	4.59048	4.38422	0.501552	0.116289	-1.65673	0.0372452	0.0161458	0.618464	0.300511	0.349988	0.618909	0.0551628	0.00256823	0.16806
MA0774.1_MEIS2	-4.43953	-3.56034	-2.50852	-3.3968	-1.24343	-2.99037	1.08388	1.41099	-0.69291	-0.648087	1.77857	0.266245	3.06349	2.13681	2.09681	2.31793	1.51391	0.403796	4.44841	4.10371	1.22585	0.717218	-1.48675	0.331132	0.0277022	0.895297	0.0918679	0.410473	0.501666	0.151689	0.000184729	0.0650961
MA0775.1_MEIS3	-5.81142	-4.40094	-3.43797	-0.607434	-0.98616	-1.84993	-0.014151	1.03472	0.0101351	-0.343858	1.93694	0.955167	1.32259	1.76601	1.27586	3.51079	1.98236	1.24122	4.29913	4.04035	0.211295	0.397814	-1.52612	0.0215689	0.0419418	0.545806	0.458295	0.33135	0.742969	0.0486742	0.00731487	0.106499
MA0776.1_MYBL1	-3.0438	-2.04873	-3.13344	2.54163	0.410959	-1.50047	-1.37597	-0.224203	1.22371	2.20567	1.45292	-0.90741	1.24913	2.64319	0.0796497	-0.0608969	-0.0981044	-0.157942	1.6794	2.11601	0.854213	-0.934133	-2.01745	0.099599	0.687025	0.436868	0.751495	0.198639	0.204767	0.156473	0.192233	0.901824
MA0777.1_MYBL2	-1.65574	-2.16825	-1.68718	0.289107	0.450768	-0.438361	0.58257	-1.75245	-1.10825	0.671688	1.18834	1.53936	0.34082	1.37913	1.72372	1.86446	-0.121627	0.394696	1.28437	0.941741	0.551943	1.02908	-2.86954	0.00684505	0.344949	0.0995814	0.977521	0.83071	0.998609	0.400421	0.166102	0.555109
MA0105.4_NFKB1	-1.71315	0.566462	-0.599985	-0.195578	-2.03353	-2.05277	-0.0646606	1.39872	1.6766	1.58639	3.23852	0.758052	-1.06745	1.52249	0.0721878	0.523744	-1.1754	-2.30721	0.468462	3.49949	-0.682305	-1.35043	-0.371021	0.401773	0.04213	0.402378	0.182356	0.694361	0.67399	0.505302	0.00318571	0.0373907
MA0778.1_NFKB2	-1.33333	0.607152	-0.354913	0.748777	-0.427816	-2.64827	0.162135	1.21932	0.492301	1.92229	2.62457	-0.113203	-0.387563	0.282196	-0.322029	0.368744	-2.45642	-1.16862	0.743743	3.15179	-0.120817	-0.719519	-1.24777	0.73924	0.292961	0.413728	0.180996	0.63789	0.392292	0.326965	0.0388876	0.0667467
MA0779.1_PAX1	-3.89929	-3.61372	-2.08486	0.417893	0.246295	-1.37454	0.192704	0.0450149	-0.930156	0.583379	2.82149	0.41374	0.311365	0.403442	0.27813	2.02483	-0.352096	2.06185	3.21756	4.9342	-0.822739	-0.579196	-1.28909	0.020962	0.993407	0.182627	0.348595	0.744032	0.219792	0.0295515	0.036578	0.606633
MA0780.1_PAX3	3.70055	4.10863	3.3589	-0.259904	1.58778	1.40086	-0.590962	-1.75862	-1.22366	-2.12699	-0.663649	-1.12935	-3.5682	-0.394521	-1.38138	-1.01009	-2.20665	-0.683356	1.09714	2.70186	-2.30933	-1.75085	-1.91959	0.029158	0.0490134	0.843801	0.67884	0.886362	0.105562	0.0862268	0.0024703	0.720926
MA0781.1_PAX9	-4.64133	-5.4263	-1.9995	-0.716896	-0.534628	-1.17716	-0.183094	0.756283	0.0855395	0.333333	1.66969	1.99944	0.798837	1.28325	0.441592	0.880789	-0.0783834	1.27661	3.43584	4.96585	-0.607366	-0.519897	-1.47624	0.0856228	0.0450853	0.14779	0.449614	0.521008	0.105781	0.0527891	0.011792	0.80315
MA0782.1_PKNOX1	-6.06653	-5.23315	-5.80357	-0.530068	0.177816	-3.238	-0.37951	1.59383	1.19474	-0.976731	2.75184	0.333432	2.25176	1.98443	2.99187	2.23517	1.41377	2.28794	6.74294	4.67457	-0.166293	0.598904	-2.1161	0.0431457	0.189094	0.940869	0.254956	0.366395	0.158672	0.0363674	0.0110708	0.160493
MA0783.1_PKNOX2	-6.69159	-5.24678	-6.09682	-0.171271	0.228322	-3.46401	1.09293	0.561261	1.01137	-0.60262	2.8759	0.268533	3.11823	1.21428	2.10371	2.25565	2.03271	1.84237	5.80724	4.8746	1.15632	-0.431295	-1.74495	0.0405744	0.223994	0.97229	0.351266	0.99844	0.231117	0.0424257	0.0131801	0.169007
MA0784.1_POU1F1	-4.09399	-0.305766	-1.99473	2.43897	1.73948	0.217189	0.721024	1.43776	1.14029	0.15594	1.1731	1.13629	-2.1704	-0.717172	0.316367	-0.846845	-2.67547	-0.462357	-0.351442	6.56791	-2.31709	-2.69004	0.157172	0.0605686	0.640417	0.52513	0.130887	0.512154	0.252619	0.264765	0.250277	0.101214
MA0785.1_POU2F1	-3.49339	-0.724909	-2.35286	1.86137	1.82133	0.256821	0.629348	-0.234927	0.122067	-0.766541	1.51338	2.14178	-1.0464	-0.0436596	-0.694749	-0.113343	-1.29606	-0.802821	0.524682	4.73894	-0.678027	-1.84889	-0.243144	0.0280924	0.15067	0.468986	0.213477	0.887481	0.321328	0.283384	0.345979	0.324199
MA0786.1_POU3F1	-3.5668	-1.8589	-2.76341	1.16485	1.25338	0.927233	1.22977	1.66382	0.674994	-0.869244	1.01542	0.938402	-0.817121	1.00746	0.141236	-0.677997	-1.32603	-0.355495	0.71939	4.7902	-0.878226	-2.92608	-0.0242841	0.0134444	0.824719	0.314638	0.772605	0.171367	0.2216	0.189478	0.145045	0.253506
MA0787.1_POU3F2	-2.98308	-1.76007	-2.14195	1.91279	0.961137	0.846846	1.40261	2.2233	0.739411	-0.49576	1.29659	1.22364	-0.215904	-0.296135	-0.0673275	-0.776594	-1.71854	-1.75682	-0.353014	4.59879	-1.05075	-2.08067	0.123589	0.00206197	0.715173	0.348095	0.275774	0.261992	0.395228	0.447097	0.120493	0.0508522
MA0788.1_POU3F3	-3.99493	-0.805416	-1.9641	2.04144	2.19514	0.856748	1.47393	1.09026	-0.694416	0.814186	1.42034	0.706756	-1.64018	0.53307	-1.42496	-0.674074	-2.72725	-0.122158	0.429692	6.61792	-0.411742	-2.68028	-1.82946	0.0349082	0.25771	0.654199	0.107389	0.563135	0.20136	0.202559	0.341587	0.191366
MA0789.1_POU3F4	-4.01326	-2.65346	-3.16138	3.60787	2.02278	2.33422	1.10863	0.848307	0.0644381	-1.66478	0.805649	2.80683	-0.264215	-0.400489	-0.295275	-0.137733	-0.329389	-0.26998	0.213382	4.35611	-1.05408	-1.74825	-0.44124	0.000834018	0.0338361	0.986794	0.531784	0.526061	0.373955	0.224419	0.532828	0.377502
MA0790.1_POU4F1	-0.529212	2.3231	1.21348	0.0840203	-0.278113	-1.8584	0.00622275	0.67707	1.7245	2.66402	1.3166	-0.210916	-1.66625	-1.0573	1.47797	-1.15996	-4.59021	0.227711	0.757245	7.92337	-3.19047	-3.51791	-3.67535	0.181474	0.13084	0.668926	0.260279	0.359715	0.14813	0.121744	0.269519	0.138663
MA0791.1_POU4F3	-0.507615	2.21166	-0.656407	1.70101	0.0167303	-0.46539	0.761576	1.00982	1.37611	0.641474	0.752979	1.22074	-0.59293	-1.63098	1.09816	-1.55862	-4.07777	-0.0850297	1.52454	7.69811	-3.89237	-3.41707	-3.46987	0.955459	0.440266	0.519701	0.2546	0.25524	0.122152	0.106885	0.316189	0.127362
MA0792.1_POU5F1B	-4.44831	-2.67365	-3.43623	3.33648	1.90224	1.97685	1.97367	1.27764	-0.10707	-1.29768	1.27619	1.82049	-1.02516	-0.00508134	-0.674651	0.383491	-0.570973	-0.00235805	0.294322	5.31751	-0.96416	-2.68952	0.748052	0.00107667	0.15735	0.717418	0.349071	0.496493	0.374638	0.243992	0.377301	0.358165
MA0793.1_POU6F2	-2.31352	-0.65485	-2.76905	1.83134	0.623941	1.42898	2.10063	1.58235	2.55564	0.383723	1.52327	0.669369	-3.14506	1.46646	-0.574572	-1.46905	-4.26008	0.401652	-0.808125	6.12865	-2.7143	-1.76978	-0.7374	0.0204764	0.161842	0.0532135	0.35086	0.365084	0.159031	0.225628	0.0782591	0.0333744
MA0794.1_PROX1	-2.30119	-2.84375	-3.17195	-0.759026	0.599299	0.178123	-0.347459	-2.10244	-2.75258	-1.7997	-1.37685	-0.380143	0.721531	1.75151	1.40278	1.73168	3.3185	1.13352	4.90202	2.36874	1.97961	0.662049	-2.42315	0.00708952	0.120786	0.553895	0.0111141	0.341712	0.852388	0.18812	0.922447	0.000384498
MA0600.2_RFX2	-1.35401	0.6332	-1.52678	0.225262	2.70893	0.158723	1.25622	0.440128	0.242105	-1.19159	-0.272606	0.9995	-1.46082	0.843683	2.0036	-2.48875	-2.80534	0.0276449	-0.522821	6.61277	-2.66226	-0.240099	-0.642443	0.179788	0.700988	0.342032	0.639119	0.0892886	0.177032	0.293319	0.888888	0.686166
MA0795.1_SMAD3	-4.84183	-3.95182	-2.20056	5.3925	-0.309795	-0.112709	1.21087	-0.393102	1.36293	2.21705	1.8611	3.28531	0.0584038	0.865782	1.48139	0.023864	-1.39965	1.59537	0.538001	2.55688	-1.66822	-1.60338	-1.76409	0.0884671	0.674301	0.0751832	0.0497977	0.234495	0.118821	0.0301723	0.149961	0.0420755
MA0796.1_TGIF1	-5.97202	-5.22185	-4.78792	-1.47588	1.18787	-2.72025	-0.907216	0.691307	0.647734	-0.556653	3.58372	-0.0277644	3.5688	0.795219	3.01501	1.626	2.11599	2.02145	5.37179	3.71601	0.678841	0.983293	-2.41752	0.0541764	0.436492	0.590419	0.408318	0.564916	0.193654	0.0538134	0.0194212	0.14937
MA0797.1_TGIF2	-5.35592	-4.39834	-4.93278	-1.12465	1.00043	-3.14967	-0.799111	0.576817	0.998342	-0.421608	1.02281	-0.329193	2.60792	1.50811	3.25771	2.10636	2.08485	1.81474	6.94264	3.08345	0.258363	0.593216	-1.83968	0.0796524	0.385414	0.826212	0.0270764	0.551569	0.352806	0.0910494	0.0246153	0.0236105
MA0798.1_RFX3	-1.33216	-0.132102	-2.05976	0.454763	2.24455	0.19807	1.34358	0.80636	0.16206	-1.61994	-0.261837	0.372838	-1.37875	0.107718	0.930577	-1.18235	-2.30963	-0.0935713	-0.134339	6.57664	-1.63407	-0.216387	-0.0302562	0.0675413	0.805986	0.15158	0.686483	0.163041	0.221401	0.343299	0.755182	0.927644
MA0799.1_RFX4	-2.27203	-0.440463	-1.84882	-0.177734	2.75411	1.07815	1.34417	-0.415165	0.210666	-0.394425	0.21516	-0.327217	-1.33973	1.05134	-0.258332	-1.1699	-3.08187	0.690221	0.715966	6.9679	-2.12548	-0.211927	-0.706661	0.0635321	0.455508	0.403354	0.98658	0.238771	0.132083	0.204247	0.76161	0.946492
MA0510.2_RFX5	-1.8605	0.0508438	-1.96867	0.144833	1.52669	-0.131818	0.748659	0.865063	-0.34948	-0.600375	0.330228	0.55715	-1.15424	0.0925854	0.644656	-1.70278	-2.23218	-0.54926	0.617386	5.15367	-0.567725	0.607123	0.218294	0.104328	0.893769	0.568452	0.734703	0.0601796	0.164032	0.443053	0.325197	0.809267
MA0511.2_RUNX2	-1.73115	-1.34702	-2.11975	-0.818039	1.26775	1.44391	-0.916238	-1.9426	-1.53865	-1.83112	-0.436248	-0.25661	-0.462729	1.70449	0.451695	-0.126996	1.18661	2.16482	4.42399	3.68287	0.648784	-2.43988	-1.92401	0.0719998	0.0861516	0.354658	0.15799	0.972311	0.0617859	0.0200541	0.413468	0.0133447
MA0800.1_EOMES	-1.86667	-2.52794	-0.0715226	1.68444	2.67373	2.61724	0.820583	-2.48855	-1.45207	-0.346228	-0.78597	0.563988	-2.76365	-0.142909	0.111306	-0.87689	0.312061	2.39093	3.19566	4.34587	-1.2032	-0.665212	-2.0614	0.0215774	0.0630844	0.486224	0.517132	0.594981	0.0299878	0.00379174	0.357303	0.324114
MA0801.1_MGA	-2.49347	-3.35435	-0.930548	1.66554	2.6039	1.90632	0.784092	-1.72197	-1.61603	0.141899	0.413652	0.0433281	-1.47308	1.11491	-0.567951	0.940084	1.12802	2.64767	1.02372	2.58552	-0.987872	-1.99596	-2.22342	0.0156879	0.0581775	0.327194	0.572878	0.217201	0.183175	0.00577203	0.845562	0.45369
MA0802.1_TBR1	-3.35585	-2.95418	-1.18455	1.54217	1.9226	1.93637	1.12018	-1.93288	-0.493678	-0.392624	0.857077	0.945283	-1.58202	-0.182598	0.778429	0.345839	1.04906	3.76583	4.07649	2.41541	-1.43447	-2.66051	-2.96544	0.0200912	0.123779	0.42648	0.389546	0.280724	0.0218595	0.00116507	0.752643	0.7264
MA0803.1_TBX15	-2.49347	-3.35435	-0.930548	1.66554	2.6039	1.90632	0.784092	-1.72197	-1.61603	0.141899	0.413652	0.0433281	-1.47308	1.11491	-0.567951	0.940084	1.12802	2.64767	1.02372	2.58552	-0.987872	-1.99596	-2.22342	0.0156879	0.0581775	0.327194	0.572878	0.217201	0.183175	0.00577203	0.845562	0.45369
MA0804.1_TBX19	-2.70913	-2.55019	-1.16927	-1.80289	1.11539	0.935227	-0.496917	-2.33237	-2.32391	0.216609	-0.166402	1.22589	-0.403179	0.61252	-0.0342684	1.22277	2.76755	2.70488	3.68457	5.47797	0.00986779	-1.96757	-2.23055	0.127386	0.196366	0.0512806	0.515791	0.207839	0.186719	0.00802641	0.67938	0.082303
MA0805.1_TBX1	-3.17213	-3.21373	-0.955543	0.147408	1.57456	0.751844	-0.915394	-0.426873	-2.36191	-0.738972	-0.677737	0.547885	-0.816661	-0.686211	0.286148	0.529249	2.44313	3.29329	2.75029	2.65367	0.349571	0.461247	-1.05512	0.0290716	0.0504752	0.263961	0.842151	0.271327	0.371221	0.0151938	0.958463	0.0146101
MA0806.1_TBX4	-3.03133	-4.05593	-2.43363	2.16661	2.48852	1.31665	0.473424	-2.26926	-1.86396	1.09933	1.03396	0.203994	-0.672865	0.952961	0.60875	0.0483969	2.1812	2.07851	2.05949	3.05274	-0.82342	-2.16021	-2.25177	0.00134764	0.0485948	0.13334	0.457114	0.581183	0.430825	0.00274339	0.787633	0.416502
MA0807.1_TBX5	-3.03133	-4.05593	-2.43363	2.16661	2.48852	1.31665	0.473424	-2.26926	-1.86396	1.09933	1.03396	0.203994	-0.672865	0.952961	0.60875	0.0483969	2.1812	2.07851	2.05949	3.05274	-0.82342	-2.16021	-2.25177	0.00134764	0.0485948	0.13334	0.457114	0.581183	0.430825	0.00274339	0.787633	0.416502
MA0808.1_TEAD3	-4.9837	-2.84838	-3.46429	3.35352	0.587913	1.66662	0.858185	1.50101	0.738802	1.05889	1.87837	-0.112345	-0.638983	0.358404	1.5258	0.254478	-2.2246	0.028848	1.561	2.72807	-2.27982	-1.4092	0.206495	0.00621681	0.410172	0.894429	0.569976	0.446342	0.252599	0.0720047	0.212306	0.0979481
MA0809.1_TEAD4	-1.90621	-0.780427	-2.52134	2.16244	1.14719	2.09455	-0.182245	-0.884486	-0.298812	0.846215	1.93945	-0.743957	-2.4119	0.500081	0.773044	0.137992	-1.77495	0.791126	1.88326	2.91659	-2.37611	-1.09924	-0.32785	0.00693693	0.00694922	0.279629	0.457992	0.775642	0.153256	0.0216683	0.934779	0.770096
MA0810.1_TFAP2A(var.2)	-2.47334	-1.59278	-2.61141	0.257542	0.352242	-2.1489	0.112838	0.340736	-0.31687	1.48654	2.18404	0.471081	-0.566242	1.08027	0.442999	2.79966	-1.09006	1.89755	3.47516	4.86821	-1.03458	-1.06609	-4.36902	0.160482	0.568768	0.10091	0.19923	0.829776	0.393608	0.0184551	0.0125445	0.885626
MA0003.3_TFAP2A	-0.852142	-1.24737	-1.22546	-1.0813	-0.678616	-0.291573	-1.31661	-0.840182	-0.330715	0.169199	1.83056	-0.0271453	0.301729	-0.13691	0.856713	0.0159592	-0.184699	1.44328	3.84156	7.93842	-0.330986	-2.62677	-4.2727	0.198756	0.711529	0.111251	0.662849	0.276162	0.140981	0.0480549	0.132843	0.514912
MA0811.1_TFAP2B	-2.31773	-1.88274	-2.86647	-0.0865993	0.370603	-1.92216	0.0468217	0.773194	0.0875501	1.81036	2.03794	0.59435	0.0867535	0.677742	0.685027	2.07719	-1.53173	1.36166	1.88754	5.57179	-1.00546	-0.576913	-2.52967	0.108139	0.350753	0.10159	0.142657	0.926186	0.35218	0.065207	0.00519359	0.710278
MA0812.1_TFAP2B(var.2)	-1.71918	-1.14425	-0.920778	-1.14764	0.220317	-0.627056	-1.41725	-1.12237	-0.653417	0.115313	2.06265	0.851436	0.8715	0.0869999	-0.0378908	0.339878	-0.385025	0.741901	4.28908	7.5236	-0.253983	-2.3037	-4.25739	0.200302	0.314056	0.0525412	0.350459	0.543035	0.160941	0.0599643	0.192088	0.568903
MA0813.1_TFAP2B(var.3)	-0.774436	-1.18561	-1.09698	0.574978	1.14476	-0.000702552	-1.57291	-1.74067	-2.85491	-0.398055	0.458628	-0.384965	0.718283	2.30063	-1.03656	0.630172	0.885927	0.267487	3.83791	3.10082	0.339881	-1.12386	-2.66362	0.0284496	0.00797322	0.0205304	0.51364	0.929162	0.269134	0.0662167	0.200309	0.0358292
MA0524.2_TFAP2C	-2.31065	-1.46721	-2.52719	-0.139747	0.742161	-2.75557	0.197278	0.473469	0.399996	1.89217	1.48522	0.20761	-0.253238	1.59638	0.219734	2.84948	-1.24728	1.3246	2.06392	5.31353	-0.523177	-0.650628	-3.04913	0.317434	0.413881	0.23844	0.421045	0.914247	0.483864	0.0509567	0.0111702	0.914952
MA0814.1_TFAP2C(var.2)	-2.4541	-2.3967	-1.3091	-1.47318	-0.732916	-0.977126	-1.78657	-0.283706	0.298393	0.952945	1.50598	0.28182	0.752165	0.472804	0.756264	1.04912	-0.37367	0.63634	3.7745	7.68319	0.795762	-2.14874	-3.02611	0.0988892	0.535995	0.121066	0.552997	0.728945	0.205967	0.0963412	0.013111	0.436096
MA0815.1_TFAP2C(var.3)	-0.743717	-0.971638	-0.922722	1.01795	1.13239	-0.101991	-1.51543	-2.24693	-2.42957	-0.268854	0.198199	-0.453907	0.0153109	1.98708	-0.949368	1.0368	0.898258	0.505286	4.5573	2.43444	0.414617	-0.846946	-2.86493	0.0541379	0.00641344	0.00716477	0.608003	0.549922	0.320653	0.0784063	0.118131	0.0301753
MA0464.2_BHLHE40	11.3888	19.5622	8.70496	3.03071	8.20617	13.4632	-3.74502	-3.89648	-2.71829	-5.01717	-4.81437	-4.22841	-7.09752	-3.8715	-4.86331	-7.4093	-5.40674	-2.66628	-4.40673	-3.4898	-8.05601	-5.98037	2.38659	0.324908	0.0584344	0.0583304	0.602917	0.482348	0.161304	0.920523	0.00115273	0.563062
MA0817.1_BHLHE23	-4.04207	-6.02242	-5.44565	-0.440936	0.90511	-0.801712	0.730165	-0.73259	-0.818974	0.123065	0.891939	1.41243	3.19617	0.94957	0.870356	0.840985	2.36849	2.1875	5.51115	2.98703	0.801284	-1.75624	-2.41609	0.00313938	0.834353	0.164925	0.386538	0.954657	0.218524	0.0288042	0.0576924	0.157913
MA0818.1_BHLHE22	-4.29645	-5.5376	-4.83775	0.479372	0.840389	-0.42834	1.16227	-0.504953	0.19265	0.379502	2.1918	0.974098	2.69274	-0.313065	2.24161	0.564302	0.788301	2.44925	4.53508	2.45181	-0.112478	-1.89237	-2.14747	0.000578642	0.983166	0.280655	0.759964	0.453716	0.0674551	0.00882858	0.0504918	0.695509
MA0819.1_CLOCK	-0.52586	4.65561	-1.22136	2.51851	3.56589	5.01201	0.945481	-1.25179	0.0592788	1.0628	1.67162	0.311576	-2.73392	-1.10088	-2.03654	-1.18481	-3.92214	-0.494342	-1.09082	1.37175	-4.4077	-4.89039	-0.148598	0.276756	0.0177416	0.230696	0.00917496	0.740154	0.280766	0.166869	0.153943	0.00520205
MA0820.1_FIGLA	-5.54574	-6.08534	-6.91196	0.933214	0.290717	-1.29663	1.44893	1.2084	1.10146	0.925385	1.30629	1.88641	1.12108	2.15285	2.20381	1.11259	0.307336	3.16488	2.9224	6.3916	-1.62628	-3.43478	-2.41942	0.00298679	0.191283	0.718974	0.373583	0.150188	0.0788343	0.0144442	0.0263141	0.792623
MA0821.1_HES5	1.11745	4.81429	1.19335	0.644584	2.75505	1.72826	-2.52048	-2.67815	-2.81408	1.6341	-0.778304	-0.84475	-0.192606	0.298867	-1.15727	-0.110967	-1.19673	-0.130937	1.81321	1.83459	-3.20781	-1.48076	-1.6458	0.659478	0.017285	0.0801778	0.726081	0.699916	0.122718	0.0192691	0.0050574	0.327066
MA0822.1_HES7	1.30029	3.29911	1.30654	0.876941	1.7358	1.7732	-2.69566	-2.57763	-2.13464	0.913214	-1.16347	-1.54719	-1.48979	-0.0233517	-1.10477	0.0388557	-2.05337	0.28023	1.64091	4.13882	-3.18176	-0.8385	-1.47186	0.540101	0.000980402	0.128123	0.775503	0.920613	0.150761	0.0550588	0.00085421	0.171261
MA0823.1_HEY1	5.07705	10.1591	3.32603	3.27937	6.71692	6.85225	-2.81272	-0.955736	-0.811351	-0.453695	-1.84407	-2.50442	-4.90881	-2.35999	-2.51323	-4.00033	-7.45839	-1.83231	-1.36369	0.898529	-6.64381	-4.91717	-0.0776578	0.823479	0.0116124	0.93718	0.186381	0.363806	0.164049	0.250524	0.000463977	0.087105
MA0824.1_ID4	-8.24205	-6.82017	-7.897	2.40416	0.787792	-1.01191	1.27659	0.805188	-0.211871	0.877578	3.15582	3.62191	0.498902	2.32501	0.908264	1.0973	1.05088	2.82844	4.59154	8.29804	-3.15434	-3.41171	-2.22451	0.00612078	0.930254	0.136661	0.27636	0.787798	0.122739	0.0316764	0.0472564	0.729765
MA0058.3_MAX	10.4473	20.9163	8.84031	2.33666	10.1788	13.94	-2.35923	-4.53069	-2.62287	-4.17126	-5.91951	-3.55239	-8.12433	-4.91797	-4.99747	-6.7923	-7.45735	-4.13376	-3.71705	-5.37254	-9.23214	-7.41021	0.581256	0.420215	0.0673229	0.234841	0.321744	0.406577	0.0200897	0.784743	0.00152758	0.0944975
MA0825.1_MNT	8.67332	15.8763	6.4887	3.69466	9.55482	12.435	-2.03317	-4.02765	-2.38601	-3.51175	-4.08383	-2.21093	-5.7756	-4.6202	-4.01921	-6.30014	-7.45798	-2.11591	-3.72137	-3.12522	-9.0658	-6.73216	0.22774	0.665574	0.0411245	0.6133	0.112588	0.093713	0.0267576	0.514124	0.0006536	0.0675969
MA0826.1_OLIG1	-4.72578	-6.7381	-4.90074	0.242736	1.08295	-0.195158	1.56354	-0.227936	-0.673862	1.42397	2.20276	1.50432	4.09322	0.289925	0.968514	0.561919	1.60735	2.65088	3.36478	3.36366	-0.7555	-1.642	-2.56012	0.0033642	0.853593	0.150282	0.956191	0.627886	0.113197	0.00465718	0.0479065	0.883059
MA0827.1_OLIG3	-5.34038	-7.39246	-4.54417	-0.248587	1.93466	-0.609129	0.247662	-1.00133	-0.397908	0.0264846	3.12903	2.24279	3.95286	0.565894	1.82907	1.27377	0.866368	2.25549	3.5112	1.94436	-0.122528	-0.508336	-2.54723	0.0063169	0.461451	0.12853	0.826447	0.401632	0.0745949	0.0211097	0.0716825	0.591867
MA0828.1_SREBF2(var.2)	6.08684	11.1921	5.77339	0.522095	5.01701	4.27862	-1.12681	-2.65093	-1.09065	-2.01067	-2.98937	-2.94923	-5.69338	-2.78471	-2.95398	-5.15238	-6.10685	-1.07469	-1.76274	-0.617828	-5.09857	-3.23462	3.45042	0.124044	0.0582253	0.178921	0.344248	0.190459	0.0170541	0.871988	0.00232519	0.467606
MA0522.2_TCF3	-6.20443	-5.83599	-6.02309	3.02834	-0.063449	-1.78999	1.40705	-0.0983327	-0.843575	2.3235	4.53326	2.24778	-1.03939	1.11256	1.7399	-0.175316	0.0304219	3.19271	3.63755	8.99176	-1.98737	-2.60673	-2.97879	0.0443543	0.889378	0.0458409	0.0981638	0.506353	0.102585	0.049607	0.038448	0.603584
MA0830.1_TCF4	-6.91413	-6.69774	-6.00299	3.14344	0.598328	-1.78713	1.75655	0.740297	-1.01549	2.64848	3.8008	2.58742	-0.207278	1.65309	1.56331	-0.0619425	0.543892	2.8603	3.57069	7.7673	-3.03271	-2.50336	-2.55651	0.0330888	0.929026	0.0707803	0.0591338	0.348227	0.0941526	0.0385206	0.0422643	0.467027
MA0831.1_TFE3	6.55707	12.6798	5.46966	1.88451	4.63302	6.27272	-1.04776	-2.43633	-2.50395	-1.95997	-2.61454	-2.55168	-5.58038	-2.6522	-2.36345	-4.567	-4.96125	-0.807762	-2.77643	-1.56203	-4.69404	-4.3826	2.89082	0.216819	0.0277398	0.521673	0.377438	0.353121	0.0246075	0.903027	0.00192081	0.402538
MA0833.1_ATF4	-3.76947	-1.18272	-4.54271	0.232927	-0.30658	-1.10804	-0.25649	0.228996	0.956327	-1.16319	1.7967	1.98006	0.394812	0.161768	-0.516907	-0.508433	-0.969681	1.46302	3.60448	3.31981	-2.25719	1.19046	2.05072	0.0979356	0.252193	0.645337	0.491932	0.128972	0.0251665	0.194255	0.0331457	0.862084
MA0834.1_ATF7	2.51084	6.0786	1.61704	0.743096	3.89467	2.83051	-2.77028	-0.656554	0.670076	-2.13461	-1.15128	-1.62511	-3.85214	-0.979553	0.302618	-4.25461	-3.27253	-0.385696	-1.12032	0.42115	-4.63237	-1.88515	4.28197	0.612838	0.0672323	0.552969	0.927981	0.202427	0.0224483	0.898421	0.00139288	0.898971
MA0835.1_BATF3	-0.591123	1.06207	-0.330238	-0.0851916	0.147663	1.6841	0.829398	0.510552	0.396444	-0.985248	0.187345	-1.38705	-1.68626	-0.930665	1.6313	-0.854876	-1.48109	-1.14717	0.753615	1.73151	-2.38724	-1.89697	2.80851	0.518163	0.995742	0.100531	0.743682	0.497057	0.189621	0.648963	0.464472	0.712897
MA0466.2_CEBPB	-1.37159	-3.17319	-3.39668	1.83438	1.21564	0.260826	-1.51102	-0.388302	-0.145338	1.31827	-0.155304	-0.381827	0.789247	0.6433	0.474271	-0.994121	-0.119468	2.42441	1.7085	4.19907	-1.41123	-1.79968	-0.324663	0.0113508	0.045767	0.241246	0.555994	0.2117	0.0317443	0.0161472	0.586536	0.284936
MA0836.1_CEBPD	-0.567904	-2.35178	-2.93769	1.90926	1.21014	0.0114932	-1.51112	-0.814597	0.134652	1.93013	-0.296693	-0.811653	0.295273	0.494057	0.347563	-1.3365	-0.788867	1.63024	2.01776	4.39577	-0.763866	-1.03181	-0.483773	0.0321228	0.073675	0.371801	0.912182	0.106505	0.0399441	0.053498	0.812021	0.364414
MA0837.1_CEBPE	-1.4986	-3.23431	-3.48865	2.06923	1.11531	0.367337	-1.52124	-0.241803	-0.213387	1.32108	-0.0330277	-0.391025	0.746635	0.592886	0.490491	-1.02394	-0.0113491	2.38595	1.66151	4.14855	-1.40501	-1.96039	-0.365928	0.0090204	0.0490378	0.232215	0.612628	0.26289	0.0360602	0.0153103	0.576137	0.327133
MA0838.1_CEBPG	-3.14617	-2.93175	-5.44044	2.28578	1.65881	-0.455507	-1.26248	-0.361004	1.01695	3.45445	0.962419	-0.311602	0.0413256	-0.440266	0.145868	-1.54049	-0.15389	1.54038	1.85077	4.56557	-2.72911	-1.8159	1.2239	0.0123394	0.270946	0.303652	0.31865	0.46256	0.059886	0.073227	0.209732	0.715853
MA0839.1_CREB3L1	-1.74905	0.190648	-1.54845	0.686098	-0.757819	0.936399	-1.96493	-2.81882	-1.30594	0.245187	0.031844	-0.984561	0.700911	-0.899998	-0.775912	-1.21584	0.854866	1.47321	6.12548	2.67058	2.09069	-1.4461	-0.793834	0.179684	0.0292807	0.0373473	0.896337	0.915109	0.129867	0.125195	0.282818	0.0347112
MA0841.1_NFE2	-5.05591	-4.37032	-5.84885	-0.225246	-0.331381	-0.528261	1.07291	0.380804	0.119176	1.41822	1.68862	0.440788	1.42732	1.71384	0.100799	0.571274	0.991643	1.99036	2.93619	3.54841	-0.0421562	0.658608	-1.04595	0.00624869	0.0783522	0.242376	0.87891	0.623067	0.0321477	0.0116697	0.0197149	0.521682
MA0842.1_NRL	-2.12928	-1.15956	-2.90975	-1.17935	-0.901738	-2.47856	-1.67795	-1.77691	-1.11318	0.228581	0.396698	-0.112296	0.806444	2.35474	1.66794	1.53881	1.43232	0.875169	5.39836	4.82781	0.216395	0.132675	-2.84982	0.479821	0.99614	0.00369514	0.0724514	0.808344	0.259587	0.0666173	0.0576892	0.0147334
MA0843.1_TEF	-1.7231	0.0158097	-1.69315	0.405658	-0.250132	1.58128	-0.772432	-0.843789	-0.753395	0.013159	1.87837	0.172125	-0.382708	-1.08454	0.19695	-1.09065	-0.383039	1.14303	1.23301	3.96617	-0.796708	-2.1589	1.18054	0.0951311	0.124707	0.131424	0.202609	0.587593	0.078522	0.113922	0.743316	0.746268
MA0844.1_XBP1	-2.00849	-0.773674	-1.752	0.933178	0.34628	0.417075	0.434537	-0.48244	-2.25781	-0.00494852	0.696606	-1.2157	-0.601211	1.4612	1.08434	-0.881313	-0.365433	0.697511	3.04911	2.65053	-1.95066	-1.23484	1.04498	0.0169103	0.229647	0.576059	0.386136	0.17519	0.0513585	0.0729604	0.998488	0.185276
MA0845.1_FOXB1	-3.86609	-3.9789	-3.36614	1.54362	0.449163	-0.135079	1.39787	0.17412	1.00167	0.208178	3.41423	1.4246	-0.149488	0.315908	-2.80357	1.10337	-0.0328669	1.69876	2.20604	8.09486	-1.94288	-2.7332	-1.19326	0.00640285	0.717257	0.479509	0.130331	0.300056	0.229422	0.0949691	0.0376239	0.424705
MA0032.2_FOXC1	-3.94726	-3.51351	-3.77535	1.44129	0.378315	-0.795567	1.59229	1.46482	1.18426	0.414391	4.36945	1.73699	-0.769364	0.105317	-2.46201	1.6946	-1.30764	1.99078	1.08258	10.0366	-3.08277	-2.44502	-0.188209	0.0208301	0.236201	0.581059	0.0919936	0.558656	0.28989	0.149063	0.013482	0.280485
MA0846.1_FOXC2	-3.43131	-2.61687	-2.86777	0.802838	1.75181	-0.241179	1.54548	0.822947	1.92949	1.06512	4.00814	0.676528	-0.317527	0.454885	0.0287489	0.0462284	-2.9805	-1.02139	2.20309	8.90091	-2.02934	-3.56122	-0.303251	0.0127002	0.387209	0.696966	0.215147	0.495911	0.244421	0.203117	0.0259541	0.190883
MA0847.1_FOXD2	-6.15911	-3.5613	-5.0437	3.57088	0.981817	1.41338	-0.867786	0.334198	0.591734	1.6732	1.61174	4.14173	-0.171917	1.28454	0.0146999	-0.582441	-2.42316	3.80741	2.42009	5.87543	-2.45367	-1.20893	-0.150425	0.00330929	0.117152	0.0788157	0.111187	0.248319	0.0303979	0.0158969	0.169163	0.533736
MA0848.1_FOXO4	-6.15911	-3.5613	-5.0437	3.57088	0.981817	1.41338	-0.867786	0.334198	0.591734	1.6732	1.61174	4.14173	-0.171917	1.28454	0.0146999	-0.582441	-2.42316	3.80741	2.42009	5.87543	-2.45367	-1.20893	-0.150425	0.00330929	0.117152	0.0788157	0.111187	0.248319	0.0303979	0.0158969	0.169163	0.533736
MA0849.1_FOXO6	-6.15911	-3.5613	-5.0437	3.57088	0.981817	1.41338	-0.867786	0.334198	0.591734	1.6732	1.61174	4.14173	-0.171917	1.28454	0.0146999	-0.582441	-2.42316	3.80741	2.42009	5.87543	-2.45367	-1.20893	-0.150425	0.00330929	0.117152	0.0788157	0.111187	0.248319	0.0303979	0.0158969	0.169163	0.533736
MA0850.1_FOXP3	-6.15911	-3.5613	-5.0437	3.57088	0.981817	1.41338	-0.867786	0.334198	0.591734	1.6732	1.61174	4.14173	-0.171917	1.28454	0.0146999	-0.582441	-2.42316	3.80741	2.42009	5.87543	-2.45367	-1.20893	-0.150425	0.00330929	0.117152	0.0788157	0.111187	0.248319	0.0303979	0.0158969	0.169163	0.533736
MA0855.1_RXRB	-2.31551	-1.63308	-2.74362	0.458901	-0.629672	-1.96344	1.75164	-1.9117	-2.28453	-1.35531	0.674621	1.71983	2.33496	2.04908	2.57822	2.07866	0.29208	0.42326	2.57271	0.826203	-0.605818	1.717	-2.31312	0.149527	0.948058	0.505696	0.156858	0.41998	0.94337	0.296379	0.200867	0.168952
MA0856.1_RXRG	-2.18679	-1.575	-2.8154	1.15176	-0.704187	-1.96519	1.43736	-1.60923	-2.82164	-1.47994	1.27912	1.20886	2.47899	1.88713	2.23659	1.83211	-0.168842	0.79846	2.86636	1.22968	-0.624076	1.77562	-1.86473	0.195075	0.769401	0.445013	0.172557	0.396773	0.574806	0.222306	0.311806	0.131915
MA0525.2_TP63	-3.59473	-5.74926	-5.20928	1.76529	1.53487	-0.9163	2.20674	0.559056	0.810694	5.58887	5.40926	4.08994	-3.13723	-1.68897	-1.9156	-1.92123	-3.30695	2.81924	-2.19674	9.56051	-1.96698	-3.15016	2.1173	0.00767006	0.715389	0.00541409	0.000372618	0.703363	0.21659	0.331426	0.0120642	0.0308048
MA0106.3_TP53	-8.37499	-9.92273	-9.0609	3.89018	-0.0220077	-2.18878	5.38727	2.68462	2.54751	6.76858	9.13152	6.14635	-3.11438	-2.04703	-0.590347	-1.90213	-5.32316	2.80447	-2.78584	11.1782	-5.01336	-3.20372	1.32999	0.0262788	0.233644	0.042518	0.00163909	0.493274	0.207343	0.27578	0.00655547	0.00275655
MA0861.1_TP73	-6.5078	-7.84517	-7.48448	3.08007	1.15715	-1.21965	6.53876	1.76822	1.78799	5.76158	8.41819	7.15885	-3.43891	-2.81843	0.377083	-3.17754	-6.17873	2.33815	-3.48396	10.2231	-4.82476	-3.23924	2.54097	0.0148222	0.310326	0.126989	0.00499333	0.279942	0.184924	0.360559	0.0057982	0.0035537
MA0862.1_GMEB2	0.0548793	0.469213	0.277791	-0.942676	0.116128	-1.51433	-2.06944	0.0325133	0.0690983	0.36621	0.0864715	0.433121	0.359775	1.03397	-1.10243	0.263687	0.356517	0.973272	2.19932	2.70221	0.836496	-1.74976	-2.97495	0.152867	0.892082	0.309837	0.784544	0.767969	0.0837063	0.0838248	0.882236	0.492508
MA0863.1_MTF1	-2.15711	-2.11103	-2.12556	-0.0133593	0.261108	0.769546	0.36084	0.185447	-0.513846	1.41434	0.0110456	0.592667	0.63698	-1.46339	-0.317407	0.087258	0.50726	2.37267	3.43671	6.20998	-2.41831	-1.77193	-0.829946	0.00833317	0.405066	0.256016	0.232563	0.384199	0.0789483	0.0254447	0.0857173	0.768186
MA0024.3_E2F1	2.43153	3.81162	1.48603	-0.203941	3.02744	5.06172	-0.896969	-1.3112	-1.02575	-1.31013	-1.84623	-0.384265	-3.64346	-0.0543646	-0.131035	-2.38098	-2.84707	-0.992383	0.39153	-0.528295	-1.20511	-0.905518	-1.02467	0.977347	0.135963	0.83666	0.944806	0.376007	0.0188084	0.238718	0.00339341	0.850615
MA0864.1_E2F2	5.92511	9.50591	10.2808	-2.4165	1.0884	1.09914	-1.48143	-2.20191	-1.77118	-1.46213	-3.43073	-2.25613	-0.00455882	-0.898096	-2.35589	-0.000246761	-3.28144	-2.41928	1.53007	2.96313	-1.1767	-1.84264	-6.08074	0.00868577	0.273303	0.433456	0.222067	0.796161	0.394246	0.169532	0.0284483	0.293627
MA0865.1_E2F8	3.86071	5.1947	3.87647	-3.49313	1.44171	2.03204	-1.22068	-1.22061	-2.62346	-0.447605	-1.92582	-3.17724	-0.0172169	-0.0514124	-0.902658	-0.127544	-3.25874	-2.03404	0.921338	4.00787	1.08262	-0.969869	-3.41154	0.125187	0.440885	0.870246	0.183756	0.540178	0.343403	0.40029	0.0249721	0.0974866
MA0866.1_SOX21	-6.15312	-4.04203	-3.8614	1.51199	-1.03785	-3.52309	-0.376137	-0.664956	-0.867134	0.281916	1.83307	1.50357	0.864074	2.59728	1.28459	2.50009	2.44348	0.524962	5.58111	7.19631	-1.18429	0.697946	-1.85131	0.110858	0.81854	0.0497502	0.621848	0.230093	0.431778	0.108223	0.0350361	0.10797
MA0867.1_SOX4	-4.77434	-3.76943	-2.831	0.539793	0.604086	-2.26621	0.504872	-0.330998	1.41473	-0.0118347	2.11731	1.46565	1.43598	2.2145	1.19344	1.83312	1.47857	-0.195356	2.75662	3.56606	0.284244	-1.31805	-2.29116	0.0475953	0.460269	0.46076	0.589091	0.915238	0.768722	0.093013	0.0214244	0.838
MA0868.1_SOX8	-6.32844	-5.44345	-5.16075	0.344576	0.236284	-0.523948	1.1002	1.2891	0.824423	0.339411	3.39008	3.81338	0.12974	1.74648	2.44699	2.0506	-1.0376	1.64291	2.32	4.92782	-1.66987	-3.34589	-1.76958	0.000311167	0.0425769	0.317496	0.460922	0.655188	0.322226	0.0183417	0.0137202	0.253286
MA0871.1_TFEC	3.50239	8.90036	3.53108	1.14885	3.25807	2.69818	-0.802482	-1.38013	-1.00835	0.061294	-1.49426	-2.08577	-4.28469	-1.54264	-3.57763	-3.28363	-3.62209	-0.583859	-1.11114	-0.989926	-4.30025	-3.61215	3.27447	0.237578	0.0256507	0.882462	0.137051	0.738788	0.00320852	0.813211	0.00481269	0.190154
MA0872.1_TFAP2A(var.3)	-0.798142	-1.53498	-1.58348	1.16752	1.23319	-0.546883	-1.85767	-1.28347	-1.69321	0.00058412	0.565616	-0.435558	-0.154977	2.81165	-1.67283	0.279837	1.45329	0.202619	3.88547	3.06185	0.682405	-0.830113	-3.11722	0.0636444	0.0523814	0.0134052	0.850948	0.736426	0.319993	0.09152	0.515997	0.08506
MA0028.2_ELK1	4.2216	6.93409	4.3287	-4.0016	3.2406	3.09075	-3.48363	-1.97858	-3.52986	-4.62345	-1.13612	-1.34787	-0.135146	0.595976	-1.71513	-1.92468	-2.54368	-0.03751	0.563574	1.50353	-0.660406	-1.66906	-2.41721	0.200107	0.252284	0.649431	0.227845	0.103949	0.0128431	0.0298126	0.0113007	0.0212476
MA0873.1_HOXD12	3.02349	2.20555	3.64845	-1.63263	-0.0380488	0.116754	-1.78691	-0.499814	-2.94407	-1.32708	-2.33445	-3.3425	0.106185	0.512103	-1.69171	0.0882326	-0.534309	-1.12458	1.64719	4.63203	1.31088	1.04807	-2.39743	0.0092584	0.248614	0.554596	0.0927224	0.869234	0.36321	0.449857	0.00952174	0.0048852
MA0875.1_BARX1	-3.08643	-2.25284	-3.05162	-0.562268	0.862959	1.4556	-1.14648	0.176284	-2.44187	0.185075	-0.140523	0.79179	2.10337	0.372798	-1.21125	2.35141	0.591367	2.09474	3.67777	6.27198	-2.74603	-1.06662	-1.24457	0.0169503	0.152274	0.193707	0.89738	0.482288	0.189067	0.0279387	0.493005	0.137225
MA0876.1_BSX	-1.53774	-1.11636	0.0790982	-0.109382	2.85344	0.0417413	-2.53264	-2.72508	-1.48132	-0.224391	-0.137424	0.657851	1.92931	0.345687	0.801673	0.616011	0.107489	0.781169	3.12526	3.33465	-0.0804763	0.0653749	-2.82524	0.197589	0.0653975	0.0100694	0.181943	0.306941	0.119652	0.0554265	0.218629	0.0334432
MA0878.1_CDX1	3.96734	2.20167	2.80363	-3.04743	0.121186	-2.38682	-2.24168	-2.1006	-2.86503	1.67417	-0.163514	-1.74605	-0.965212	-0.150986	-1.85487	2.76065	-2.19925	-1.04327	4.45598	3.49827	0.946951	0.225356	-4.67731	0.0215144	0.583932	0.136486	0.470593	0.698425	0.571934	0.22939	0.210384	0.231867
MA0882.1_DLX6	-0.830972	0.790398	-0.426899	1.55434	1.49419	1.36306	0.570213	-0.664727	-0.994872	0.488218	1.58286	1.74206	-1.64793	-0.203993	-0.847142	-1.64285	-2.83005	1.00389	2.05994	6.06998	-2.88127	-3.88556	-2.76028	0.0773493	0.0594433	0.0594492	0.0195518	0.20741	0.0627976	0.0500402	0.751512	0.262265
MA0884.1_DUXA	-3.63583	-1.59593	-2.35423	1.55256	-0.485252	-0.689183	1.65898	1.13497	0.0612045	2.19778	3.73435	2.50673	0.93125	1.22061	0.349104	0.801293	-2.3949	-1.65414	0.691296	3.9847	-2.60418	-2.85696	-2.05209	0.0481224	0.39747	0.0487284	0.03246	0.49101	0.493367	0.162334	0.00700145	0.0172815
MA0886.1_EMX2	0.885781	3.6744	3.11359	2.23361	2.5793	1.82021	0.158249	0.503395	-1.2317	0.550247	0.0813094	-0.245153	-0.808291	-1.2558	-1.98764	-2.14345	-4.13122	-0.556454	-1.54198	5.53168	-3.82316	-2.69832	-1.92831	0.727347	0.0312682	0.623309	0.0291363	0.300333	0.186804	0.210444	0.000802465	0.120009
MA0887.1_EVX1	-3.035	-1.56765	-2.43623	5.02346	1.49134	1.14931	0.430577	1.46143	-0.170067	1.31492	2.02073	0.347809	-2.29345	0.228602	1.86126	-0.612954	-4.40636	0.921182	-1.78937	5.32385	-2.55406	-3.83596	-0.97195	0.0462224	0.2464	0.390601	0.402321	0.400089	0.25595	0.188806	0.559829	0.092715
MA0888.1_EVX2	-2.446	-1.47316	-2.16423	2.74013	2.10123	2.12276	2.6171	1.25562	-0.432061	0.498006	2.75993	-0.412244	-2.0686	-1.42556	1.36096	-0.306501	-1.80591	1.19405	-1.36459	3.28629	-2.90505	-2.83721	-1.68752	0.000437029	0.313159	0.885391	0.306104	0.806711	0.270351	0.110704	0.453084	0.0450465
MA0889.1_GBX1	-1.40288	-1.9656	0.568334	3.47716	2.87096	3.71174	1.32359	0.226559	-0.279052	0.142735	2.46662	-0.0887295	-0.374969	-1.43052	-0.647089	-2.6593	-2.78193	1.96948	-0.15726	3.79107	-3.67327	-2.71568	-1.65272	0.0220331	0.0115831	0.686854	0.168965	0.0232391	0.0562381	0.0385346	0.619798	0.0679665
MA0890.1_GBX2	-1.76765	-1.13546	-0.958734	3.79283	1.84271	0.977553	0.796541	0.0376007	0.183712	0.238929	1.05953	1.23323	-0.195073	-1.49864	-0.331028	-1.63581	-1.07743	0.208339	1.17117	3.72761	-0.873807	-3.63269	-2.02298	0.0431312	0.146334	0.264642	0.0464587	0.265533	0.0922743	0.0461893	0.887181	0.0823533
MA0891.1_GSC2	-3.23479	-1.87924	-0.792947	0.102888	-1.04345	-1.29132	2.09521	0.258497	-0.833503	-0.592074	3.80105	0.589538	1.1857	0.188364	1.13148	0.200747	0.317879	-1.71923	2.9589	1.44331	0.287601	-1.24481	-1.01927	0.226894	0.283536	0.657003	0.777156	0.214572	0.690306	0.379696	0.0290058	0.526069
MA0892.1_GSX1	2.17874	5.43701	1.9261	0.197428	1.87522	3.46295	0.203151	-2.08334	-1.79973	-0.182365	-0.642078	-0.576428	-2.19018	-0.624615	-1.68924	-1.19308	-4.13869	-1.34415	0.799909	3.60816	-3.33727	-2.42378	-1.52913	0.417169	0.0648878	0.402369	0.14492	0.570613	0.183977	0.125469	0.00381092	0.562868
MA0893.1_GSX2	1.19914	2.99811	1.65881	0.62885	1.13058	3.08276	1.31564	-3.13092	-1.82883	-0.494638	-0.0670653	0.955929	-1.92099	0.462638	-2.1006	-0.476911	-2.54811	-1.5315	1.52551	2.32732	-1.86452	-1.69297	-3.54956	0.734469	0.154303	0.418867	0.251782	0.826369	0.24477	0.0983206	0.0198917	0.58625
MA0894.1_HESX1	3.62018	6.63446	3.15325	-0.167462	2.20903	3.19959	0.219702	-1.27278	-1.44697	-0.855735	-0.182621	-1.44717	-3.58674	-0.990923	-2.45615	-0.55051	-3.40555	0.575949	-0.0985921	2.61235	-3.41477	-3.20112	-2.90537	0.140108	0.105525	0.994393	0.170538	0.846283	0.233091	0.0321198	0.00583007	0.287198
MA0895.1_HMBOX1	-2.90924	-1.25662	-3.92072	0.576917	0.72487	2.77407	1.59161	0.263954	0.318621	1.4575	1.21002	0.640467	0.000537572	0.505569	2.13421	-0.465419	0.219001	2.03941	-0.0703705	1.79283	-1.8867	-1.84582	-1.6268	0.0184943	0.496311	0.499818	0.770875	0.267344	0.169532	0.0429987	0.186074	0.118659
MA0899.1_HOXA10	1.95443	2.18613	1.8895	-2.39039	0.164546	-2.56515	-2.89209	-0.416624	-0.3762	-0.570297	-0.50801	0.585459	-0.385294	0.0809515	-0.973658	1.69756	-2.13476	-1.19035	5.02859	6.42132	0.223321	-0.504236	-6.54053	0.0535679	0.776306	0.333866	0.618299	0.931558	0.316858	0.147778	0.401319	0.468629
MA0900.1_HOXA2	1.35394	1.09992	1.54561	2.95442	3.13236	3.57043	0.991471	-1.33872	-1.51771	0.127671	-0.189233	-0.586556	-2.04653	-1.09459	-0.553094	-1.40001	-2.6766	-0.0288528	-0.616522	3.61048	-2.09838	-2.80961	-2.70033	0.00171749	0.0360399	0.669915	0.130915	0.409067	0.13976	0.112826	0.000937566	0.309293
MA0901.1_HOXB13	-1.0696	-0.178219	-0.304666	-0.489777	2.45621	0.689711	-0.796676	-0.871536	-0.823081	-1.37765	0.897088	0.256218	-0.222062	0.443885	0.23009	1.35168	-0.624386	-0.597515	3.26939	4.69319	-1.04422	-1.70811	-4.46513	0.237974	0.182834	0.380566	0.775588	0.865339	0.344488	0.0717108	0.329804	0.492388
MA0902.1_HOXB2	1.15682	2.64697	1.34227	1.5198	1.5184	1.02176	0.78768	-2.43872	-0.22	-0.288567	-0.555277	0.332871	-1.87687	0.214076	-0.890566	-1.24238	-2.10652	-0.157298	1.61808	4.04599	-2.40478	-2.24196	-3.15436	0.528949	0.170352	0.686245	0.384042	0.348437	0.0905802	0.0612199	0.00605916	0.661063
MA0903.1_HOXB3	0.66176	2.6389	0.72422	2.55659	1.6523	1.3897	1.4222	-1.6856	0.127843	-0.130588	0.174862	-0.0317032	-2.73895	0.367146	-1.08212	-0.937895	-2.39773	-0.813138	1.33522	3.94719	-2.04584	-2.17674	-3.88263	0.527566	0.15677	0.961398	0.326419	0.686008	0.141072	0.0762109	0.0129343	0.248887
MA0905.1_HOXC10	1.85796	2.70632	1.94185	-1.92205	0.775136	-0.157671	-0.880138	-1.67326	-2.21118	-0.908628	-0.787959	-1.12604	0.592997	-0.0416234	-2.76522	0.483394	0.753201	-0.0471051	1.26154	5.77368	0.973867	0.886606	-3.15984	0.0685229	0.284123	0.231832	0.862357	0.318044	0.434288	0.286891	0.0260405	0.0396908
MA0906.1_HOXC12	2.01272	1.77421	1.79958	-1.54543	0.94437	0.937236	-1.96005	-1.88445	-3.49923	-1.47377	-1.95225	-1.40353	0.357805	0.788803	-2.75018	1.43266	0.591336	-0.858424	2.95835	3.98232	0.98992	0.332612	-1.30638	0.168088	0.0704977	0.24778	0.437102	0.300777	0.567461	0.306355	0.00129484	0.00109194
MA0907.1_HOXC13	1.43569	1.14852	1.4772	-1.11337	0.000348137	-0.170652	-1.09549	-0.945457	-1.73009	-0.478581	0.363244	-1.0873	0.503111	0.732555	-0.900822	-0.490254	-0.528367	-0.586338	3.18004	1.70025	0.0481956	1.28299	-2.1068	0.0276291	0.129227	0.17008	0.483182	0.347927	0.218479	0.316963	0.0349103	0.0551364
MA0908.1_HOXD11	1.81171	2.81664	2.8309	-2.59497	0.755024	0.449843	-1.68924	-1.4173	-2.02961	-0.466045	-4.33668	-1.0639	0.155886	0.473919	-3.01058	1.0065	0.577478	-0.444489	2.15832	5.28959	1.28916	-0.0709834	-2.49946	0.0990364	0.363156	0.859121	0.517581	0.288657	0.450813	0.247977	0.0193158	0.0187378
MA0909.1_HOXD13	3.20215	1.8747	3.36654	-2.2589	0.84011	-0.791147	-3.06712	-2.60263	-2.21612	0.0775203	-1.11687	-1.5401	0.532606	1.17559	-1.10393	2.47516	-2.14234	-1.01754	4.92096	4.76081	1.19671	-1.32703	-7.85878	0.0385404	0.16148	0.0480088	0.278674	0.990459	0.450879	0.177849	0.0283723	0.129007
MA0914.1_ISL2	-3.00633	-1.38711	-1.9387	-1.18748	-0.707708	0.188205	-2.83868	-1.7656	-3.04193	-0.578332	0.427224	-0.84464	2.10718	1.42731	2.11808	1.76091	2.14592	1.08445	4.38366	4.78493	1.58998	0.749182	-2.89594	0.0703367	0.0248277	0.0161114	0.0133123	0.832086	0.337583	0.118883	0.890354	0.00159155

## Sheet: Supplemental Table S6
Supplemental Table S6. Top de novo motifs (8-mers) enriched in Amphimedon broad developmental stages (early, mid and late).
Stage	Sequence	p_value	p_value_adjusted
Early	GAGATCCC	2.09848e-10	6.90316e-06
	CTATGGGA	5.20616e-09	8.56309e-05
	CAAGTTGA	1.48634e-08	0.000162982
	CTGGTACC	3.572e-08	0.000293761
	ACGGCTCG	6.1952e-08	0.000364804
	AGATGATC	6.65376e-08	0.000364804
Mid	GGAGAGGA	2.46997e-08	0.000432175
	ACATACAC	3.56629e-08	0.000432175
	GGAGGTTA	5.15937e-08	0.000432175
	AGTCCCTC	1.10259e-07	0.000432175
	ACACATAC	1.27873e-07	0.000432175
	GTATATAC	1.306e-07	0.000432175
Late	GACTTTAA	3.41437e-07	0.00966628
	AATGTTGC	8.76679e-07	0.00966628
	GTGACCTA	1.10233e-06	0.00966628
	ATCTGGAG	1.28741e-06	0.00966628
	GGTTGAAA	1.46922e-06	0.00966628
	GTTAGAGA	2.12103e-06	0.0108951

## Sheet: Supplemental Table S7
Supplemental Table S7. Similarity of Amphimedon 8-mers and known PMWs from JASPAR database.
Query_ID	Target_ID	Optimal_offset	p.value	E.value	q.value	Overlap	Query_consensus	Target_consensus	Orientation	Target_Name	Target_Species	Target_Class	Target_Family	Target_Logo
8-mer.e2	MA0752.1	5	5.8383e-05	0.0960984	0.192197	8	CTATGGGA	GAGTATTATGGGATGGA	-	ZNF410	Homo sapiens	C2H2 zinc finger factors	More than 3 adjacent zinc finger factors	NA
8-mer.e3	MA0961.1	1	0.000148063	0.243712	0.162471	8	CAAGTTGA	GCAAGTGGC	-	BHLH112	Oryza sativa Japonica Group	Basic helix-loop-helix factors (bHLH)		NA
8-mer.e3	MA1357.1	2	3.58183e-05	0.0589568	0.075109	8	CAAGTTGA	TGCAAGTTGCA	+	bHLH80	Arabidopsis thaliana	Basic helix-loop-helix factors (bHLH)		NA
8-mer.m6	MA0379.1	-2	6.97621e-05	0.114828	0.114828	5	GTATATAC	ATATA	+	MOT2	Saccharomyces cerevisiae	RING-type zinc finger		NA
8-mer.l2	MA0262.1	0	8.124e-07	0.00133721	0.00267442	8	AATGTTGC	AATGTTGCGAATT	+	mab-3	Caenorhabditis elegans	DM-type intertwined zinc finger factors		NA
8-mer.l3	MA0014.3	4	0.00138975	2.28754	0.194623	8	GTGACCTA	GAGCGTGACCCC	+	PAX5	Homo sapiens	Paired box factors	Paired domain only	NA
8-mer.l3	MA0016.1	2	0.00502318	8.26815	0.305271	8	GTGACCTA	CCGTGACCCC	-	usp	Drosophila melanogaster	Nuclear receptors with C4 zinc fingers		NA
8-mer.l4	MA0698.1	4	0.000302937	0.498634	0.498634	8	ATCTGGAG	GAACATCTGGATG	-	ZBTB18	Homo sapiens	C2H2 zinc finger factors	More than 3 adjacent zinc finger factors	NA
8-mer.l4	MA1579.1	5	0.000247683	0.407685	0.498634	8	ATCTGGAG	ATCTTTTCTGGAGTA	-	ZBTB26	Homo sapiens	C2H2 zinc finger factors	More than 3 adjacent zinc finger factors	NA
Top 2 hits are shown when multiple matches were found.

## Sheet: Supplemental Table S8
Supplemental Table S8. Pairwise synergy of top 10 motifs enriched in every broad Amphimedon developmental stage.
Early stage
	MA0058.3_MAX	MA0685.1_SP4	MA0464.2_BHLHE40	MA0825.1_MNT	MA0664.1_MLXIPL	MA0657.1_KLF13	MA0740.1_KLF14	MA0663.1_MLX	MA0746.1_SP3	MA0636.1_BHLHE41
MA0058.3_MAX	0	6.51461	0.341544	-0.3391	0.300973	7.77278	4.71468	1.81409	6.40601	1.15694
MA0685.1_SP4	6.51461	0	11.5873	12.1247	9.69318	4.68999	4.19302	11.3398	10.3118	9.54512
MA0464.2_BHLHE40	0.341544	11.5873	0	-0.46793	1.65073	6.28576	4.12364	1.40125	5.27921	0.817178
MA0825.1_MNT	-0.3391	12.1247	-0.46793	0	1.89175	7.61038	6.93623	3.39154	6.84078	1.70378
MA0664.1_MLXIPL	0.300973	9.69318	1.65073	1.89175	0	5.79757	5.87781	5.24065	5.87743	4.695
MA0657.1_KLF13	7.77278	4.68999	6.28576	7.61038	5.79757	0	8.57969	9.24731	5.87114	8.58465
MA0740.1_KLF14	4.71468	4.19302	4.12364	6.93623	5.87781	8.57969	0	7.84827	5.60605	6.93402
MA0663.1_MLX	1.81409	11.3398	1.40125	3.39154	5.24065	9.24731	7.84827	0	3.48711	3.69537
MA0746.1_SP3	6.40601	10.3118	5.27921	6.84078	5.87743	5.87114	5.60605	3.48711	0	8.97578
MA0636.1_BHLHE41	1.15694	9.54512	0.817178	1.70378	4.695	8.58465	6.93402	3.69537	8.97578	0
Mid stage
	MA0106.3_TP53	MA0861.1_TP73	MA0646.1_GCM1	MA0610.1_DMRT3	MA0528.1_ZNF263	MA0727.1_NR3C2	MA0113.3_NR3C1	MA0471.1_E2F6	MA0081.1_SPIB	MA0712.1_OTX2
MA0106.3_TP53	0	4.60849	2.00985	2.05217	2.09432	2.29841	2.80469	0.452276	1.98799	-0.0232813
MA0861.1_TP73	4.60849	0	1.76059	1.99074	1.41893	6.35066	4.68573	1.51879	2.14011	0.164725
MA0646.1_GCM1	2.00985	1.76059	0	2.16223	0.504224	1.5869	2.22376	0.697087	0.829214	1.24192
MA0610.1_DMRT3	2.05217	1.99074	2.16223	0	2.23689	5.39266	3.82798	1.40018	0.970918	1.3809
MA0528.1_ZNF263	2.09432	1.41893	0.504224	2.23689	0	4.7813	3.91265	7.55652	3.09933	2.79756
MA0727.1_NR3C2	2.29841	6.35066	1.5869	5.39266	4.7813	0	-1.36445	0.325175	0.686797	0.493798
MA0113.3_NR3C1	2.80469	4.68573	2.22376	3.82798	3.91265	-1.36445	0	0.25493	0.998282	0.145089
MA0471.1_E2F6	0.452276	1.51879	0.697087	1.40018	7.55652	0.325175	0.25493	0	2.05469	2.43478
MA0081.1_SPIB	1.98799	2.14011	0.829214	0.970918	3.09933	0.686797	0.998282	2.05469	0	2.7502
MA0712.1_OTX2	-0.0232813	0.164725	1.24192	1.3809	2.79756	0.493798	0.145089	2.43478	2.7502	0
Late stage
	MA0099.2_FOS..JUN	MA0698.1_ZBTB18	MA0691.1_TFAP4	MA0498.2_MEIS1	MA0667.1_MYF6	MA0141.3_ESRRB	MA0744.1_SCRT2	MA0774.1_MEIS2	MA0914.1_ISL2	MA0794.1_PROX1
MA0099.2_FOS::JUN	0	1.51865	3.33314	2.27593	2.68443	1.96779	3.1186	2.07863	1.00168	1.50125
MA0698.1_ZBTB18	1.51865	0	0.570149	2.41946	1.51664	3.12505	3.25152	2.83384	-0.640796	2.38889
MA0691.1_TFAP4	3.33314	0.570149	0	4.10403	0.922358	2.11155	6.36359	2.47686	1.86735	2.32964
MA0498.2_MEIS1	2.27593	2.41946	4.10403	0	2.18239	2.70701	3.45232	-0.437789	2.4738	0.888629
MA0667.1_MYF6	2.68443	1.51664	0.922358	2.18239	0	0.94996	1.70381	0.843958	0.512292	0.194933
MA0141.3_ESRRB	1.96779	3.12505	2.11155	2.70701	0.94996	0	4.24642	1.61607	0.708215	2.41815
MA0744.1_SCRT2	3.1186	3.25152	6.36359	3.45232	1.70381	4.24642	0	1.86175	1.11997	2.25397
MA0774.1_MEIS2	2.07863	2.83384	2.47686	-0.437789	0.843958	1.61607	1.86175	0	1.92905	0.722427
MA0914.1_ISL2	1.00168	-0.640796	1.86735	2.4738	0.512292	0.708215	1.11997	1.92905	0	0.981668
MA0794.1_PROX1	1.50125	2.38889	2.32964	0.888629	0.194933	2.41815	2.25397	0.722427	0.981668	0

## Sheet: Supplemental Table S9
Supplemental Table S9. Pairwise correlation coefficients of top motifs enriched in Amphimedon broad developmental stages at non-co-locating peaks.
Early stage
	MA0058.3_MAX	MA0464.2_BHLHE40	MA0685.1_SP4	MA0825.1_MNT	MA0657.1_KLF13	MA0740.1_KLF14	MA0663.1_MLX	MA0746.1_SP3	MA0664.1_MLXIPL	MA0636.1_BHLHE41
MA0058.3_MAX	1	0.932745	0.833131	0.588325	0.857622	0.870618	0.869421	0.858114	0.811145	0.776704
MA0464.2_BHLHE40	0.932745	1	0.864934	0.890196	0.872776	0.88235	0.58435	0.880238	0.470963	0.162476
MA0685.1_SP4	0.833131	0.864934	1	0.722509	-0.585241	0.0675572	0.848577	0.157351	0.807679	0.851593
MA0825.1_MNT	0.588325	0.890196	0.722509	1	0.806032	0.790287	0.870018	0.789609	0.857874	0.843788
MA0657.1_KLF13	0.857622	0.872776	-0.585241	0.806032	1	-0.200869	0.883222	-0.0231903	0.850616	0.858098
MA0740.1_KLF14	0.870618	0.88235	0.0675572	0.790287	-0.200869	1	0.880244	0.11662	0.836692	0.859501
MA0663.1_MLX	0.869421	0.58435	0.848577	0.870018	0.883222	0.880244	1	0.856496	-0.227953	0.267058
MA0746.1_SP3	0.858114	0.880238	0.157351	0.789609	-0.0231903	0.11662	0.856496	1	0.841722	0.84035
MA0664.1_MLXIPL	0.811145	0.470963	0.807679	0.857874	0.850616	0.836692	-0.227953	0.841722	1	0.383168
MA0636.1_BHLHE41	0.776704	0.162476	0.851593	0.843788	0.858098	0.859501	0.267058	0.84035	0.383168	1
Mid stage
	MA0106.3_TP53	MA0861.1_TP73	MA0646.1_GCM1	MA0610.1_DMRT3	MA0528.1_ZNF263	MA0727.1_NR3C2	MA0113.3_NR3C1	MA0471.1_E2F6	MA0081.1_SPIB	MA0712.1_OTX2
MA0106.3_TP53	1	0.534105	0.223059	0.491723	0.171158	0.610277	0.664745	0.472752	0.158368	0.591227
MA0861.1_TP73	0.534105	1	0.117555	0.405128	0.208392	0.432413	0.516569	0.584448	0.0845086	0.478183
MA0646.1_GCM1	0.223059	0.117555	1	0.803211	-0.207689	0.752691	0.712345	-0.0897616	0.616641	0.569083
MA0610.1_DMRT3	0.491723	0.405128	0.803211	1	-0.0556278	0.841566	0.824993	0.0710064	0.560264	0.738063
MA0528.1_ZNF263	0.171158	0.208392	-0.207689	-0.0556278	1	0.151675	0.205653	-0.378221	-0.630626	0.331823
MA0727.1_NR3C2	0.610277	0.432413	0.752691	0.841566	0.151675	1	0.678539	0.314256	0.730333	0.775147
MA0113.3_NR3C1	0.664745	0.516569	0.712345	0.824993	0.205653	0.678539	1	0.378004	0.685576	0.749615
MA0471.1_E2F6	0.472752	0.584448	-0.0897616	0.0710064	-0.378221	0.314256	0.378004	1	-0.0395726	0.309744
MA0081.1_SPIB	0.158368	0.0845086	0.616641	0.560264	-0.630626	0.730333	0.685576	-0.0395726	1	0.402992
MA0712.1_OTX2	0.591227	0.478183	0.569083	0.738063	0.331823	0.775147	0.749615	0.309744	0.402992	1
Late stage
	MA0691.1_TFAP4	MA0498.2_MEIS1	MA0099.2_FOS..JUN	MA0698.1_ZBTB18	MA0667.1_MYF6	MA0744.1_SCRT2	MA0774.1_MEIS2	MA0141.3_ESRRB	MA0914.1_ISL2	MA0794.1_PROX1
MA0691.1_TFAP4	1	0.846924	0.867756	0.798226	0.748815	0.579724	0.822911	0.819874	0.63812	0.435171
MA0498.2_MEIS1	0.846924	1	0.81857	0.820502	0.716972	0.67427	NA	0.738592	0.490857	0.625185
MA0099.2_FOS::JUN	0.867756	0.81857	1	0.824896	0.84511	0.649998	0.812946	0.721791	0.633128	0.554532
MA0698.1_ZBTB18	0.798226	0.820502	0.824896	1	0.759258	0.826824	0.78618	0.876965	0.821287	0.795448
MA0667.1_MYF6	0.748815	0.716972	0.84511	0.759258	1	0.70826	0.774194	0.776394	0.728492	0.756092
MA0744.1_SCRT2	0.579724	0.67427	0.649998	0.826824	0.70826	1	0.781805	0.837089	0.874563	0.761658
MA0774.1_MEIS2	0.822911	NA	0.812946	0.78618	0.774194	0.781805	1	0.786983	0.655839	0.660497
MA0141.3_ESRRB	0.819874	0.738592	0.721791	0.876965	0.776394	0.837089	0.786983	1	0.816152	0.742405
MA0914.1_ISL2	0.63812	0.490857	0.633128	0.821287	0.728492	0.874563	0.655839	0.816152	1	0.830706
MA0794.1_PROX1	0.435171	0.625185	0.554532	0.795448	0.756092	0.761658	0.660497	0.742405	0.830706	1

## Sheet: Supplemental Table S10
Supplemental Table S10. Performance statistics of 10 XGB models trained on known motifs and de novo Amphimedon k-mers to distinguish distal from proximal Amphimedon cis-regulatory regions.
species	stat	XGB model 1	XGB model 2	XGB model 3	XGB model 4	XGB model 5	XGB model 6	XGB model 7	XGB model 8	XGB model 9	XGB model 10
Amphimedon	Accuracy	0.6045	0.616	0.608	0.6233	0.6187	0.6095	0.6167	0.598	0.6267	0.6173
Amphimedon	AUC	0.645	0.661	0.6604	0.6706	0.6664	0.652	0.6618	0.6446	0.672	0.6658
Amphimedon	FNR	0.383	0.3789	0.3773	0.3685	0.3766	0.3844	0.3934	0.3878	0.3626	0.3817
Amphimedon	FPR	0.4078	0.3892	0.4061	0.3849	0.386	0.3965	0.3731	0.4156	0.3845	0.3836
Amphimedon	Precision	0.5979	0.6195	0.596	0.6236	0.6143	0.6065	0.6231	0.5847	0.632	0.6166
Amphimedon	Recall	0.617	0.6211	0.6227	0.6315	0.6234	0.6156	0.6066	0.6122	0.6374	0.6183
Capsaspora	Accuracy	0.5082	0.5055	0.5036	0.5109	0.509	0.5069	0.5101	0.5147	0.5045	0.5121
Capsaspora	AUC	0.5196	0.5224	0.5272	0.526	0.5254	0.5304	0.5325	0.5228	0.5352	0.5388
Capsaspora	FNR	0.0641	0.0374	0.0399	0.0503	0.0493	0.051	0.0363	0.1169	0.0325	0.0766
Capsaspora	FPR	0.9197	0.9519	0.9532	0.9281	0.9328	0.9354	0.9436	0.8539	0.9588	0.8995
Capsaspora	Precision	0.5045	0.5029	0.5019	0.5059	0.5049	0.5038	0.5054	0.5085	0.5024	0.5067
Capsaspora	Recall	0.9359	0.9626	0.9601	0.9497	0.9507	0.949	0.9637	0.8831	0.9675	0.9234
Fly	Accuracy	0.4037	0.3863	0.4205	0.3954	0.4372	0.4133	0.4042	0.3908	0.4144	0.4128
Fly	AUC	0.5859	0.5307	0.5664	0.5583	0.5991	0.6057	0.5931	0.5394	0.5905	0.5723
Fly	FNR	0.7628	0.7675	0.7238	0.7587	0.7028	0.7472	0.7556	0.7517	0.7351	0.7294
Fly	FPR	0.1164	0.1705	0.1635	0.1603	0.1592	0.1239	0.1351	0.1984	0.1544	0.1775
Fly	Precision	0.8546	0.7972	0.8296	0.8127	0.8433	0.8547	0.8391	0.783	0.8318	0.8147
Fly	Recall	0.2372	0.2325	0.2762	0.2413	0.2972	0.2528	0.2444	0.2483	0.2649	0.2706
Mouse	Accuracy	0.5226	0.5204	0.5311	0.5292	0.5152	0.5025	0.5173	0.5038	0.5384	0.5224
Mouse	AUC	0.4978	0.5023	0.4977	0.5179	0.4735	0.4867	0.502	0.4967	0.512	0.4551
Mouse	FNR	0.6177	0.5702	0.6349	0.5688	0.6368	0.5556	0.5685	0.5367	0.6035	0.7008
Mouse	FPR	0.3999	0.4295	0.3771	0.4167	0.4008	0.4654	0.4353	0.4738	0.3832	0.3542
Mouse	Precision	0.3457	0.3561	0.3486	0.3638	0.3338	0.3454	0.354	0.3508	0.3638	0.3183
Mouse	Recall	0.3823	0.4298	0.3651	0.4312	0.3632	0.4444	0.4315	0.4633	0.3965	0.2992
Worm	Accuracy	0.541	0.5393	0.5374	0.5338	0.5415	0.5407	0.5438	0.5298	0.5427	0.5359
Worm	AUC	0.544	0.5409	0.5364	0.5384	0.5409	0.5407	0.552	0.5335	0.5489	0.5415
Worm	FNR	0.2992	0.3177	0.3048	0.3736	0.2996	0.3216	0.3306	0.4007	0.3142	0.3749
Worm	FPR	0.6488	0.6306	0.65	0.5762	0.6474	0.6228	0.6054	0.5527	0.6272	0.57
Worm	Precision	0.562	0.5624	0.5595	0.5635	0.5624	0.564	0.5677	0.5629	0.565	0.5657
Worm	Recall	0.7008	0.6823	0.6952	0.6264	0.7004	0.6784	0.6694	0.5993	0.6858	0.6251
Zebrafish	Accuracy	0.3085	0.3172	0.3366	0.3151	0.2944	0.3332	0.3213	0.3257	0.305	0.284
Zebrafish	AUC	0.5203	0.52	0.5131	0.513	0.509	0.5129	0.5262	0.5076	0.5229	0.5117
Zebrafish	FNR	0.6979	0.6888	0.6689	0.6907	0.7124	0.6725	0.6847	0.6802	0.7016	0.723
Zebrafish	FPR	0.2838	0.299	0.3152	0.3111	0.2758	0.3071	0.296	0.302	0.2747	0.2717
Zebrafish	Precision	0.9856	0.9852	0.9854	0.9845	0.9853	0.9856	0.9856	0.9855	0.9858	0.9849
Zebrafish	Recall	0.3021	0.3112	0.3311	0.3093	0.2876	0.3275	0.3153	0.3198	0.2984	0.277

[truncated: 10 more sheets: Supplemental Table S11, Supplemental Table S12, Supplemental Table S13, Supplemental Table S14, Supplemental Table S15, Supplemental Table S16, Supplemental Table S17, Supplemental Table S18, Supplemental Table S19, Supplemental Table S20]
